# Supplementary material
Source: publisher figshare collection journal article supplement (https://gsajournals.figshare.com/ndownloader/files/25205636)
Supplement: Supplementary file 1 [file 25205636]

## Sheet: Genes_Top Three GO Transcripts
Trait	Sex	GO Term (Expression)	Go Term Description and Definition	Gene	Gene Name	Gene Symbol	GO Biological Process	GO Molecular Function
Chill Coma	Females	GO:0015035	protein disulfide oxidoreductase activity | haem lyase disulphide oxidoreductase activity | heme lyase disulfide oxidoreductase activity | protein disulphide oxidoreductase activity | thioredoxin activity. Catalysis of the reaction: a protein with reduced sulfide groups = a protein with oxidized disulfide bonds.	FBgn0029662	-	CG12206	cell redox homeostasis ; GO:0045454	electron transfer activity ; GO:0009055 | protein disulfide oxidoreductase activity ; GO:0015035
				FBgn0011761	deadhead	dhd	glycerol ether metabolic process ; GO:0006662 | cell redox homeostasis ; GO:0045454 | fertilization, exchange of chromosomal proteins ; GO:0035042 | head development ; GO:0060322 | female meiotic nuclear division ; GO:0007143 | sperm chromatin decondensation ; GO:0035041	protein disulfide oxidoreductase activity ; GO:0015035 | disulfide oxidoreductase activity ; GO:0015036
				FBgn0030584	-	CG14407	cell redox homeostasis ; GO:0045454	electron transfer activity ; GO:0009055 | protein disulfide oxidoreductase activity ; GO:0015035
				FBgn0040070	thioredoxin-2	Trx-2	glycerol ether metabolic process ; GO:0006662 | defense response to fungus ; GO:0050832 | response to oxidative stress ; GO:0006979 | cell redox homeostasis ; GO:0045454 | determination of adult lifespan ; GO:0008340	protein disulfide oxidoreductase activity ; GO:0015035 | disulfide oxidoreductase activity ; GO:0015036
				FBgn0261274	Endoplasmic reticulum oxidoreductin-1-like	Ero1L	oxidation-reduction process ; GO:0055114 | protein folding in endoplasmic reticulum ; GO:0034975 | chaperone cofactor-dependent protein refolding ; GO:0051085	oxidoreductase activity, acting on a sulfur group of donors, disulfide as acceptor ; GO:0016671 | protein disulfide isomerase activity ; GO:0003756 | protein disulfide oxidoreductase activity ; GO:0015035 | oxidoreductase activity ; GO:0016491
				FBgn0035631	Thioredoxin-like	Txl	cell redox homeostasis ; GO:0045454	disulfide oxidoreductase activity ; GO:0015036
				FBgn0004465	Suppressor of ref(2)P sterility	Su(P)	cell redox homeostasis ; GO:0045454	electron transfer activity ; GO:0009055 | protein disulfide oxidoreductase activity ; GO:0015035 | prostaglandin-E synthase activity ; GO:0050220
				FBgn0036820	Glutaredoxin 1	Grx1	cell redox homeostasis ; GO:0045454 | response to copper ion ; GO:0046688 | copper ion homeostasis ; GO:0055070 | cellular response to oxidative stress ; GO:0034599	electron transfer activity ; GO:0009055 | protein disulfide oxidoreductase activity ; GO:0015035 | glutathione-disulfide reductase activity ; GO:0004362
		GO:0007309	oocyte axis specification | oocyte axis determination. The establishment, maintenance and elaboration of an axis in the oocyte. An example of this is found in Drosophila melanogaster.	FBgn0261524	licorne	lic	positive regulation of protein phosphorylation ; GO:0001934 | activation of MAPK activity ; GO:0000187 | stress-activated protein kinase signaling cascade ; GO:0031098 | p38MAPK cascade ; GO:0038066 | positive regulation of cell size ; GO:0045793 | MAPK cascade ; GO:0000165 | mucosal immune response ; GO:0002385 | signal transduction by protein phosphorylation ; GO:0023014 | negative regulation o…	ATP binding ; GO:0005524 | MAP kinase kinase activity ; GO:0004708 | mitogen-activated protein kinase kinase kinase binding ; GO:0031435 | protein kinase activity ; GO:0004672 | protein serine/threonine kinase activity ; GO:0004674
				FBgn0000163	bazooka	baz	asymmetric protein localization involved in cell fate determination ; GO:0045167 | border follicle cell delamination ; GO:0030709 | apical protein localization ; GO:0045176 | establishment or maintenance of epithelial cell apical/basal polarity ; GO:0045197 | establishment of apical/basal cell polarity ; GO:0035089 | branching involved in open tracheal system development ; GO:0060446 | establishm…	phosphatidic acid binding ; GO:0070300 | protein binding ; GO:0005515 | phosphatidylinositol binding ; GO:0035091 | phosphatidylinositol binding ; GO:0035091
				FBgn0026192	par-6	par-6	zonula adherens assembly ; GO:0045186 | positive regulation of lamellipodium assembly ; GO:0010592 | border follicle cell migration ; GO:0007298 | establishment or maintenance of neuroblast polarity ; GO:0045196 | positive regulation of filopodium assembly ; GO:0051491 | establishment of neuroblast polarity ; GO:0045200 | apical protein localization ; GO:0045176 | establishment or maintenance of …	Rho GTPase binding ; GO:0017048 | protein binding ; GO:0005515 | iprotein kinase C binding ; GO:0005080
				FBgn0001137	gurken	grk	epidermal growth factor receptor signaling pathway ; GO:0007173 | chorion-containing eggshell pattern formation ; GO:0030381 | oocyte dorsal/ventral axis specification ; GO:0007310 | dorsal/ventral axis specification, ovarian follicular epithelium ; GO:0008069 | anterior/posterior pattern specification ; GO:0009952 | positive regulation of border follicle cell migration ; GO:1903688 | imaginal di…	epidermal growth factor receptor binding ; GO:0005154 | receptor ligand activity ; GO:0048018 | protein binding ; GO:0005515
				FBgn0000183	Bicaudal D	BicD	oogenesis ; GO:0048477 | regulation of endocytosis ; GO:0030100 | synaptic vesicle endocytosis ; GO:0048488 | germarium-derived oocyte fate determination ; GO:0007294 | oocyte microtubule cytoskeleton organization ; GO:0016325 | positive regulation of synaptic vesicle exocytosis ; GO:2000302 | positive regulation of clathrin-dependent endocytosis ; GO:2000370 | intracellular mRNA localization ; G…	cytoskeletal adaptor activity ; GO:0008093 | dynein complex binding ; GO:0070840 | Rab GTPase binding ; GO:0017137 | mRNA binding ; GO:0003729 | clathrin heavy chain binding ; GO:0032050 | protein binding ; GO:0005515
				FBgn0034072	Dystroglycan	Dg	cytoskeletal anchoring at plasma membrane ; GO:0007016 | oocyte axis specification ; GO:0007309 | establishment or maintenance of cell polarity ; GO:0007163 | muscle cell cellular homeostasis ; GO:0046716 | growth of a germarium-derived egg chamber ; GO:0007295 | establishment of cell polarity ; GO:0030010 | imaginal disc-derived wing vein specification ; GO:0007474 | regulation of glycolytic pro…	calcium ion binding ; GO:0005509 | protein binding ; GO:0005515 | structural constituent of muscle ; GO:0008307 | protein binding ; GO:0005515
				FBgn0034451	tubulin-binding cofactor B	TBCB	establishment of apical/basal cell polarity ; GO:0035089 | cytoplasmic microtubule organization ; GO:0031122 | oocyte axis specification ; GO:0007309	-
				FBgn0003731	Epidermal growth factor receptor	Egfr	cell-cell adhesion ; GO:0098609 | notum development ; GO:0007477 | epithelial cell proliferation involved in Malpighian tubule morphogenesis ; GO:0061331 | eye-antennal disc morphogenesis ; GO:0007455 | negative regulation of G1/S transition of mitotic cell cycle ; GO:2000134 | morphogenesis of follicular epithelium ; GO:0016333 | ommatidial rotation ; GO:0016318 | imaginal disc-derived wing morp…	protein domain specific binding ; GO:0019904 | ATP binding ; GO:0005524 | epidermal growth factor-activated receptor activity ; GO:0005006 | protein binding ; GO:0005515 | transmembrane receptor protein tyrosine kinase activity ; GO:0004714
				FBgn0003205	Ras oncogene at 85D	Ras85D	cell fate determination ; GO:0001709 | vascular endothelial growth factor receptor signaling pathway ; GO:0048010 | myoblast fate specification ; GO:0048626 | lymph gland plasmatocyte differentiation ; GO:0035169 | imaginal disc-derived wing vein specification ; GO:0007474 | positive regulation of cell population proliferation ; GO:0008284 | sevenless signaling pathway ; GO:0045500 | imaginal dis…	GTPase activity ; GO:0003924 | protein binding ; GO:0005515 | GTP binding ; GO:0005525 | GDP binding ; GO:0019003 | protein serine/threonine kinase activator activity ; GO:0043539
				FBgn0004882	oo18 RNA-binding protein	orb	pole plasm oskar mRNA localization ; GO:0045451 | regulation of oskar mRNA translation ; GO:0046011 | mRNA polyadenylation ; GO:0006378 | dorsal/ventral axis specification, ovarian follicular epithelium ; GO:0008069 | oocyte anterior/posterior axis specification ; GO:0007314 | oocyte dorsal/ventral axis specification ; GO:0007310 | negative regulation of cytoplasmic translation ; GO:2000766 | ger…	mRNA binding ; GO:0003729 | translation factor activity, RNA binding ; GO:0008135 | protein binding ; GO:0005515 | translation repressor activity, mRNA regulatory element binding ; GO:0000900 | ribosome binding ; GO:0043022 | mRNA 3'-UTR binding ; GO:0003730
				FBgn0086362	spn-F	spn-F	chaeta morphogenesis ; GO:0008407 | oocyte anterior/posterior axis specification ; GO:0007314 | positive regulation of neuron remodeling ; GO:1904801 | cellular protein localization ; GO:0034613 | oocyte axis specification ; GO:0007309 | regulation of pole plasm oskar mRNA localization ; GO:0007317 | oocyte microtubule cytoskeleton organization ; GO:0016325 | oocyte microtubule cytoskeleton polar…	protein binding ; GO:0005515 | ATP-dependent microtubule motor activity, minus-end-directed ; GO:0008569
				FBgn0026181	Rho kinase	Rok	regulation of actin filament bundle assembly ; GO:0032231 |mitotic cytokinesis ; GO:0000281 | regulation of phosphorylation ; GO:0042325 | epidermis development ; GO:0008544 | mitotic cell cycle ; GO:0000278 | regulation of axonogenesis ; GO:0050770 | actin cytoskeleton reorganization ; GO:0031532 | morphogenesis of embryonic epithelium ; GO:0016331 | regulation of planar cell polarity pathway in…	ATP binding ; GO:0005524 | GTPase binding ; GO:0051020 | protein binding ; GO:0005515 | Rho-dependent protein serine/threonine kinase activity ; GO:0072518 | protein serine/threonine kinase activity ; GO:0004674 | GTP-Rho binding ; GO:0017049
				FBgn0261854	atypical protein kinase C	aPKC	branching involved in open tracheal system development ; GO:0060446 | maintenance of cell polarity ; GO:0030011 | spermatogenesis ; GO:0007283 | compound eye retinal cell programmed cell death ; GO:0046667 | adherens junction organization ; GO:0034332 | terminal branching, open tracheal system ; GO:0007430 | establishment or maintenance of neuroblast polarity ; GO:0045196 | synapse assembly ; GO:…	ATP binding ; GO:0005524 | protein serine/threonine kinase activity ; GO:0004674 | myosin binding ; GO:0017022 | protein binding ; GO:0005515
		GO:0003755	peptidyl-prolyl cis-trans isomerase activity | cis-trans proline isomerase activity | cyclophilin activity | cyclophilin-type peptidyl-prolyl cis-trans isomerase activity | FK506-sensitive peptidyl-prolyl cis-trans isomerase | immunophilin | juglone-sensitive cis-trans proline isomerase activity | juglone-sensitive peptidyl-prolyl cis-trans isomerase activity | parvulin | peptide bond isomerase a…	FBgn0030696	-	CG8509	mitotic spindle organization ; GO:0007052	protein tyrosine phosphatase activator activity ; GO:0008160 | peptidyl-prolyl cis-trans isomerase activity ; GO:0003755
				FBgn0004432	Cyclophilin 1	Cyp1	protein peptidyl-prolyl isomerization ; GO:0000413 | protein refolding ; GO:0042026	peptidyl-prolyl cis-trans isomerase activity ; GO:0003755 | unfolded protein binding ; GO:0051082 | cyclosporin A binding ; GO:0016018
				FBgn0015379	dodo	dod	regulation of locomotor rhythm ; GO:1904059 | positive regulation of protein ubiquitination ; GO:0031398	peptidyl-prolyl cis-trans isomerase activity ; GO:0003755 | transcription factor binding ; GO:0008134
				FBgn0002936	neither inactivation nor afterpotential A	ninaA	protein peptidyl-prolyl isomerization ; GO:0000413 | phototransduction ; GO:0007602 | rhodopsin biosynthetic process ; GO:0016063 | intrinsic apoptotic signaling pathway in response to endoplasmic reticulum stress ; GO:0070059 | N-glycan processing ; GO:0006491 | protein refolding ; GO:0042026 | phototransduction, visible light ; GO:0007603 | protein deglycosylation ; GO:0006517 | 'de novo' prote…	peptidyl-prolyl cis-trans isomerase activity ; GO:0003755 | cyclosporin A binding ; GO:0016018 | cyclosporin A binding ; GO:0016018 | unfolded protein binding ; GO:0051082
				FBgn0016698	Phosphotyrosyl phosphatase activator	Ptpa	regulation of asymmetric protein localization involved in cell fate determination ; GO:1904785 | basal protein localization ; GO:0045175 | mitotic spindle organization ; GO:0007052	protein tyrosine phosphatase activator activity ; GO:0008160 | peptidyl-prolyl cis-trans isomerase activity ; GO:0003755
				FBgn0033089	-	CG17266	protein peptidyl-prolyl isomerization ; GO:0000413 | positive regulation of viral genome replication ; GO:0045070 | mRNA splicing, via spliceosome ; GO:0000398 | protein refolding ; GO:0042026 | angiogenesis ; GO:0001525	cyclosporin A binding ; GO:0016018 | unfolded protein binding ; GO:0051082 | ribonucleoprotein complex binding ; GO:0043021 |peptidyl-prolyl cis-trans isomerase activity ; GO:0003755
				FBgn0033527	-	CG11777	protein peptidyl-prolyl isomerization ; GO:0000413 | protein polyubiquitination ; GO:0000209	peptidyl-prolyl cis-trans isomerase activity ; GO:0003755
				FBgn0034109	-	CG7747	protein folding ; GO:0006457 | protein peptidyl-prolyl isomerization ; GO:0000413 | mRNA splicing, via spliceosome ; GO:0000398 | protein polyubiquitination ; GO:0000209	ubiquitin-ubiquitin ligase activity ; GO:0034450 | peptidyl-prolyl cis-trans isomerase activity ; GO:0003755 | ubiquitin-protein transferase activity ; GO:0004842
				FBgn0028382	cyclophilin-33	cyp33	protein peptidyl-prolyl isomerization ; GO:0000413 | protein refolding ; GO:0042026 | mRNA splicing, via spliceosome ; GO:0000398	RNA binding ; GO:0003723 | unfolded protein binding ; GO:0051082 | mRNA binding ; GO:0003729 | cyclosporin A binding ; GO:0016018 | peptidyl-prolyl cis-trans isomerase activity ; GO:0003755
				FBgn0034368	zonda	zda	-	-
				FBgn0013954	FK506-binding protein 12kD	Fkbp12	protein peptidyl-prolyl isomerization ; GO:0000413 | chaperone-mediated protein folding ; GO:0061077	peptidyl-prolyl cis-trans isomerase activity ; GO:0003755
				FBgn0010470	FK506-binding protein 14	Fkbp14	imaginal disc-derived wing margin morphogenesis ; GO:0008587 | chaeta development ; GO:0022416 | positive regulation of Notch signaling pathway ; GO:0045747 | imaginal disc development ; GO:0007444 | muscle cell cellular homeostasis ; GO:0046716	calcium ion binding ; GO:0005509
				FBgn0034753	-	CG2852	protein peptidyl-prolyl isomerization ; GO:0000413 | multicellular organism reproduction ; GO:0032504 | protein refolding ; GO:0042026	peptidyl-prolyl cis-trans isomerase activity ; GO:0003755 | unfolded protein binding ; GO:0051082 | cyclosporin A binding ; GO:0016018
				FBgn0035027	-	CG3511	protein peptidyl-prolyl isomerization ; GO:0000413	peptidyl-prolyl cis-trans isomerase activity ; GO:0003755
				FBgn0035141	Cyclophilin-like	Cypl	protein folding ; GO:0006457 | mRNA splicing, via spliceosome ; GO:0000398 | protein peptidyl-prolyl isomerization ; GO:0000413	peptidyl-prolyl cis-trans isomerase activity ; GO:0003755
				FBgn0036020	-	CG8336	protein peptidyl-prolyl isomerization ; GO:0000413 | protein refolding ; GO:0042026 | regulation of apoptotic process ; GO:0042981	peptidyl-prolyl cis-trans isomerase activity ; GO:0003755 | cyclosporin A binding ; GO:0016018 | unfolded protein binding ; GO:0051082
				FBgn0036207	-	CG10907	protein folding ; GO:0006457 | protein peptidyl-prolyl isomerization ; GO:0000413 | mRNA splicing, via spliceosome ; GO:0000398	peptidyl-prolyl cis-trans isomerase activity ; GO:0003755
				FBgn0036415	-	CG7768	protein peptidyl-prolyl isomerization ; GO:0000413 | protein refolding ; GO:0042026	cyclosporin A binding ; GO:0016018 | peptidyl-prolyl cis-trans isomerase activity ; GO:0003755 | unfolded protein binding ; GO:0051082
				FBgn0037930	-	CG14715	-	-
				FBgn0013269	FK506-binding protein 39kD	Fkbp39	negative regulation of macroautophagy ; GO:0016242 | negative regulation of autophagy ; GO:0010507 | juvenile hormone mediated signaling pathway ; GO:0035626	juvenile hormone response element binding ; GO:0070594 | FK506 binding ; GO:0005528 | protein binding ; GO:0005515
				FBgn0038857	Bride of doubletime	Bdbt	regulation of post-translational protein modification ; GO:1901873 | chaperone-mediated protein folding ; GO:0061077 | protein peptidyl-prolyl isomerization ; GO:0000413 | locomotor rhythm ; GO:0045475 | regulation of protein catabolic process ; GO:0042176	protein binding ; GO:0005515 | peptidyl-prolyl cis-trans isomerase activity ; GO:0003755
				FBgn0027617	-	CG5808	protein peptidyl-prolyl isomerization ; GO:0000413 | mRNA splicing, via spliceosome ; GO:0000398 | regulation of phosphorylation of RNA polymerase II C-terminal domain ; GO:1901407	nucleic acid binding ; GO:0003676 | peptidyl-prolyl cis-trans isomerase activity ; GO:0003755 | mRNA binding ; GO:0003729
				FBgn0039347	-	CG5071	protein peptidyl-prolyl isomerization ; GO:0000413 | protein refolding ; GO:0042026	zinc ion binding ; GO:0008270 | cyclosporin A binding ; GO:0016018 | unfolded protein binding ; GO:0051082 | peptidyl-prolyl cis-trans isomerase activity ; GO:0003755
				FBgn0039581	Moca-cyp	Moca-cyp	protein peptidyl-prolyl isomerization ; GO:0000413 | protein refolding ; GO:0042026 | mRNA splicing, via spliceosome ; GO:0000398	peptidyl-prolyl cis-trans isomerase activity ; GO:0003755 | cyclosporin A binding ; GO:0016018 | unfolded protein binding ; GO:0051082
				FBgn0003401	shutdown	shu	oogenesis ; GO:0048477 | piRNA metabolic process ; GO:0034587	-
				FBgn0029174	FK506-binding protein 59kD	Fkbp59	chaperone-mediated protein folding ; GO:0061077 | detection of light stimulus involved in visual perception ; GO:0050908 | protein peptidyl-prolyl isomerization ; GO:0000413 | regulation of calcium ion transport ; GO:0051924	heat shock protein binding ; GO:0031072 | FK506 binding ; GO:0005528 | protein binding ; GO:0005515 | peptidyl-prolyl cis-trans isomerase activity ; GO:0003755
	Males	GO:0007266	Rho protein signal transduction | Rho mediated signal transduction. A series of molecular signals within the cell that are mediated by a member of the Rho family of proteins switching to a GTP-bound active state.	FBgn0030685
				FBgn0025743	mushroom bodies tiny	mbt	peptidyl-serine phosphorylation ; GO:0018105 | activation of MAPK activity ; GO:0000187 | mushroom body development ; GO:0016319 | compound eye photoreceptor cell differentiation ; GO:0001751 | activation of protein kinase activity ; GO:0032147 | regulation of cell-cell adhesion mediated by cadherin ; GO:2000047 | compound eye development ; GO:0048749 | positive regulation of compound eye photore…	protein serine/threonine kinase activity ; GO:0004674 | ATP binding ; GO:0005524 | protein binding ; GO:0005515 | Rho GTPase binding ; GO:0017048 | protein kinase activity ; GO:0004672
				FBgn0010341	Cdc42	Cdc42	regulation of actin filament polymerization ; GO:0030833 | sensory perception of touch ; GO:0050975 | Rho protein signal transduction ; GO:0007266 | oogenesis ; GO:0048477 | positive regulation of wound healing ; GO:0090303 | maintenance of protein location ; GO:0045185 | protein localization to plasma membrane ; GO:0072659 | response to wounding ; GO:0009611 | branching involved in open tracheal…	protein binding ; GO:0005515 | GTP binding ; GO:0005525 | protein kinase binding ; GO:0019901 | GTPase activity ; GO:0003924 | GTPase activating protein binding ; GO:0032794protein kinase binding ; GO:0019901
				FBgn0031118	Rho GTPase activating protein at 19D	RhoGAP19D	regulation of GTPase activity ; GO:0043087 | imaginal disc-derived leg morphogenesis ; GO:0007480 | Rho protein signal transduction ; GO:0007266	GTPase activator activity ; GO:0005096
				FBgn0086356	tumbleweed	tum	maintenance of protein location in cell ; GO:0032507 | mitotic cytokinesis ; GO:0000281 | wound healing ; GO:0042060 | negative regulation of epidermal growth factor receptor signaling pathway ; GO:0042059 | negative regulation of canonical Wnt signaling pathway ; GO:0090090 | negative regulation of ERK1 and ERK2 cascade ; GO:0070373 | response to wounding ; GO:0009611 | regulation of stem cell d…	GTPase activator activity ; GO:0005096
				FBgn0035148	-	CG3402	-	-
				FBgn0014011	Rac2	Rac2	regulation of actin cytoskeleton organization ; GO:0032956 | cortical cytoskeleton organization ; GO:0030865 | encapsulation of foreign target ; GO:0035010 | morphogenesis of an epithelium ; GO:0002009 | dorsal closure ; GO:0007391 | regulation of adherens junction organization ; GO:1903391 | lamellipodium assembly ; GO:0030032 | aggressive behavior ; GO:0002118 | dorsal closure, elongation of le…	GTPase activity ; GO:0003924 | protein kinase binding ; GO:0019901 | protein binding ; GO:0005515 | protein kinase binding ; GO:0019901 | GTP binding ; GO:0005525
				FBgn0036257	Rho GTPase activating protein at 68F	RhoGAP68F	ventral furrow formation ; GO:0007370 | positive regulation of synaptic growth at neuromuscular junction ; GO:0045887 | Rho protein signal transduction ; GO:0007266 | negative regulation of stress fiber assembly ; GO:0051497 | negative regulation of endocytic recycling ; GO:2001136 | imaginal disc-derived leg morphogenesis ; GO:0007480	GTPase activator activity ; GO:0005096 | Rab GTPase binding ; GO:0017137
				FBgn0036518	Rho GTPase activating protein at 71E	RhoGAP71E	Rho protein signal transduction ; GO:0007266 | apical constriction involved in gastrulation ; GO:0003384 | imaginal disc-derived leg morphogenesis ; GO:0007480	GTPase activator activity ; GO:0005096
				FBgn0044826	Pak3	Pak3	activation of protein kinase activity ; GO:0032147 | stress-activated protein kinase signaling cascade ; GO:0031098 | actin filament organization ; GO:0007015 | protein phosphorylation ; GO:0006468 | positive regulation of synapse assembly ; GO:0051965 | protein autophosphorylation ; GO:0046777 | signal transduction by protein phosphorylation ; GO:0023014 | regulation of mitotic cell cycle ; GO:0…	ATP binding ; GO:0005524 | protein serine/threonine kinase activity ; GO:0004674 | Rac GTPase binding ; GO:0048365 | protein homodimerization activity ; GO:0042803
				FBgn0039532	Mig-2-like	Mtl	Rho protein signal transduction ; GO:0007266 | dorsal closure, elongation of leading edge cells ; GO:0007394 | lamellipodium assembly ; GO:0030032 | dorsal closure ; GO:0007391 | JNK cascade ; GO:0007254 | salivary gland morphogenesis ; GO:0007435 | actin cytoskeleton reorganization ; GO:0031532 | hemocyte migration ; GO:0035099 | germ-band shortening ; GO:0007390 | positive regulation of wound h…	GTP binding ; GO:0005525 | GTPase activity ; GO:0003924
				FBgn0039883	Rho GTPase activating protein at 100F	RhoGAP100F	signal transduction ; GO:0007165 | activation of GTPase activity ; GO:0090630 | R7 cell development ; GO:0045467 | maintenance of presynaptic active zone structure ; GO:0048790 | Rho protein signal transduction ; GO:0007266 | presynaptic active zone organization ; GO:1990709 | cytoskeletal matrix organization at active zone ; GO:0048789 | axon extension involved in axon guidance ; GO:0048846 | sy…	GTPase activator activity ; GO:0005096
				FBgn0026181	Rho kinase	Rok	regulation of actin filament bundle assembly ; GO:0032231 | mitotic cytokinesis ; GO:0000281 | regulation of phosphorylation ; GO:0042325 | epidermis development ; GO:0008544 | mitotic cell cycle ; GO:0000278 | regulation of axonogenesis ; GO:0050770 | actin cytoskeleton reorganization ; GO:0031532 | morphogenesis of embryonic epithelium ; GO:0016331 | regulation of planar cell polarity pathway i…	ATP binding ; GO:0005524 | GTPase binding ; GO:0051020 | protein binding ; GO:0005515 | Rho-dependent protein serine/threonine kinase activity ; GO:0072518 | protein serine/threonine kinase activity ; GO:0004674 | GTP-Rho binding ; GO:0017049
				FBgn0029105	alpha-catenin related	alpha-Catr	cell adhesion ; GO:0007155 | Rho protein signal transduction ; GO:0007266	actin filament binding ; GO:0051015
				FBgn0045843	Rac GTPase activating protein at 84C	RacGAP84C	compound eye morphogenesis ; GO:0001745 | spermatogenesis ; GO:0007283 | Rho protein signal transduction ; GO:0007266	Rho GTPase binding ; GO:0017048 | GTPase activator activity ; GO:0005096
		GO:0035025	positive regulation of Rho protein signal transduction | activation of Rho protein signal transduction | stimulation of Rho protein signal transduction | up regulation of Rho protein signal transduction | up-regulation of Rho protein signal transduction | upregulation of Rho protein signal transduction. Any process that activates or increases the frequency, rate or extent of Rho protein signal tr…	FBgn0023540	-	CG3630	positive regulation of transcription, DNA-templated ; GO:0045893 | positive regulation of Rho protein signal transduction ; GO:0035025 | positive regulation of transcription by RNA polymerase II ; GO:0045944 | positive regulation of DNA-binding transcription factor activity ; GO:0051091	actin binding ; GO:0003779
				FBgn0263706	-	CG43658	regulation of Rho protein signal transduction ; GO:0035023 | actin cytoskeleton organization ; GO:0030036 | positive regulation of Rho protein signal transduction ; GO:0035025 | imaginal disc-derived leg morphogenesis ; GO:0007480 | positive regulation of stress fiber assembly ; GO:0051496	guanyl-nucleotide exchange factor activity ; GO:0005085 | Rho guanyl-nucleotide exchange factor activity ; GO:0005089
				FBgn0050440	-	CG30440	positive regulation of Rho protein signal transduction ; GO:0035025	Rho guanyl-nucleotide exchange factor activity ; GO:0005089
				FBgn0023172	Rho guanine nucleotide exchange factor 2	RhoGEF2	actin filament organization ; GO:0007015 | spiracle morphogenesis, open tracheal system ; GO:0035277 | regulation of embryonic cell shape ; GO:0016476 | germ-band extension ; GO:0007377 | response to wounding ; GO:0009611 | ventral furrow formation ; GO:0007370 | apical constriction involved in ventral furrow formation ; GO:0110072 | actin-mediated cell contraction ; GO:0070252 | cellularization …	Rho guanyl-nucleotide exchange factor activity ; GO:0005089
				FBgn0050456	-	CG30456	imaginal disc-derived leg morphogenesis ; GO:0007480 | positive regulation of Rho protein signal transduction ; GO:0035025	Rho guanyl-nucleotide exchange factor activity ; GO:0005089
				FBgn0034194	-	CG15611	response to endoplasmic reticulum stress ; GO:0034976 | positive regulation of Rho protein signal transduction ; GO:0035025	Rho guanyl-nucleotide exchange factor activity ; GO:0005089
				FBgn0035574	Rho guanine nucleotide exchange factor at 64C	RhoGEF64C	positive regulation of Rho protein signal transduction ; GO:0035025 | axon guidance ; GO:0007411 | imaginal disc-derived leg morphogenesis ; GO:0007480 | spiracle morphogenesis, open tracheal system ; GO:0035277	Rho guanyl-nucleotide exchange factor activity ; GO:0005089
				FBgn0035761	Rho guanine nucleotide exchange factor 4	RhoGEF4	positive regulation of stress fiber assembly ; GO:0051496 | positive regulation of Rho protein signal transduction ; GO:0035025	Rho guanyl-nucleotide exchange factor activity ; GO:0005089
				FBgn0261547	Ephexin	Exn	positive regulation of Rho protein signal transduction ; GO:0035025 | imaginal disc-derived leg morphogenesis ; GO:0007480 | regulation of neurotransmitter secretion ; GO:0046928 | melanotic encapsulation of foreign target ; GO:0035011	Rho guanyl-nucleotide exchange factor activity ; GO:0005089
				FBgn0261556	-	CG42674	imaginal disc-derived leg morphogenesis ; GO:0007480 | positive regulation of Rho protein signal transduction ; GO:0035025	Rho guanyl-nucleotide exchange factor activity ; GO:0005089
				FBgn0262562	-	CG43102	actin cytoskeleton organization ; GO:0030036 | positive regulation of Rho protein signal transduction ; GO:0035025	guanyl-nucleotide exchange factor activity ; GO:0005085 | Rho guanyl-nucleotide exchange factor activity ; GO:0005089
				FBgn0024277	trio	trio	positive regulation of synaptic growth at neuromuscular junction ; GO:0045887 | axon guidance ; GO:0007411 | actin cytoskeleton organization ; GO:0030036 | peripheral nervous system development ; GO:0007422 | axon extension ; GO:0048675 | positive regulation of Rho protein signal transduction ; GO:0035025 | response to BMP ; GO:0071772 | central nervous system development ; GO:0007417 | actin cyt…	Rac guanyl-nucleotide exchange factor activity ; GO:0030676 | Rho guanyl-nucleotide exchange factor activity ; GO:0005089 | protein serine/threonine kinase activity ; GO:0004674
				FBgn0035802	Puratrophin-1-like	Pura	neuron projection morphogenesis ; GO:0048812 | regulation of locomotor rhythm ; GO:1904059 | positive regulation of Rho protein signal transduction ; GO:0035025 | imaginal disc-derived leg morphogenesis ; GO:0007480	Rho guanyl-nucleotide exchange factor activity ; GO:0005089
				FBgn0025836	Rho GTPase activating protein at 1A	RhoGAP1A	positive regulation of GTPase activity ; GO:0043547 | positive regulation of Rho protein signal transduction ; GO:0035025 | Golgi organization ; GO:0007030 | negative regulation of cell size ; GO:0045792	GTPase activator activity ; GO:0005096 | Rho guanyl-nucleotide exchange factor activity ; GO:0005089
		GO:0031514	motile cilium | microtubule-based flagellum | motile cilia | motile primary cilia | motile primary cilium | motile secondary cilium | nodal cilium. A cilium which may have a variable arrangement of axonemal microtubules and also contains molecular motors. It may beat with a whip-like pattern that promotes cell motility or transport of fluids and other cells across a cell surface, such as on epith…	FBgn0029667	Growth arrest specific protein 8	Gas8	flagellated sperm motility ; GO:0030317 | cellular protein localization ; GO:0034613	microtubule binding ; GO:0008017 |Rab GTPase binding ; GO:0017137
				FBgn0014395	touch insensitive larva B	tilB	male courtship behavior, veined wing generated song production ; GO:0045433 | temperature compensation of the circadian clock ; GO:0010378 | cilium-dependent cell motility ; GO:0060285 | sensory perception of sound ; GO:0007605 | iaxoneme assembly ; GO:0035082	-
				FBgn0019828	don juan	dj	sperm individualization ; GO:0007291 | spermatogenesis ; GO:0007283	-
				FBgn0013812	Dynein heavy chain at 93AB	Dhc93AB	sensory perception of sound ; GO:0007605 | cilium movement ; GO:0003341 | microtubule-based movement ; GO:0007018	ATP binding ; GO:0005524 | ATP-dependent microtubule motor activity, minus-end-directed ; GO:0008569 | dynein light intermediate chain binding ; GO:0051959 | dynein intermediate chain binding ; GO:0045505
				FBgn0083946	lost boys	lobo	flagellated sperm motility ; GO:0030317 | cell motility ; GO:0048870 | sperm storage ; GO:0046693 | flagellated sperm motility ; GO:0030317	-
Startle Response	Females	GO:0006325	chromatin organization | chromatin modification | chromatin organisation | establishment or maintenance of chromatin architecture. Any process that results in the specification, formation or maintenance of the physical structure of eukaryotic chromatin.	FBgn0004655	wings apart-like	wapl	regulation of chromosome condensation ; GO:0060623 | sister chromatid cohesion ; GO:0007062 | mitotic cohesin unloading ; GO:0061781 | meiotic chromosome segregation ; GO:0045132 | chromatin organization ; GO:0006325 | regulation of cohesin loading ; GO:0071922	-
				FBgn0061200	Nucleoporin 153kD	Nup153	protein import into nucleus ; GO:0006606 | chromatin organization ; GO:0006325 | dosage compensation ; GO:0007549 | RNA export from nucleus ; GO:0006405 | positive regulation of transcription by RNA polymerase II ; GO:0045944 | NLS-bearing protein import into nucleus ; GO:0006607 | chromatin remodeling ; GO:0006338 | nuclear pore organization ; GO:0006999 | protein import into nucleus ; GO:000660…	nuclear localization sequence binding ; GO:0008139 | chromatin DNA binding ; GO:0031490 | structural constituent of nuclear pore ; GO:0017056
				FBgn0014010	Rab5	Rab5	axon extension ; GO:0048675 | border follicle cell migration ; GO:0007298 | regulation of endocytosis ; GO:0030100 | vesicle-mediated transport ; GO:0016192 | endosomal vesicle fusion ; GO:0034058 | negative regulation of cell population proliferation ; GO:0008285 | cellularization ; GO:0007349 | endocytosis ; GO:0006897 | imaginal disc-derived male genitalia morphogenesis ; GO:0048803 | Rab prot…	GTP binding ; GO:0005525 | protein binding ; GO:0005515 | GTPase activity ; GO:0003924
				FBgn0031435	Early boundary activity 2	Elba2	chromatin silencing ; GO:0006342 | chromatin organization ; GO:0006325 | negative regulation of transcription, DNA-templated ; GO:0045892	sequence-specific DNA binding ; GO:0043565 | chromatin insulator sequence binding ; GO:0043035 | sequence-specific DNA binding ; GO:0043565 | chromatin binding ; GO:0003682
				FBgn0031759	little imaginal discs	lid	negative regulation of stem cell differentiation ; GO:2000737 | chromatin organization ; GO:0006325 | oocyte karyosome formation ; GO:0030717 | histone H3-K4 demethylation, trimethyl-H3-K4-specific ; GO:0034721 | circadian regulation of gene expression ; GO:0032922 | positive regulation of transcription, DNA-templated ; GO:0045893 | synaptonemal complex organization ; GO:0070193 | histone H3-K9 a…	DNA binding ; GO:0003677 | histone demethylase activity (H3-trimethyl-K4 specific) ; GO:0034647 | histone acetyltransferase activity (H3-K9 specific) ; GO:0043992 | histone demethylase activity (H4-R3 specific) ; GO:0033749 | protein binding ; GO:0005515 | histone demethylase activity (H3-K4 specific) ; GO:0032453 | ihistone demethylase activity ; GO:0032452
				FBgn0024227	aurora B	aurB	histone H3-S28 phosphorylation ; GO:0043988 | positive regulation of cytokinesis ; GO:0032467 | mitotic spindle assembly checkpoint ; GO:0007094 | chromatin organization ; GO:0006325 | mitotic cytokinesis ; GO:0000281 | mitotic spindle organization ; GO:0007052 | histone phosphorylation ; GO:0016572 | regulation of cytokinesis ; GO:0032465 | midbody abscission ; GO:0061952 | female germ-line stem…	ATP binding ; GO:0005524 | protein serine/threonine kinase activity ; GO:0004674 | histone serine kinase activity ; GO:0035174 | protein serine/threonine/tyrosine kinase activity ; GO:0004712
				FBgn0022893	Decondensation factor 31	Df31	nucleosome assembly ; GO:0006334 | chromatin organization ; GO:0006325	histone binding ; GO:0042393
				FBgn0033210	U2A	U2A	mRNA splicing, via spliceosome ; GO:0000398 | chromatin organization ; GO:0006325 | mRNA splicing, via spliceosome ; GO:0000398 | spermatogenesis ; GO:0007283 | mitotic cell cycle ; GO:0000278	U2 snRNA binding ; GO:0030620
				FBgn0000581	Enhancer of Polycomb	E(Pc)	histone exchange ; GO:0043486 | dendrite guidance ; GO:0070983 | histone acetylation ; GO:0016573 | chromatin organization ; GO:0006325 | regulation of transcription by RNA polymerase II ; GO:0006357	histone acetyltransferase activity ; GO:0004402 | histone acetyltransferase activity ; GO:0004402
				FBgn0013756	Megator	Mtor	protein import into nucleus ; GO:0006606 | regulation of mitotic spindle assembly ; GO:1901673 | male germ-line stem cell asymmetric division ; GO:0048133 | regulation of mitotic spindle organization ; GO:0060236 | regulation of chromosome segregation ; GO:0051983 | mitotic spindle assembly checkpoint ; GO:0007094 | positive regulation of intracellular protein transport ; GO:0090316 | positive re…	protein binding ; GO:0005515 | structural constituent of nuclear pore ; GO:0017056 | ribonucleoprotein complex binding ; GO:0043021 | chromatin DNA binding ; GO:0031490 | protein binding ; GO:0005515
				FBgn0028683	spt4	spt4	negative regulation of DNA-templated transcription, elongation ; GO:0032785 | positive regulation of DNA-templated transcription, elongation ; GO:0032786 | mRNA processing ; GO:0006397 | chromatin organization ; GO:0006325 | negative regulation of transcription by RNA polymerase II ; GO:0000122 | transcription elongation from RNA polymerase II promoter ; GO:0006368 | positive regulation of transc…	zinc ion binding ; GO:0008270 | RNA polymerase II complex binding ; GO:0000993 |protein heterodimerization activity ; GO:0046982
				FBgn0011604	Imitation SWI	Iswi	chromatin remodeling ; GO:0006338 | positive regulation of transcription, DNA-templated ; GO:0045893 | regulation of transcription, DNA-templated ; GO:0006355 | nucleosome positioning ; GO:0016584 | sperm chromatin decondensation ; GO:0035041 | nucleosome mobilization ; GO:0042766 | nuclear speck organization ; GO:0035063 | ATP-dependent chromatin remodeling ; GO:0043044 | nucleosome assembly ; G…	nucleosome binding ; GO:0031491 | transcription factor binding ; GO:0008134 | DNA helicase activity ; GO:0003678 | protein binding ; GO:0005515 | DNA-dependent ATPase activity ; GO:0008094 | nucleosome-dependent ATPase activity ; GO:0070615 | DNA binding ; GO:0003677 | DNA-dependent ATPase activity ; GO:0008094 | nucleotide binding ; GO:0000166 | transcription factor binding ; GO:0008134 | nucleo…
				FBgn0086895	peanuts	pea	mRNA splicing, via spliceosome ; GO:0000398 | spliceosomal complex disassembly ; GO:0000390 | chromatin organization ; GO:0006325 | ventral cord development ; GO:0007419 | oogenesis ; GO:0048477 | regulation of alternative mRNA splicing, via spliceosome ; GO:0000381 | mRNA splicing, via spliceosome ; GO:0000398	RNA helicase activity ; GO:0003724 | RNA binding ; GO:0003723
				FBgn0010397	Lamin C	LamC	nuclear pore distribution ; GO:0031081 | muscle tissue morphogenesis ; GO:0060415 | male meiosis cytokinesis ; GO:0007112 | chromatin silencing ; GO:0006342 | tendon development ; GO:0035989 | regulation of actin filament polymerization ; GO:0030833 | chromatin organization ; GO:0006325	structural constituent of cytoskeleton ; GO:0005200
				FBgn0015602	Boundary element-associated factor of 32kD	BEAF-32	regulation of transcription by RNA polymerase II ; GO:0006357 | chromatin organization ; GO:0006325 | oogenesis ; GO:0048477 | histone H3-K9 methylation ; GO:0051567	chromatin insulator sequence binding ; GO:0043035 | DNA binding ; GO:0003677 | protein binding ; GO:0005515
				FBgn0003044	Polycomblike	Pcl	negative regulation of transcription, DNA-templated ; GO:0045892 | chromatin organization ; GO:0006325 | defense response to fungus ; GO:0050832 | regulation of transcription, DNA-templated ; GO:0006355 | ventral cord development ; GO:0007419	chromatin binding ; GO:0003682 | methylated histone binding ; GO:0035064 | protein binding ; GO:0005515 | DNA-binding transcription factor activity ; GO:0003700 | DNA binding ; GO:0003677
				FBgn0261119	Pre-RNA processing factor 19	Prp19	DNA repair ; GO:0006281 | mRNA splicing, via spliceosome ; GO:0000398 | generation of catalytic spliceosome for first transesterification step ; GO:0000349 | chromatin organization ; GO:0006325 | regulation of alternative mRNA splicing, via spliceosome ; GO:0000381 | protein ubiquitination ; GO:0016567	ubiquitin protein ligase activity ; GO:0061630 | ubiquitin-protein transferase activity ; GO:0004842
				FBgn0004362	High mobility group protein D	HmgD	DNA recombination ; GO:0006310 | positive regulation of transcription by RNA polymerase II ; GO:0045944 | positive regulation of innate immune response ; GO:0045089 | regulation of transcription by RNA polymerase II ; GO:0006357 | chromatin remodeling ; GO:0006338 | chromatin organization ; GO:0006325 | regulation of transcription, DNA-templated ; GO:0006355	DNA binding ; GO:0003677 | DNA binding, bending ; GO:0008301 | AT DNA binding ; GO:0003680 | transcription factor binding ; GO:0008134
				FBgn0025682	supercoiling factor	scf	chromatin organization ; GO:0006325 | dosage compensation by hyperactivation of X chromosome ; GO:0009047 | positive regulation of DNA topoisomerase (ATP-hydrolyzing) activity ; GO:2000373 | DNA topological change ; GO:0006265 | positive regulation of transcription, DNA-templated ; GO:0045893	calcium ion binding ; GO:0005509
				FBgn0035829	Heterochromatin protein 4	HP4	chromatin organization ; GO:0006325	-
				FBgn0020412	JIL-1 kinase	JIL-1	chromosome organization ; GO:0051276 | protein autophosphorylation ; GO:0046777 | peptidyl-serine phosphorylation ; GO:0018105 | intracellular signal transduction ; GO:0035556 | chromatin organization ; GO:0006325 | histone phosphorylation ; GO:0016572 | telomere maintenance ; GO:0000723 | protein phosphorylation ; GO:0006468 | negative regulation of chromatin silencing ; GO:0031936 | oogenesis ;…	ATP binding ; GO:0005524 | histone kinase activity (H3-S10 specific) ; GO:0035175 | protein serine/threonine kinase activity ; GO:0004674 | protein binding ; GO:0005515
				FBgn0002466	sticky	sti	intracellular signal transduction ; GO:0035556 | regulation of actin cytoskeleton organization ; GO:0032956 | mitotic cytokinesis ; GO:0000281 | peptidyl-threonine phosphorylation ; GO:0018107 | regulation of cytokinesis ; GO:0032465 | actomyosin contractile ring assembly ; GO:0000915 | ventral cord development ; GO:0007419 | regulation of cytokinesis, actomyosin contractile ring assembly ; GO:20…	ATP binding ; GO:0005524 | protein serine/threonine kinase activity ; GO:0004674
				FBgn0003459	stonewall	stwl	heterochromatin organization ; GO:0070828 | larval lymph gland hemopoiesis ; GO:0035167 | female germ-line stem cell population maintenance ; GO:0036099 | negative regulation of transcription, DNA-templated ; GO:0045892 | germ-line stem cell population maintenance ; GO:0030718 | chromatin organization ; GO:0006325 | regulation of transcription by RNA polymerase II ; GO:0006357 | germ-line stem ce…	DNA binding ; GO:0003677
				FBgn0013717	non-stop	not	histone deubiquitination ; GO:0016578 | glial cell migration ; GO:0008347 | axon guidance ; GO:0007411 | axon target recognition ; GO:0007412 | positive regulation of transcription, DNA-templated ; GO:0045893 | ubiquitin-dependent protein catabolic process ; GO:0006511 | protein deubiquitination ; GO:0016579 | glial cell development ; GO:0021782 | regulation of transcription, DNA-templated ; GO:0…	zinc ion binding ; GO:0008270 | protein binding ; GO:0005515 | thiol-dependent ubiquitin-specific protease activity ; GO:0004843 |thiol-dependent ubiquitinyl hydrolase activity ; GO:0036459
				FBgn0036804	SAGA associated factor 11kDa	Sgf11	histone deubiquitination ; GO:0016578 | positive regulation of transcription, DNA-templated ; GO:0045893 | regulation of transcription, DNA-templated ; GO:0006355 | chromatin organization ; GO:0006325	transcription coactivator activity ; GO:0003713 | protein binding ; GO:0005515
				FBgn0029094	anti-silencing factor 1	asf1	nucleosome assembly ; GO:0006334 | inferred from mutant phenotype <newline> chromatin organization ; GO:0006325 | inferred from direct assay <newline> regulation of mRNA splicing, via spliceosome ; GO:0048024 | inferred from mutant phenotype <newline> chromatin organization ; GO:0006325 | inferred from genetic interaction with Tlk <newline> negative regulation of transcription by RNA polymerase I…	protein binding ; GO:0005515 | RNA polymerase II repressing transcription factor binding ; GO:0001103
				FBgn0260397	Suppressor of variegation 3-3	Su(var)3-3	oxidation-reduction process ; GO:0055114 | gene silencing ; GO:0016458 | oogenesis ; GO:0048477 | imaginal disc-derived wing vein specification ; GO:0007474 | histone H3-K4 demethylation ; GO:0034720 | positive regulation of transcription by RNA polymerase II ; GO:0045944 | positive regulation of methylation-dependent chromatin silencing ; GO:0090309 | chromatin organization ; GO:0006325 | negati…	DNA binding ; GO:0003677 | chromatin binding ; GO:0003682 | oxidoreductase activity ; GO:0016491 | histone demethylase activity (H3-K4 specific) ; GO:0032453 | transcription factor binding ; GO:0008134 | protein binding ; GO:0005515 | flavin adenine dinucleotide binding ; GO:0050660 | histone demethylase activity (H3-dimethyl-K4 specific) ; GO:0034648
				FBgn0037573	-	CG7483	RNA splicing ; GO:0008380 | pole plasm oskar mRNA localization ; GO:0045451 | chromatin organization ; GO:0006325 | mRNA splicing, via spliceosome ; GO:0000398 | exon-exon junction complex assembly ; GO:1903040 | positive regulation of gene expression ; GO:0010628	ATP binding ; GO:0005524 | RNA helicase activity ; GO:0003724 | mRNA binding ; GO:0003729 | protein binding ; GO:0005515 |RNA binding ; GO:0003723
				FBgn0015396	jumeau	jumu	regulation of transcription, DNA-templated ; GO:0006355 | imaginal disc-derived wing morphogenesis ; GO:0007476 | nucleolus organization ; GO:0007000 | defense response to fungus ; GO:0050832 | chromatin organization ; GO:0006325 | dorsal closure ; GO:0007391 | compound eye development ; GO:0048749 | regulation of cell division ; GO:0051302 |embryonic heart tube development ; GO:0035050	DNA-binding transcription factor activity ; GO:0003700 | transcription regulatory region sequence-specific DNA binding ; GO:0000976
				FBgn0037831	Chromosome associated protein H2	Cap-H2	chromosome organization ; GO:0051276 | chromatin organization ; GO:0006325 | mitotic sister chromatid separation ; GO:0051306 | chromosome organization ; GO:0051276 | meiotic chromosome condensation ; GO:0010032 | chromosome separation ; GO:0051304 | male meiosis chromosome segregation ; GO:0007060	chromatin binding ; GO:0003682 | protein binding ; GO:0005515
				FBgn0263755	Suppressor of variegation 3-9	Su(var)3-9	chromatin organization ; GO:0006325 | histone H3-K9 methylation ; GO:0051567 | histone methylation ; GO:0016571 | heterochromatin organization involved in chromatin silencing ; GO:0070868 | chromatin silencing ; GO:0006342 | gene silencing ; GO:0016458 | female germ-line stem cell asymmetric division ; GO:0048132 | histone modification ; GO:0016570 | histone H3-K9 methylation ; GO:0051567 | histo…	zinc ion binding ; GO:0008270 | histone methyltransferase activity (H3-K9 specific) ; GO:0046974 | histone methyltransferase activity ; GO:0042054 | chromatin binding ; GO:0003682
				FBgn0039004	Nucleoporin 133kD	Nup133	regulation of transcription, DNA-templated ; GO:0006355 | RNA export from nucleus ; GO:0006405 | nuclear pore distribution ; GO:0031081 | protein import into nucleus ; GO:0006606 | transcription-dependent tethering of RNA polymerase II gene DNA at nuclear periphery ; GO:0000972 | mRNA export from nucleus ; GO:0006406	structural constituent of nuclear pore ; GO:0017056
				FBgn0023097	bonus	bon	chromatin organization ; GO:0006325 | axon guidance ; GO:0007411 | protein ubiquitination ; GO:0016567	zinc ion binding ; GO:0008270 | ubiquitin-protein transferase activity ; GO:0004842 | chromatin binding ; GO:0003682
				FBgn0000541	Enhancer of bithorax	E(bx)	chromatin remodeling ; GO:0006338 | regulation of transcription by RNA polymerase II ; GO:0006357 | transcription, DNA-templated ; GO:0006351 | ecdysone receptor-mediated signaling pathway ; GO:0035076 | nucleosome mobilization ; GO:0042766 | regulation of gene expression ; GO:0010468 | negative regulation of receptor signaling pathway via JAK-STAT ; GO:0046426 | negative regulation of innate imm…	RNA polymerase II proximal promoter sequence-specific DNA binding ; GO:0000978 | lysine-acetylated histone binding ; GO:0070577 | nucleosome-dependent ATPase activity ; GO:0070615 | nuclear receptor binding ; GO:0016922 | methylated histone binding ; GO:0035064
				FBgn0015218	eukaryotic translation initiation factor 4E1	eIF4E1	translation ; GO:0006412 | RNA metabolic process ; GO:0016070 | translational initiation ; GO:0006413	protein binding ; GO:0005515 | translation initiation factor activity ; GO:0003743 | RNA 7-methylguanosine cap binding ; GO:0000340 | RNA cap binding ; GO:0000339 | eukaryotic initiation factor 4G binding ; GO:0031370
				FBgn0020306	domino	dom	wing disc pattern formation ; GO:0035222 | oogenesis ; GO:0048477 | ATP-dependent chromatin remodeling ; GO:0043044 | dendrite morphogenesis ; GO:0048813 | male germ-line stem cell population maintenance ; GO:0036098 | histone acetylation ; GO:0016573 | hemopoiesis ; GO:0030097 | chromatin remodeling ; GO:0006338 | dendrite guidance ; GO:0070983 | gene silencing ; GO:0016458 | chromatin organizat…	ATP binding ; GO:0005524 | protein binding ; GO:0005515 | ATPase activity ; GO:0016887 | histone binding ; GO:0042393 | DNA-dependent ATPase activity ; GO:0008094 | histone acetyltransferase activity ; GO:0004402
				FBgn0052075	-	CG32075	maturation of LSU-rRNA ; GO:0000470 | maturation of 5.8S rRNA ; GO:0000460	-
				FBgn0004183	small nuclear RNA U1 at 82Eb	snRNA:U1:82Eb	mRNA splicing, via spliceosome ; GO:0000398 | chromatin organization ; GO:0006325	-
		GO:0042052	rhabdomere development | rhabdomere organization. The assembly and arrangement of a rhabdomere within a cell. The rhabdomere is the organelle on the apical surface of a photoreceptor cell that contains the visual pigments.	FBgn0004102	ocelliless	oc	embryonic development via the syncytial blastoderm ; GO:0001700 | nervous system development ; GO:0007399 | ventral cord development ; GO:0007419 |positive regulation of gene expression ; GO:0010628 | photoreceptor cell fate commitment ; GO:0046552 | adult walking behavior ; GO:0007628 | ocellus morphogenesis ; GO:0048816 | ocellus development ; GO:0008056 | anterior region determination ; GO:000…	sequence-specific DNA binding ; GO:0043565 | protein heterodimerization activity ; GO:0046982 | protein homodimerization activity ; GO:0042803 | DNA-binding transcription activator activity, RNA polymerase II-specific ; GO:0001228
				FBgn0011661	Moesin	Moe	oocyte anterior/posterior axis specification ; GO:0007314 | regulation of cell shape ; GO:0008360 | positive regulation of mitotic spindle elongation ; GO:1902846 | pole plasm protein localization ; GO:0007318 | establishment or maintenance of apical/basal cell polarity ; GO:0035088 | microtubule anchoring ; GO:0034453 | positive regulation of endocytosis ; GO:0045807 | cytoskeleton organization …	microtubule binding ; GO:0008017 | phosphatidylinositol-4,5-bisphosphate binding ; GO:0005546 | actin binding ; GO:0003779 | protein binding ; GO:0005515
				FBgn0027335	Rab11 interacting protein	Rip11	rhabdomere development ; GO:0042052 | regulated exocytosis ; GO:0045055	Rab GTPase binding ; GO:0017137
				FBgn0023489	PvuII-PstI homology 13	Pph13	compound eye photoreceptor development ; GO:0042051 | rhabdomere development ; GO:0042052 | ocellus photoreceptor cell development ; GO:0042463 | positive regulation of transcription by RNA polymerase II ; GO:0045944 | photoreceptor cell development ; GO:0042461 | positive regulation of transcription, DNA-templated ; GO:0045893 | regulation of rhodopsin gene expression ; GO:0007468	RNA polymerase II regulatory region sequence-specific DNA binding ; GO:0000977 | DNA-binding transcription activator activity, RNA polymerase II-specific ; GO:0001228 | protein homodimerization activity ; GO:0042803 | DNA-binding transcription factor activity, RNA polymerase II-specific ; GO:0000981
				FBgn0032292	ER membrane protein complex subunit 3	EMC3	rhabdomere development ; GO:0042052 | rhodopsin biosynthetic process ; GO:0016063 | wound healing ; GO:0042060
				FBgn0022960	visceral mesodermal armadillo-repeats	vimar	rhabdomere development ; GO:0042052 | muscle cell cellular homeostasis ; GO:0046716 | positive regulation of neuron death ; GO:1901216 |positive regulation of GTPase activity ; GO:0043547 | inferred from biological aspect of ancestor with PANTHER:PTN000102921	GTPase activator activity ; GO:0005096
				FBgn0033179	p47	p47	nuclear envelope reassembly ; GO:0031468 | nuclear envelope reassembly ; GO:0031468 | membrane fusion ; GO:0061025 | autophagosome assembly ; GO:0000045 | rhabdomere development ; GO:0042052 | proteasome-mediated ubiquitin-dependent protein catabolic process ; GO:0043161 | Golgi organization ; GO:0007030	ubiquitin binding ; GO:0043130
				FBgn0261397	dilute class unconventional myosin	didum	intracellular protein transport ; GO:0006886 | actin filament-based movement ; GO:0030048 | sperm individualization ; GO:0007291 | positive regulation of pole plasm oskar mRNA localization ; GO:0045856 | anterior/posterior axis specification, embryo ; GO:0008595 | oogenesis ; GO:0048477 | rhabdomere development ; GO:0042052 | mitochondrion transport along microtubule ; GO:0047497	actin filament binding ; GO:0051015 | motor activity ; GO:0003774 | ATP binding ; GO:0005524 | actin-dependent ATPase activity ; GO:0030898 | calcium-dependent ATPase activity ; GO:0030899 | myosin light chain binding ; GO:0032027 | actin binding ; GO:0003779 | calmodulin binding ; GO:0005516
				FBgn0027356	Amphiphysin	Amph	rhabdomere development ; GO:0042052 | rhabdomere membrane biogenesis ; GO:0045313 | regulation of muscle contraction ; GO:0006937 | synaptic vesicle endocytosis ; GO:0048488 | exocytosis ; GO:0006887 | protein localization ; GO:0008104	phospholipid binding ; GO:0005543
				FBgn0020391	Neurospecific receptor kinase	Nrk	regulation of MAPK cascade ; GO:0043408 | nervous system development ; GO:0007399 | protein phosphorylation ; GO:0006468 | multicellular organism development ; GO:0007275 | positive regulation of neuron projection development ; GO:0010976 | positive regulation of kinase activity ; GO:0033674 | positive regulation of MAPK cascade ; GO:0043410 | positive regulation of phosphatidylinositol 3-kinase …	ATP binding ; GO:0005524 | protein tyrosine kinase activity ; GO:0004713 | transmembrane receptor protein tyrosine kinase activity ; GO:0004714
				FBgn0034070	SP2353	SP2353	negative regulation of innate immune response ; GO:0045824 | motor neuron axon guidance ; GO:0008045 | rhabdomere development ; GO:0042052 | animal organ morphogenesis ; GO:0009887 | tissue development ; GO:0009888 | dendrite development ; GO:0016358 | defense response to Gram-negative bacterium ; GO:0050829 | muscle cell cellular homeostasis ; GO:0046716	calcium ion binding ; GO:0005509
				FBgn0015754	Lissencephaly-1	Lis-1	photoreceptor cell axon guidance ; GO:0072499 | centrosome separation ; GO:0051299 | protein localization ; GO:0008104 | dorsal appendage formation ; GO:0046843 | nuclear migration along microtubule ; GO:0030473 | spindle assembly ; GO:0051225 | fusome organization ; GO:0045478 | regulation of dendrite morphogenesis ; GO:0048814 | cytoplasmic transport, nurse cell to oocyte ; GO:0007303 | microtu…	dynein complex binding ; GO:0070840 | microtubule plus-end binding ; GO:0051010
				FBgn0034135	Syntrophin-like 2	Syn2	rhabdomere development ; GO:0042052 | eye development ; GO:0001654 | locomotion ; GO:0040011 | regulation of synaptic growth at neuromuscular junction ; GO:0008582	structural constituent of muscle ; GO:0008307
				FBgn0265487	muscleblind	mbl	apoptotic process ; GO:0006915 | regulation of alternative mRNA splicing, via spliceosome ; GO:0000381 | regulation of gene expression ; GO:0010468 | muscle organ development ; GO:0007517 | regulation of female receptivity ; GO:0045924 | rhabdomere development ; GO:0042052 | eye development ; GO:0001654 | compound eye photoreceptor cell differentiation ; GO:0001751 | muscle cell cellular homeosta…	metal ion binding ; GO:0046872 | nucleic acid binding ; GO:0003676 | RNA binding ; GO:0003723
				FBgn0259211	grainy head	grh	ventral cord development ; GO:0007419 | chitin-based cuticle development ; GO:0040003 | positive regulation of transcription by RNA polymerase II ; GO:0045944 | rhabdomere development ; GO:0042052 | epithelial cell morphogenesis ; GO:0003382 | open tracheal system development ; GO:0007424 | nervous system development ; GO:0007399 | ganglion mother cell fate determination ; GO:0007402 | tracheal o…	sequence-specific DNA binding ; GO:0043565 | DNA binding ; GO:0003677 | DNA-binding transcription factor activity ; GO:0003700 |protein homodimerization activity ; GO:0042803
				FBgn0011726	twinstar	tsr	mitotic cytokinesis ; GO:0000281 | establishment of imaginal disc-derived wing hair orientation ; GO:0001737 | mushroom body development ; GO:0016319 | actin filament polymerization ; GO:0030041 | regulation of lamellipodium assembly ; GO:0010591 | actin filament depolymerization ; GO:0030042 | actin filament organization ; GO:0007015 | axonogenesis ; GO:0007409 | centrosome separation ; GO:00512…	actin binding ; GO:0003779
				FBgn0010333	Rac1	Rac1	actin filament organization ; GO:0007015 | dendrite morphogenesis ; GO:0048813 | axon guidance ; GO:0007411 | peripheral nervous system development ; GO:0007422 | neuron projection morphogenesis ; GO:0048812 | salivary gland morphogenesis ; GO:0007435 | neuron projection development ; GO:0031175 | actin cytoskeleton organization ; GO:0030036 | glial cell migration ; GO:0008347 | cell morphogenesi…	protein kinase binding ; GO:0019901 | GTPase activating protein binding ; GO:0032794 | GTPase activity ; GO:0003924 | protein binding ; GO:0005515 | GTP binding ; GO:0005525
				FBgn0016081	furry	fry	oocyte morphogenesis ; GO:0048601 | regulation of dendrite development ; GO:0050773 | chaeta morphogenesis ; GO:0008407 | rhabdomere development ; GO:0042052 | non-sensory hair organization ; GO:0035316 | positive regulation of protein kinase activity ; GO:0045860 | imaginal disc-derived wing hair organization ; GO:0035317 | neuron projection development ; GO:0031175 | dendrite self-avoidance ; G…	protein binding ; GO:0005515
				FBgn0259481	Mob2	Mob2	long-term memory ; GO:0007616 | rhabdomere development ; GO:0042052 | negative regulation of synaptic growth at neuromuscular junction ; GO:0045886 | cell morphogenesis ; GO:0000902	protein kinase binding ; GO:0019901 | protein binding ; GO:0005515
				FBgn0264006	dyschronic	dysc	positive regulation of ion transmembrane transporter activity ; GO:0032414 | rhabdomere development ; GO:0042052 | regulation of synaptic growth at neuromuscular junction ; GO:0008582 | locomotor rhythm ; GO:0045475 | muscle cell cellular homeostasis ; GO:0046716 | negative regulation of neuromuscular synaptic transmission ; GO:1900074 | photoreceptor cell axon guidance ; GO:0072499 | sensory per…
				FBgn0001108	Dynactin 1, p150 subunit	DCTN1-p150	retrograde axonal transport ; GO:0008090 | retrograde neuronal dense core vesicle transport ; GO:1990049 | lumen formation, open tracheal system ; GO:0035149 | spindle assembly ; GO:0051225 | cellularization ; GO:0007349 | rhabdomere development ; GO:0042052 | centrosome localization ; GO:0051642 | positive regulation of axonogenesis ; GO:0050772 | compound eye photoreceptor cell differentiation …	microtubule binding ; GO:0008017 | dynein complex binding ; GO:0070840 | dynein intermediate chain binding ; GO:0045505
				FBgn0261714	Calphotin	Cpn	sequestering of calcium ion ; GO:0051208 | inferred from direct assay inferred from mutant phenotype <newline> rhabdomere development ; GO:0042052 | inferred from mutant phenotype <newline> sequestering of calcium ion ; GO:0051208 | inferred by curator from GO:0005509	calcium ion binding ; GO:0005509
				FBgn0002940	neither inactivation nor afterpotential E	ninaE	visual perception ; GO:0007601 | photoreceptor cell morphogenesis ; GO:0008594 | negative regulation of compound eye retinal cell programmed cell death ; GO:0046673 | phototransduction ; GO:0007602 | cellular response to light stimulus ; GO:0071482 | detection of UV ; GO:0009589 | phospholipase C-activating rhodopsin mediated signaling pathway ; GO:0030265 | thermotaxis ; GO:0043052 | G protein-c…	protein binding ; GO:0005515 | G protein-coupled photoreceptor activity ; GO:0008020
				FBgn0259685	crumbs	crb	apical constriction ; GO:0003383 | protein stabilization ; GO:0050821 | centrosome localization ; GO:0051642 | establishment or maintenance of polarity of embryonic epithelium ; GO:0016332 | establishment or maintenance of cell polarity ; GO:0007163 | cell morphogenesis involved in Malpighian tubule morphogenesis ; GO:0061336 | zonula adherens assembly ; GO:0045186 | rhabdomere development ; GO:0…	calcium ion binding ; GO:0005509 | spectrin binding ; GO:0030507 | protein kinase C binding ; GO:0005080 | Notch binding ; GO:0005112
				FBgn0039270	Poly-glutamine tract binding protein 1	PQBP1	microvillus organization ; GO:0032528 | rhabdomere development ; GO:0042052 | olfactory learning ; GO:0008355 | mRNA splicing, via spliceosome ; GO:0000398 |positive regulation of translation ; GO:0045727	-
				FBgn0026379	Phosphatase and tensin homolog	Pten	phosphatidylinositol dephosphorylation ; GO:0046856 | negative regulation of phosphatidylinositol 3-kinase signaling ; GO:0014067 | regulation of cell junction assembly ; GO:1901888 | lipid homeostasis ; GO:0055088 | larval midgut histolysis ; GO:0035069 | negative regulation of multicellular organism growth ; GO:0040015 | negative regulation of insulin receptor signaling pathway ; GO:0046627 | r…	protein tyrosine/serine/threonine phosphatase activity ; GO:0008138 | protein tyrosine phosphatase activity ; GO:0004725 | phosphatidylinositol-3,4,5-trisphosphate 3-phosphatase activity ; GO:0016314 | inositol-1,3,4,5-tetrakisphosphate 3-phosphatase activity ; GO:0051717 | phosphoprotein phosphatase activity ; GO:0004721 | protein serine/threonine phosphatase activity ; GO:0004722 | PDZ domain b…
				FBgn0026252	moleskin	msk	protein import into nucleus ; GO:0006606 | imaginal disc-derived wing vein morphogenesis ; GO:0008586 | protein import into nucleus ; GO:0006606 | ommatidial rotation ; GO:0016318 | muscle attachment ; GO:0016203 | compound eye cone cell differentiation ; GO:0042675 | negative regulation of neuron apoptotic process ; GO:0043524 | imaginal disc-derived wing morphogenesis ; GO:0007476 | rhabdomere …	Ran GTPase binding ; GO:0008536 | U4 snRNA binding ; GO:0030621 | protein binding ; GO:0005515 | U1 snRNA binding ; GO:0030619 | U2 snRNA binding ; GO:0030620
				FBgn0259210	prominin	prom	rhabdomere development ; GO:0042052	-
				FBgn0086253	rumi	rumi	positive regulation of Notch signaling pathway ; GO:0045747 | negative regulation of Notch signaling pathway ; GO:0045746 | protein O-linked glycosylation via serine ; GO:0018242 | protein O-linked glycosylation ; GO:0006493 | rhabdomere development ; GO:0042052 | muscle tissue development ; GO:0060537 | regulation of stem cell division ; GO:2000035 | protein glycosylation in endoplasmic reticulu…	glucosyltransferase activity ; GO:0046527 | UDP-xylosyltransferase activity ; GO:0035252 | UDP-glucosyltransferase activity ; GO:0035251
				FBgn0261458	capulet	capt	photoreceptor cell axon guidance ; GO:0072499 |actin filament organization ; GO:0007015 | chaeta morphogenesis ; GO:0008407 | wing disc dorsal/ventral pattern formation ; GO:0048190 | compound eye development ; GO:0048749 | cell morphogenesis ; GO:0000902 | actin polymerization or depolymerization ; GO:0008154 | rhabdomere development ; GO:0042052 | cell morphogenesis ; GO:0000902 | muscle cell c…	adenylate cyclase binding ; GO:0008179 | actin binding ; GO:0003779
				FBgn0015790	Rab11	Rab11	protein localization to membrane ; GO:0072657 | adherens junction maintenance ; GO:0034334 | actin cytoskeleton reorganization ; GO:0031532 | fusome organization ; GO:0045478 | cellularization ; GO:0007349 | regulation of pole plasm oskar mRNA localization ; GO:0007317 | germ-line stem cell population maintenance ; GO:0030718 | male meiosis cytokinesis ; GO:0007112 | oocyte microtubule cytoskelet…	GTP binding ; GO:0005525 | GTPase activity ; GO:0003924 | GTPase activating protein binding ; GO:0032794 | protein binding ; GO:0005515 | protein-containing complex binding ; GO:0044877 | protein binding ; GO:0005515 | GTPase activity ; GO:0003924 | GTPase activating protein binding ; GO:0032794 | protein binding ; GO:0005515
				FBgn0031414	eyes shut	eys	cell morphogenesis ; GO:0000902 | temperature compensation of the circadian clock ; GO:0010378 | rhabdomere development ; GO:0042052
		GO:0008103	oocyte microtubule cytoskeleton polarization. Establishment and maintenance of a specific axis of polarity of the oocyte microtubule network. The axis is set so that the minus and plus ends of the microtubules of the mid stage oocyte are positioned along the anterior cortex and at the posterior pole, respectively. An example of this is found in Drosophila melanogaster.	FBgn0000319	Clathrin heavy chain	Chc	intracellular protein transport ; GO:0006886 | clathrin coat assembly ; GO:0048268 | secretory granule organization ; GO:0033363 | endocytosis ; GO:0006897 | liquid clearance, open tracheal system ; GO:0035002 | compound eye retinal cell programmed cell death ; GO:0046667 | regulation of growth ; GO:0040008 | positive regulation of autophagy ; GO:0010508 | pole plasm oskar mRNA localization ; GO:…	structural molecule activity ; GO:0005198 | protein binding ; GO:0005515 | clathrin light chain binding ; GO:0032051
				FBgn0261064	Rabenosyn-5	Rbsn-5	endosomal vesicle fusion ; GO:0034058 | plasma membrane to endosome transport ; GO:0048227 | pole plasm oskar mRNA localization ; GO:0045451 | endocytosis ; GO:0006897 | oocyte microtubule cytoskeleton polarization ; GO:0008103 | regulation of endocytosis ; GO:0030100 |establishment of imaginal disc-derived wing hair orientation ; GO:0001737	nucleic acid binding ; GO:0003676 | metal ion binding ; GO:0046872 | small GTPase binding ; GO:0031267 | protein binding ; GO:0005515
				FBgn0000273	Protein kinase, cAMP-dependent, catalytic subunit 1	Pka-C1	thermosensory behavior ; GO:0040040 | sprouting of injured axon ; GO:0048682 | positive regulation of smoothened signaling pathway ; GO:0045880 | regulation of pole plasm oskar mRNA localization ; GO:0007317 | regulation of circadian sleep/wake cycle, sleep ; GO:0045187 | protein phosphorylation ; GO:0006468 | regulation of apoptotic process ; GO:0042981 | oogenesis ; GO:0048477 | oocyte anterior…	ATP binding ; GO:0005524 | protein binding ; GO:0005515 | protein serine/threonine kinase activity ; GO:0004674 | cAMP-dependent protein kinase activity ; GO:0004691 | protein kinase A regulatory subunit binding ; GO:0034237
				FBgn0015797	Rab6	Rab6	Rab protein signal transduction ; GO:0032482 | compound eye morphogenesis ; GO:0001745 | oocyte microtubule cytoskeleton polarization ; GO:0008103 | vesicle-mediated transport ; GO:0016192 | R7 cell development ; GO:0045467 | retrograde vesicle-mediated transport, Golgi to endoplasmic reticulum ; GO:0006890 | intracellular protein transport ; GO:0006886 | phototransduction ; GO:0007602 | pole pla…	GTP binding ; GO:0005525 | GTPase activity ; GO:0003924 | protein binding ; GO:0005515
				FBgn0000183	Bicaudal D	BicD	oogenesis ; GO:0048477 | regulation of endocytosis ; GO:0030100 | synaptic vesicle endocytosis ; GO:0048488 | germarium-derived oocyte fate determination ; GO:0007294 | oocyte microtubule cytoskeleton organization ; GO:0016325 | positive regulation of synaptic vesicle exocytosis ; GO:2000302 | positive regulation of clathrin-dependent endocytosis ; GO:2000370 |intracellular mRNA localization ; GO…	cytoskeletal adaptor activity ; GO:0008093 | dynein complex binding ; GO:0070840 | Rab GTPase binding ; GO:0017137 | mRNA binding ; GO:0003729 | clathrin heavy chain binding ; GO:0032050 | protein binding ; GO:0005515
				FBgn0004907	14-3-3zeta	14-3-3zeta	mitotic cell cycle, embryonic ; GO:0045448 | thermosensory behavior ; GO:0040040 | chromosome segregation ; GO:0007059 | cytoplasmic sequestering of transcription factor ; GO:0042994 | learning or memory ; GO:0007611 | protein folding ; GO:0006457 | oocyte microtubule cytoskeleton polarization ; GO:0008103 | olfactory learning ; GO:0008355 | positive regulation of hippo signaling ; GO:0035332 | p…	protein domain specific binding ; GO:0019904 | protein homodimerization activity ; GO:0042803 | protein binding ; GO:0005515 | protein heterodimerization activity ; GO:0046982 | transcription factor binding ; GO:0008134 | protein kinase C inhibitor activity ; GO:0008426
				FBgn0001308	Kinesin heavy chain	Khc	intracellular distribution of mitochondria ; GO:0048312 | pole plasm oskar mRNA localization ; GO:0045451 | anterograde axonal transport of mitochondrion ; GO:0098957 | axo-dendritic transport ; GO:0008088 | stress granule disassembly ; GO:0035617 | mitochondrion distribution ; GO:0048311 | pole plasm oskar mRNA localization ; GO:0045451 | synaptic vesicle transport ; GO:0048489 | microtubule sli…	ATP binding ; GO:0005524 | ATP-dependent microtubule motor activity, plus-end-directed ; GO:0008574 | ATPase activity ; GO:0016887 | tropomyosin binding ; GO:0005523 | microtubule motor activity ; GO:0003777 | motor activity ; GO:0003774 | microtubule binding ; GO:0008017
				FBgn0016984	skittles	sktl	phosphatidylinositol metabolic process ; GO:0046488 | cellular protein localization ; GO:0034613 | basement membrane organization ; GO:0071711 | cortical actin cytoskeleton organization ; GO:0030866 | negative regulation of histone phosphorylation ; GO:0033128 | oocyte dorsal/ventral axis specification ; GO:0007310 | spermatid development ; GO:0007286 | oocyte microtubule cytoskeleton polarizatio…	1-phosphatidylinositol-4-phosphate 5-kinase activity ; GO:0016308 | protein binding ; GO:0005515
				FBgn0002736	mago nashi	mago	pole plasm assembly ; GO:0007315 | microtubule cytoskeleton organization ; GO:0000226 | mRNA splicing, via spliceosome ; GO:0000398 | RNA splicing ; GO:0008380 | pole plasm oskar mRNA localization ; GO:0045451 | oogenesis ; GO:0048477 | oocyte microtubule cytoskeleton polarization ; GO:0008103 | maintenance of pole plasm mRNA location ; GO:0046594 | oocyte microtubule cytoskeleton organization ; …	protein binding ; GO:0005515
				FBgn0259243	Protein kinase, cAMP-dependent, regulatory subunit type 1	Pka-R1	regulation of protein phosphorylation ; GO:0001932 | cAMP-mediated signaling ; GO:0019933 | molting cycle, chitin-based cuticle ; GO:0007591 | olfactory learning ; GO:0008355 | positive regulation of feeding behavior ; GO:2000253 | actin filament organization ; GO:0007015 | cGMP-mediated signaling ; GO:0019934 | neuromuscular synaptic transmission ; GO:0007274 | response to ethanol ; GO:0045471 |…	3',5'-cyclic-GMP phosphodiesterase activity ; GO:0047555 | cAMP-dependent protein kinase regulator activity ; GO:0008603
				FBgn0003015	oskar	osk	pole plasm assembly ; GO:0007315 | pole plasm protein localization ; GO:0007318 | visual learning ; GO:0008542 | oogenesis ; GO:0048477 | regulation of mRNA stability ; GO:0043488 | P granule organization ; GO:0030719 | pole cell formation ; GO:0007279 | positive regulation of translation ; GO:0045727 | long-term memory ; GO:0007616 | pole plasm mRNA localization ; GO:0019094 | germ cell developm…	mRNA binding ; GO:0003729
				FBgn0086371	poly	poly	tRNA wobble uridine modification ; GO:0002098 | positive regulation of insulin receptor signaling pathway ; GO:0046628 | oocyte microtubule cytoskeleton polarization ; GO:0008103 | melanotic encapsulation of foreign target ; GO:0035011	insulin receptor binding ; GO:0005158
				FBgn0020238	14-3-3epsilon	14-3-3epsilon	mitotic cell cycle checkpoint ; GO:0007093 | pole cell migration ; GO:0007280 | determination of adult lifespan ; GO:0008340 | DNA damage checkpoint ; GO:0000077 | positive regulation of Ras protein signal transduction ; GO:0046579 | response to UV ; GO:0009411 | imaginal disc development ; GO:0007444 | positive regulation of hippo signaling ; GO:0035332 | oocyte microtubule cytoskeleton polariza…	protein domain specific binding ; GO:0019904 | phosphoserine residue binding ; GO:0050815 | protein binding ; GO:0005515 | transcription factor binding ; GO:0008134 | protein heterodimerization activity ; GO:0046982
				FBgn0262975	cap-n-collar	cnc	positive regulation of transcription by RNA polymerase II ; GO:0045944 | head development ; GO:0060322 | response to oxidative stress ; GO:0006979 | intestinal stem cell homeostasis ; GO:0036335 | regulation of pole plasm oskar mRNA localization ; GO:0007317 | dendrite morphogenesis ; GO:0048813 | pharynx development ; GO:0060465 | blastoderm segmentation ; GO:0007350 | response to endoplasmic re…	DNA binding ; GO:0003677 | DNA-binding transcription factor activity ; GO:0003700 | protein heterodimerization activity ; GO:0046982
				FBgn0045862	barentsz	btz	mRNA processing ; GO:0006397 | bicoid mRNA localization ; GO:0045450 | oocyte microtubule cytoskeleton polarization ; GO:0008103 | pole plasm oskar mRNA localization ; GO:0045451 | pole plasm protein localization ; GO:0007318 | RNA splicing ; GO:0008380	RNA binding ; GO:0003723 | translation initiation factor binding ; GO:0031369
				FBgn0086362	spn-F	spn-F	chaeta morphogenesis ; GO:0008407 | oocyte anterior/posterior axis specification ; GO:0007314 | positive regulation of neuron remodeling ; GO:1904801 | cellular protein localization ; GO:0034613 | oocyte axis specification ; GO:0007309 | regulation of pole plasm oskar mRNA localization ; GO:0007317 | oocyte microtubule cytoskeleton organization ; GO:0016325 | oocyte microtubule cytoskeleton polar…	protein binding ; GO:0005515 | ATP-dependent microtubule motor activity, minus-end-directed ; GO:0008569
				FBgn0261458	capulet	capt	photoreceptor cell axon guidance ; GO:0072499 |actin filament organization ; GO:0007015 | chaeta morphogenesis ; GO:0008407 | wing disc dorsal/ventral pattern formation ; GO:0048190 | compound eye development ; GO:0048749 | cell morphogenesis ; GO:0000902 | actin polymerization or depolymerization ; GO:0008154 | rhabdomere development ; GO:0042052 | cell morphogenesis ; GO:0000902 | muscle cell c…	adenylate cyclase binding ; GO:0008179 | actin binding ; GO:0003779
				FBgn0015790	Rab11	Rab11	protein localization to membrane ; GO:0072657 | adherens junction maintenance ; GO:0034334 | actin cytoskeleton reorganization ; GO:0031532 | fusome organization ; GO:0045478 | cellularization ; GO:0007349 | regulation of pole plasm oskar mRNA localization ; GO:0007317 | germ-line stem cell population maintenance ; GO:0030718 | male meiosis cytokinesis ; GO:0007112 | oocyte microtubule cytoskelet…	GTP binding ; GO:0005525 | GTPase activity ; GO:0003924 | GTPase activating protein binding ; GO:0032794 | protein binding ; GO:0005515 | protein-containing complex binding ; GO:0044877 | protein binding ; GO:0005515 | GTPase activity ; GO:0003924 | GTPase activating protein binding ; GO:0032794 | protein binding ; GO:0005515
				FBgn0011224	hephaestus	heph	mRNA processing ; GO:0006397 | spermatid development ; GO:0007286 | imaginal disc-derived wing vein morphogenesis ; GO:0008586 | imaginal disc-derived wing margin morphogenesis ; GO:0008587 | negative regulation of oskar mRNA translation ; GO:0007319 | sperm individualization ; GO:0007291 | regulation of translation ; GO:0006417 | regulation of RNA splicing ; GO:0043484 |oocyte microtubule cytosk…	mRNA binding ; GO:0003729 | translation repressor activity, mRNA regulatory element binding ; GO:0000900 | mRNA 3'-UTR binding ; GO:0003730
	Males	GO:0030431	sleep | diapause | dormancy | lethargus. Any process in which an organism enters and maintains a periodic, readily reversible state of reduced awareness and metabolic activity. Usually accompanied by physical relaxation, the onset of sleep in humans and other mammals is marked by a change in the electrical activity of the brain.	FBgn0025633	-	CG13366	sarcomere organization ; GO:0045214 | wing disc development ; GO:0035220 | proboscis morphogenesis ; GO:0048734 | adult somatic muscle development ; GO:0007527 | notum morphogenesis ; GO:0048802 | actin cytoskeleton organization ; GO:0030036	-
				FBgn0029969	-	CG10932	pyruvate metabolic process ; GO:0006090 | fatty acid beta-oxidation ; GO:0006635 | fatty acid biosynthetic process ; GO:0006633	acetyl-CoA C-acyltransferase activity ; GO:0003988 | acetyl-CoA C-acetyltransferase activity ; GO:0003985
				FBgn0261277	retroactive	rtv	positive regulation of voltage-gated potassium channel activity ; GO:1903818 | sleep ; GO:0030431 | regulation of synaptic transmission, cholinergic ; GO:0032222 | chitin-based embryonic cuticle biosynthetic process ; GO:0008362 | regulation of tube architecture, open tracheal system ; GO:0035152 | regulation of tube diameter, open tracheal system ; GO:0035158 | open tracheal system development ;…	GPI anchor binding ; GO:0034235
				FBgn0001218	Heat shock 70-kDa protein cognate 3	Hsc70-3	response to unfolded protein ; GO:0006986 | RNA interference ; GO:0016246 | endoplasmic reticulum unfolded protein response ; GO:0030968 | chaperone cofactor-dependent protein refolding ; GO:0051085 | ubiquitin-dependent ERAD pathway ; GO:0030433 | protein refolding ; GO:0042026 | intestinal stem cell homeostasis ; GO:0036335 | response to endoplasmic reticulum stress ; GO:0034976 | cellular resp…	unfolded protein binding ; GO:0051082 | protein binding ; GO:0005515 | ATP binding ; GO:0005524 | ATPase activity ; GO:0016887 | misfolded protein binding ; GO:0051787 | protein folding chaperone ; GO:0044183 | ATPase activity, coupled ; GO:0042623 | heat shock protein binding ; GO:0031072
				FBgn0003301	rutabaga	rut	cAMP-mediated signaling ; GO:0019933 | adenylate cyclase-inhibiting G protein-coupled receptor signaling pathway ; GO:0007193 | learning or memory ; GO:0007611 | response to heat ; GO:0009408 | memory ; GO:0007613 | grooming behavior ; GO:0007625 | sleep ; GO:0030431 | determination of adult lifespan ; GO:0008340 | associative learning ; GO:0008306 | regulation of olfactory learning ; GO:0090328 …	calcium- and calmodulin-responsive adenylate cyclase activity ; GO:0008294 | adenylate cyclase activity ; GO:0004016
				FBgn0003380	Shaker	Sh	protein homooligomerization ; GO:0051260 | regulation of synaptic activity ; GO:0060025 | larval locomotory behavior ; GO:0008345 | potassium ion transmembrane transport ; GO:0071805 | positive regulation of membrane potential ; GO:0045838 | positive regulation of circadian sleep/wake cycle, sleep ; GO:0045938 | detection of visible light ; GO:0009584 | behavioral response to ether ; GO:0048150 |…	voltage-gated potassium channel activity ; GO:0005249 | voltage-gated cation channel activity ; GO:0022843 | delayed rectifier potassium channel activity ; GO:0005251
				FBgn0265784	Cyclic-AMP response element binding protein B	CrebB	medium-term memory ; GO:0072375 | regulation of circadian sleep/wake cycle, sleep ; GO:0045187 | thermosensory behavior ; GO:0040040 | long-term memory ; GO:0007616 | positive regulation of feeding behavior ; GO:2000253 | sleep ; GO:0030431 | positive regulation of transcription by RNA polymerase II ; GO:0045944 | learning or memory ; GO:0007611 | locomotor rhythm ; GO:0045475 | anesthesia-resist…	DNA-binding transcription factor activity ; GO:0003700 | DNA binding ; GO:0003677 | sequence-specific DNA binding ; GO:0043565
				FBgn0031030	Tao	Tao	ovarian follicle cell development ; GO:0030707 | protein phosphorylation ; GO:0006468 | activation of MAPKK activity ; GO:0000186 | response to cocaine ; GO:0042220 | positive regulation of endocytosis ; GO:0045807 | stress-activated protein kinase signaling cascade ; GO:0031098 | activation of protein kinase activity ; GO:0032147 | apoptotic process ; GO:0006915 | signal transduction by protein …	ATP binding ; GO:0005524 | protein serine/threonine kinase activity ; GO:0004674 | MAP kinase kinase kinase activity ; GO:0004709 | protein binding ; GO:0005515 | protein kinase activity ; GO:0004672
				FBgn0031220	-	CG4822	transmembrane transport ; GO:0055085	ATP binding ; GO:0005524 | ATPase activity ; GO:0016887 | ATPase-coupled transmembrane transporter activity ; GO:0042626
				FBgn0266557	kismet	kis	short-term memory ; GO:0007614 | positive regulation of organ growth ; GO:0046622 | positive regulation of receptor localization to synapse ; GO:1902685 | negative regulation of transcription, DNA-templated ; GO:0045892 | positive regulation of border follicle cell migration ; GO:1903688 | negative regulation of transcription by RNA polymerase II ; GO:0000122 | blastoderm segmentation ; GO:000735…	ATP binding ; GO:0005524 | DNA-dependent ATPase activity ; GO:0008094
				FBgn0043364	cabut	cbt	negative regulation of transcription by RNA polymerase II ; GO:0000122 | regulation of transcription by RNA polymerase II ; GO:0006357 | positive regulation of BMP signaling pathway ; GO:0030513 | wing disc morphogenesis ; GO:0007472 | wing disc dorsal/ventral pattern formation ; GO:0048190 | sensory organ development ; GO:0007423 | dorsal closure ; GO:0007391	sequence-specific DNA binding ; GO:0043565 | DNA-binding transcription factor activity, RNA polymerase II-specific ; GO:0000981
				FBgn0031261	nicotinic Acetylcholine Receptor beta3	nAChRbeta3	ion transmembrane transport ; GO:0034220 | chemical synaptic transmission ; GO:0007268 | nervous system process ; GO:0050877 | regulation of membrane potential ; GO:0042391 | signal transduction ; GO:0007165 |synaptic transmission, cholinergic ; GO:0007271	acetylcholine-gated cation-selective channel activity ; GO:0022848 | transmembrane signaling receptor activity ; GO:0004888
				FBgn0031275	metabotropic GABA-B receptor subtype 3	GABA-B-R3	gamma-aminobutyric acid signaling pathway ; GO:0007214 | sleep ; GO:0030431 | G protein-coupled receptor signaling pathway ; GO:0007186	transmembrane signaling receptor activity ; GO:0004888 | G protein-coupled GABA receptor activity ; GO:0004965
				FBgn0031305	Iris	Iris	-	-
				FBgn0014396	timeless	tim	circadian temperature homeostasis ; GO:0060086 | regulation of circadian sleep/wake cycle, sleep ; GO:0045187 | rhythmic behavior ; GO:0007622 | negative phototaxis ; GO:0046957 | negative regulation of transcription by RNA polymerase II ; GO:0000122 | DNA repair ; GO:0006281 | cellular response to light stimulus ; GO:0071482 | protein import into nucleus ; GO:0006606 | regulation of phagocytosis…	DNA binding ; GO:0003677 | protein binding ; GO:0005515 | protein heterodimerization activity ; GO:0046982 | transcription factor binding ; GO:0008134
				FBgn0003386	Shaker cognate w	Shaw	protein homooligomerization ; GO:0051260 | potassium ion transport ; GO:0006813 | sleep ; GO:0030431 |potassium ion transmembrane transport ; GO:0071805	voltage-gated potassium channel activity ; GO:0005249 | delayed rectifier potassium channel activity ; GO:0005251 | voltage-gated cation channel activity ; GO:0022843
				FBgn0031604	Elongator complex protein 3	Elp3	synaptic growth at neuromuscular junction ; GO:0051124 | cytoskeletal matrix organization at active zone ; GO:0048789 | locomotory behavior ; GO:0007626 | regulation of photoreceptor cell axon guidance ; GO:2000289 | histone acetylation ; GO:0016573 | regulation of transcription by RNA polymerase II ; GO:0006357 | peptidyl-lysine acetylation ; GO:0018394 | tRNA wobble base 5-methoxycarbonylmethyl…	iron-sulfur cluster binding ; GO:0051536 | acetyltransferase activity ; GO:0016407 | inphosphorylase kinase regulator activity ; GO:0008607
				FBgn0031836	-	CG11050	-	5'-deoxynucleotidase activity ; GO:0002953
				FBgn0031914	-	CG5973	-	phosphatidylinositol bisphosphate binding ; GO:1902936
				FBgn0016122	Angiotensin-converting enzyme-related	Acer	proteolysis ; GO:0006508 | regulation of heart rate ; GO:0002027 | proteolysis ; GO:0006508 | heart development ; GO:0007507 | sleep ; GO:0030431 | positive regulation of circadian sleep/wake cycle, sleep ; GO:0045938 | heart morphogenesis ; GO:0003007	peptidyl-dipeptidase activity ; GO:0008241 | dipeptidyl-peptidase activity ; GO:0008239 | metalloendopeptidase activity ; GO:0004222 | zinc ion binding ; GO:0008270 |exopeptidase activity ; GO:0008238
				FBgn0032169	-	CG4709	-	nucleic acid binding ; GO:0003676 | metal ion binding ; GO:0046872
				FBgn0259176	bunched	bun	regulation of transcription, DNA-templated ; GO:0006355 | ovarian follicle cell development ; GO:0030707 | negative regulation of apoptotic process ; GO:0043066 | positive regulation of neuroblast proliferation ; GO:0002052 | positive regulation of cell population proliferation ; GO:0008284 | mushroom body development ; GO:0016319 | determination of adult lifespan ; GO:0008340 | intestinal stem c…	DNA-binding transcription factor activity ; GO:0003700 | protein homodimerization activity ; GO:0042803
				FBgn0028519			-	-
				FBgn0261268	Cullin 3	Cul3	protein K48-linked ubiquitination ; GO:0070936 | negative regulation of smoothened signaling pathway ; GO:0045879 | sensory organ development ; GO:0007423 | protein ubiquitination ; GO:0016567 | axonogenesis ; GO:0007409 | activation of cysteine-type endopeptidase activity involved in apoptotic process ; GO:0006919 | pole cell fate determination ; GO:0007278 | protein polyubiquitination ; GO:0000…	ubiquitin protein ligase binding ; GO:0031625 | molecular adaptor activity ; GO:0060090 | protein binding ; GO:0005515
				FBgn0025678	calcium-binding protein 1	CaBP1	cell redox homeostasis ; GO:0045454 | ipositive regulation of apoptotic cell clearance ; GO:2000427	isomerase activity ; GO:0016853 | peptide disulfide oxidoreductase activity ; GO:0015037
				FBgn0032699	-	CG10383	determination of adult lifespan ; GO:0008340	hydrolase activity, acting on ester bonds ; GO:0016788
				FBgn0032785	-	CG10026	-	phosphatidylinositol bisphosphate binding ; GO:1902936
				FBgn0032940	Mondo	Mondo	regulation of transcription, DNA-templated ; GO:0006355 | regulation of transcription by RNA polymerase II ; GO:0006357 | glucose homeostasis ; GO:0042593 | response to sucrose ; GO:0009744 | triglyceride homeostasis ; GO:0070328	DNA-binding transcription factor activity ; GO:0003700 | protein heterodimerization activity ; GO:0046982 | transcription factor binding ; GO:0008134 | DNA binding ; GO:0003677
				FBgn0033134	Tetraspanin 42El	Tsp42El	-	-
				FBgn0033188	Death resistor Adh domain containing target	Drat	cellular response to ethanol ; GO:0071361 | response to hypoxia ; GO:0001666 | alcohol metabolic process ; GO:0006066	oxidoreductase activity, acting on the CH-OH group of donors, NAD or NADP as acceptor ; GO:0016616 | alcohol dehydrogenase (NADP+) activity ; GO:0008106
				FBgn0033395	Cyp4p2	Cyp4p2	oxidation-reduction process ; GO:0055114	oxidoreductase activity, acting on paired donors, with incorporation or reduction of molecular oxygen ; GO:0016705 | heme binding ; GO:0020037 |iron ion binding ; GO:0005506
				FBgn0260012	precocious dissociation of sisters 5	pds5	mitotic cohesin unloading ; GO:0061781 | DNA repair ; GO:0006281 | mitotic sister chromatid cohesion ; GO:0007064 | oocyte karyosome formation ; GO:0030717 | chromosome segregation ; GO:0007059 | sister chromatid cohesion ; GO:0007062	-
				FBgn0025454	Cyp6g1	Cyp6g1	oxidation-reduction process ; GO:0055114 | response to DDT ; GO:0046680 | response to insecticide ; GO:0017085 | insecticide catabolic process ; GO:0046701 | response to organophosphorus ; GO:0046683 | response to mercury ion ; GO:0046689	oxidoreductase activity, acting on paired donors, with incorporation or reduction of molecular oxygen ; GO:0016705 | heme binding ; GO:0020037 | iron ion binding ; GO:0005506
				FBgn0033911	Vesicular GABA Transporter	VGAT	amino acid transmembrane transport ; GO:0003333 | gamma-aminobutyric acid transport ; GO:0015812 | sleep ; GO:0030431 | visual behavior ; GO:0007632 | synaptic transmission, GABAergic ; GO:0051932 | amino acid transmembrane transport ; GO:0003333 | neurotransmitter loading into synaptic vesicle ; GO:0098700	amino acid transmembrane transporter activity ; GO:0015171 | gamma-aminobutyric acid transmembrane transporter activity ; GO:0015185 | gamma-aminobutyric acid:proton symporter activity ; GO:0015495
				FBgn0033949	beta Hydroxy acid dehydrogenase 2	Had2	oxidation-reduction process ; GO:0055114 | fatty acid metabolic process ; GO:0006631	3-hydroxyacyl-CoA dehydrogenase activity ; GO:0003857 | NAD+ binding ; GO:0070403
				FBgn0012042	Attacin-A	AttA	defense response to Gram-negative bacterium ; GO:0050829 | defense response to Gram-negative bacterium ; GO:0050829 | humoral immune response ; GO:0006959 | response to hyperoxia ; GO:0055093 | defense response to Gram-positive bacterium ; GO:0050830 | antibacterial humoral response ; GO:0019731	-
				FBgn0034084	-	CG8435	-	-
				FBgn0034136	Dopamine transporter	DAT	circadian sleep/wake cycle ; GO:0042745 | sleep ; GO:0030431 | regulation of presynaptic cytosolic calcium ion concentration ; GO:0099509 | dopamine transport ; GO:0015872 | dopamine uptake involved in synaptic transmission ; GO:0051583 | response to odorant ; GO:1990834 | circadian sleep/wake cycle ; GO:0042745 | norepinephrine transport ; GO:0015874 | adult locomotory behavior ; GO:0008344	neurotransmitter:sodium symporter activity ; GO:0005328 | dopamine:sodium symporter activity ; GO:0005330 | cocaine binding ; GO:0019811
				FBgn0034501	-	CG13868	-	-
				FBgn0034709	Secreted Wg-interacting molecule	Swim	immune response ; GO:0006955 | positive regulation of canonical Wnt signaling pathway ; GO:0090263 | positive regulation of Wnt signaling pathway by establishment of Wnt protein localization to extracellular region ; GO:0035593 | proteolysis ; GO:0006508	polysaccharide binding ; GO:0030247 | scavenger receptor activity ; GO:0005044 | cysteine-type peptidase activity ; GO:0008234 | Wnt-protein binding ; GO:0017147
				FBgn0260866	defense repressor 1	dnr1	negative regulation of biosynthetic process of antibacterial peptides active against Gram-negative bacteria ; GO:0002814 | ubiquitin-dependent protein catabolic process ; GO:0006511 | sleep ; GO:0030431 | protein ubiquitination ; GO:0016567	ubiquitin-protein transferase activity ; GO:0004842 | ubiquitin protein ligase activity ; GO:0061630 | zinc ion binding ; GO:0008270
				FBgn0034854	Golgin-245	Golgin245	Golgi vesicle transport ; GO:0048193	ADP-ribosylation factor binding ; GO:0030306 | Rab GTPase binding ; GO:0017137
				FBgn0019643	Arylalkylamine N-acetyltransferase 1	AANAT1	octopamine catabolic process ; GO:0046334 | sleep ; GO:0030431 | serotonin catabolic process ; GO:0042429 | catecholamine metabolic process ; GO:0006584 | regulation of circadian sleep/wake cycle, sleep ; GO:0045187 | dopamine catabolic process ; GO:0042420 | developmental pigmentation ; GO:0048066	aralkylamine N-acetyltransferase activity ; GO:0004059 | N-acetyltransferase activity ; GO:0008080 | arylamine N-acetyltransferase activity ; GO:0004060
				FBgn0265193	Activating transcription factor-2	Atf-2	cellular response to osmotic stress ; GO:0071470 | positive regulation of transcription by RNA polymerase II ; GO:0045944 | cellular response to heat ; GO:0034605 | regulation of triglyceride biosynthetic process ; GO:0010866 | stress-activated MAPK cascade ; GO:0051403 | positive regulation of heterochromatin assembly ; GO:0031453 | heterochromatin maintenance ; GO:0070829 | mucosal immune respo…	sequence-specific DNA binding ; GO:0043565 | DNA-binding transcription activator activity, RNA polymerase II-specific ; GO:0001228 | protein homodimerization activity ; GO:0042803
				FBgn0085434	Na channel protein 60E	NaCP60E	membrane depolarization during action potential ; GO:0086010 | neuronal action potential ; GO:0019228 | sodium ion transport ; GO:0006814 | olfactory behavior ; GO:0042048 | sodium ion transmembrane transport ; GO:0035725	cation channel activity ; GO:0005261 | voltage-gated sodium channel activity ; GO:0005248 | voltage-gated cation channel activity ; GO:0022843
				FBgn0004055	unzipped	uzip	axonal fasciculation ; GO:0007413 | axon guidance ; GO:0007411	-
				FBgn0035187	Tryptophan hydroxylase	Trh	aromatic amino acid family metabolic process ; GO:0009072 | oxidation-reduction process ; GO:0055114 | regulation of circadian sleep/wake cycle, sleep ; GO:0045187 | sleep ; GO:0030431 | serotonin biosynthetic process ; GO:0042427 | tracheal pit formation in open tracheal system ; GO:0035202	iron ion binding ; GO:0005506 | phenylalanine 4-monooxygenase activity ; GO:0004505 | tryptophan 5-monooxygenase activity ; GO:0004510
				FBgn0011204	cueball	cue	positive regulation of circadian sleep/wake cycle, sleep ; GO:0045938 | triglyceride homeostasis ; GO:0070328	calcium ion binding ; GO:0005509 | Notch binding ; GO:0005112
				FBgn0052423	alan shepard	shep	adult locomotory behavior ; GO:0008344 | metamorphosis ; GO:0007552 | response to gravity ; GO:0009629 | gravitaxis ; GO:0042332 | neuron remodeling ; GO:0016322 | female courtship behavior ; GO:0008050 | response to endoplasmic reticulum stress ; GO:0034976	RNA binding ; GO:0003723 | mRNA binding ; GO:0003729
				FBgn0086694	Bre1	Bre1	histone monoubiquitination ; GO:0010390 | histone modification ; GO:0016570 | histone ubiquitination ; GO:0016574 | protein monoubiquitination ; GO:0006513	metal ion binding ; GO:0046872 | zinc ion binding ; GO:0008270 | ubiquitin-protein transferase activity ; GO:0004842
				FBgn0004244	Resistant to dieldrin	Rdl	nervous system process ; GO:0050877 | inter-male aggressive behavior ; GO:0002121 | ion transmembrane transport ; GO:0034220 | signal transduction ; GO:0007165 | response to mechanical stimulus ; GO:0009612 | sleep ; GO:0030431 | negative regulation of synaptic transmission ; GO:0050805 | regulation of membrane potential ; GO:0042391 | regulation of olfactory learning ; GO:0090328 | response to d…	GABA-A receptor activity ; GO:0004890 | neurotransmitter receptor activity ; GO:0030594 | GABA-gated chloride ion channel activity ; GO:0022851
				FBgn0035985	Cuticular protein 67B	Cpr67B	chitin-based cuticle development ; GO:0040003	structural constituent of cuticle ; GO:0042302 | structural constituent of chitin-based larval cuticle ; GO:0008010
				FBgn0023129	astray	aay	L-serine biosynthetic process ; GO:0006564 | dephosphorylation ; GO:0016311 | L-serine metabolic process ; GO:0006563 | behavioral response to ethanol ; GO:0048149	calcium ion binding ; GO:0005509 | phosphoserine phosphatase activity ; GO:0004647 | phosphatase activity ; GO:0016791 | magnesium ion binding ; GO:0000287
				FBgn0036022	-	CG8329	proteolysis ; GO:0006508	serine-type endopeptidase activity ; GO:0004252
				FBgn0036046	Insulin-like peptide 2	Ilp2	insulin receptor signaling pathway ; GO:0008286 | negative regulation of feeding behavior ; GO:2000252 | positive regulation of cell population proliferation ; GO:0008284 | glucose homeostasis ; GO:0042593 | locomotor rhythm ; GO:0045475 | positive regulation of organ growth ; GO:0046622 | regulation of cell size ; GO:0008361 | negative regulation of entry into reproductive diapause ; GO:0061964 …	hormone activity ; GO:0005179 | receptor ligand activity ; GO:0048018 | insulin receptor binding ; GO:0005158 | protein binding ; GO:0005515
				FBgn0044050	Insulin-like peptide 3	Ilp3	insulin receptor signaling pathway ; GO:0008286 | sleep ; GO:0030431 | female mating behavior ; GO:0060180 | circadian rhythm ; GO:0007623 | response to carbohydrate ; GO:0009743 | locomotor rhythm ; GO:0045475 | negative regulation of entry into reproductive diapause ; GO:0061964	hormone activity ; GO:0005179 | insulin receptor binding ; GO:0005158
				FBgn0036449	brummer	bmm	positive regulation of lipid storage ; GO:0010884 | lipid homeostasis ; GO:0055088 | lipid catabolic process ; GO:0016042 | negative regulation of sequestering of triglyceride ; GO:0010891 | triglyceride homeostasis ; GO:0070328 | triglyceride catabolic process ; GO:0019433 | triglyceride mobilization ; GO:0006642 | triglyceride catabolic process ; GO:0019433	triglyceride lipase activity ; GO:0004806
				FBgn0002778	minidiscs	mnd	amino acid transport ; GO:0006865 | L-leucine import across plasma membrane ; GO:1903801	amino acid transmembrane transporter activity ; GO:0015171 | L-amino acid transmembrane transporter activity ; GO:0015179
				FBgn0036512	-	CG16979	proteolysis ; GO:0006508	thiolester hydrolase activity ; GO:0016790 | UFM1 hydrolase activity ; GO:0071567
				FBgn0036680	Cuticular protein 73D	Cpr73D	chitin-based cuticle development ; GO:0040003	structural constituent of cuticle ; GO:0042302 | structural constituent of chitin-based larval cuticle ; GO:0008010
				FBgn0262517	Listerin E3 ubiquitin protein ligase 1	Ltn1	proteasome-mediated ubiquitin-dependent protein catabolic process ; GO:0043161 | ribosome-associated ubiquitin-dependent protein catabolic process ; GO:1990116 | rescue of stalled ribosome ; GO:0072344	ubiquitin protein ligase activity ; GO:0061630 | zinc ion binding ; GO:0008270 | ribosomal large subunit binding ; GO:0043023
				FBgn0262518	Rab8	Rab8	cellular response to insulin stimulus ; GO:0032869 | protein localization to plasma membrane ; GO:0072659 | polarized secretion of basement membrane proteins in epithelium ; GO:0061865 | protein secretion ; GO:0009306 | intracellular protein transport ; GO:0006886 | Rab protein signal transduction ; GO:0032482 | regulation of synaptic growth at neuromuscular junction ; GO:0008582 | protein locali…	GTP binding ; GO:0005525 | GTPase activity ; GO:0003924
				FBgn0037090	Esterase Q	Est-Q	-	-
				FBgn0262737	mushroom-body expressed	mub	regulation of alternative mRNA splicing, via spliceosome ; GO:0000381	RNA binding ; GO:0003723
				FBgn0266347	nicotinic Acetylcholine Receptor alpha4	nAChRalpha4	sleep ; GO:0030431 | signal transduction ; GO:0007165 | nervous system process ; GO:0050877 | regulation of membrane potential ; GO:0042391 | ion transmembrane transport ; GO:0034220 | chemical synaptic transmission ; GO:0007268	acetylcholine-gated cation-selective channel activity ; GO:0022848 | acetylcholine receptor activity ; GO:0015464
				FBgn0024289	Sorbitol dehydrogenase 1	Sodh-1	oxidation-reduction process ; GO:0055114	zinc ion binding ; GO:0008270 | L-iditol 2-dehydrogenase activity ; GO:0003939
				FBgn0026563	-	CG1979	-	-
				FBgn0005585	Calreticulin	Calr	sleep ; GO:0030431 | endoplasmic reticulum unfolded protein response ; GO:0030968 | olfactory behavior ; GO:0042048 | protein folding ; GO:0006457	unfolded protein binding ; GO:0051082 | calcium ion binding ; GO:0005509
				FBgn0038250	-	CG3505	proteolysis ; GO:0006508	serine-type endopeptidase activity ; GO:0004252
				FBgn0038299	Serpin 88Eb	Spn88Eb	regulation of stem cell division ; GO:2000035 | epithelium regeneration ; GO:1990399 | response to fungus ; GO:0009620 | negative regulation of endopeptidase activity ; GO:0010951 | negative regulation of proteolysis ; GO:0045861	serine-type endopeptidase inhibitor activity ; GO:0004867
				FBgn0027657	globin 1	glob1	oxygen transport ; GO:0015671	heme binding ; GO:0020037 | oxygen binding ; GO:0019825 | peroxidase activity ; GO:0004601 | heme binding ; GO:002003
				FBgn0014141	cheerio	cher	female germline ring canal formation, actin assembly ; GO:0008302 | motor neuron axon guidance ; GO:0008045 | germline ring canal formation ; GO:0030725 | germarium-derived female germ-line cyst encapsulation ; GO:0030708 | cytoplasmic transport, nurse cell to oocyte ; GO:0007303 | sarcomere organization ; GO:0045214 | determination of adult lifespan ; GO:0008340 | mitotic cell cycle ; GO:0000278…	actin binding ; GO:0003779
				FBgn0261262	-	CG42613	-	-
				FBgn0000463	Delta	Dl	apposition of dorsal and ventral imaginal disc-derived wing surfaces ; GO:0007475 | sensory organ development ; GO:0007423 | second mitotic wave involved in compound eye morphogenesis ; GO:0016330 | oogenesis ; GO:0048477 | mesoderm development ; GO:0007498 | antennal morphogenesis ; GO:0048800 | stem cell differentiation ; GO:0048863 | imaginal disc-derived wing margin morphogenesis ; GO:0008587…	calcium ion binding ; GO:0005509 | Notch binding ; GO:0005112 | receptor ligand activity ; GO:0048018 | protein binding ; GO:0005515 | glycosphingolipid binding ; GO:0043208
				FBgn0038733	-	CG11407	fatty acid biosynthetic process ; GO:0006633	catalytic activity ; GO:0003824 | fatty acid ligase activity ; GO:0015645 | CoA-ligase activity ; GO:0016405
				FBgn0083975	Neuroligin 4	Nlg4	chemical synaptic transmission ; GO:0007268 | synaptic vesicle endocytosis ; GO:0048488 | sleep ; GO:0030431 | synaptic transmission, GABAergic ; GO:0051932 | neuron cell-cell adhesion ; GO:0007158 | modulation of chemical synaptic transmission ; GO:0050804 | postsynaptic membrane assembly ; GO:0097104 | presynaptic membrane assembly ; GO:0097105	signaling receptor activity ; GO:0038023 | neurexin family protein binding ; GO:0042043
				FBgn0038839	Kctd12-like	Ktl	protein homooligomerization ; GO:0051260 | sleep ; GO:0030431 | male courtship behavior ; GO:0008049 | negative regulation of locomotion involved in locomotory behavior ; GO:0090327 | inter-male aggressive behavior ; GO:0002121	-
				FBgn0003257	rudimentary-like	r-l	de novo' UMP biosynthetic process ; GO:0044205 | 'de novo' pyrimidine nucleobase biosynthetic process ; GO:0006207 | nucleoside metabolic process ; GO:0009116 | pyrimidine nucleobase biosynthetic process ; GO:0019856 |UMP biosynthetic process ; GO:0006222NTHER:PTN000444530	orotidine-5'-phosphate decarboxylase activity ; GO:0004590 | orotate phosphoribosyltransferase activity ; GO:0004588
				FBgn0039135	-	CG13603	-	-
				FBgn0039209	Repressed by TOR	REPTOR	response to unfolded protein ; GO:0006986 | response to starvation ; GO:0042594 | TORC1 signaling ; GO:0038202 | positive regulation of transcription, DNA-templated ; GO:0045893	DNA-binding transcription factor activity ; GO:0003700 | protein heterodimerization activity ; GO:0046982 PTOR-BP
				FBgn0039464	-	CG6330	nucleoside metabolic process ; GO:0009116 | nucleotide catabolic process ; GO:0009166 | gravitaxis ; GO:0042332	uridine phosphorylase activity ; GO:00048509
				FBgn0039465	Tetraspanin 97E	Tsp97E	-	-
				FBgn0039580	Glutamine:fructose-6-phosphate aminotransferase 2	Gfat2	fructose 6-phosphate metabolic process ; GO:0006002 | UDP-N-acetylglucosamine metabolic process ; GO:0006047 | protein N-linked glycosylation ; GO:0006487	carbohydrate derivative binding ; GO:0097367 | glutamine-fructose-6-phosphate transaminase (isomerizing) activity ; GO:0004360
				FBgn0010015	Calcineurin A1	CanA1	calcineurin-mediated signaling ; GO:0097720 | negative regulation of epidermal growth factor receptor signaling pathway ; GO:0042059 | response to nitric oxide ; GO:0071731 | medium-term memory ; GO:0072375 | protein dephosphorylation ; GO:0006470 | sleep ; GO:0030431 | vesicle-mediated transport ; GO:0016192 | neurotransmitter secretion ; GO:0007269 | regulation of innate immune response ; GO:00…	calmodulin-dependent protein phosphatase activity ; GO:0033192 | protein serine/threonine phosphatase activity ; GO:0004722 | calmodulin binding ; GO:0005516 | calcium-dependent protein serine/threonine phosphatase activity ; GO:0004723
				FBgn0002413	discs overgrown	dco	behavioral response to cocaine ; GO:0048148 | establishment of ommatidial planar polarity ; GO:0042067 | negative regulation of apoptotic process ; GO:0043066 | regulation of ecdysteroid secretion ; GO:0007555 | Wnt signaling pathway ; GO:0016055 | cellular response to light stimulus ; GO:0071482 | positive regulation of cell division ; GO:0051781 | locomotor rhythm ; GO:0045475 | protein phospho…	ATP binding ; GO:0005524 | protein binding ; GO:0005515 | protein serine/threonine kinase activity ; GO:0004674
				FBgn0027348	bubblegum	bgm	response to endoplasmic reticulum stress ; GO:0034976 | positive regulation of circadian sleep/wake cycle, sleep ; GO:0045938 | long-chain fatty acid metabolic process ; GO:0001676 | neuron cellular homeostasis ; GO:0070050 | fatty acid biosynthetic process ; GO:0006633 | fatty acid metabolic process ; GO:0006631	long-chain fatty acid-CoA ligase activity ; GO:0004467 | protein binding ; GO:0005515 | fatty acid ligase activity ; GO:0015645
				FBgn0016977	split ends	spen	transcription, DNA-templated ; GO:0006351 | segment specification ; GO:0007379 | establishment of thoracic bristle planar orientation ; GO:0048106 | imaginal disc-derived wing vein morphogenesis ; GO:0008586 | defense response to fungus ; GO:0050832 | wing disc pattern formation ; GO:0035222 | positive regulation of canonical Wnt signaling pathway ; GO:0090263 | axon guidance ; GO:0007411 | epide…	nucleic acid binding ; GO:0003676
				FBgn0010014	Calcineurin B	CanB	vesicle-mediated transport ; GO:0016192 | sleep ; GO:0030431 | neurotransmitter secretion ; GO:0007269 | nprotein dephosphorylation ; GO:0006470	calcium ion binding ; GO:0005509 | calcium-dependent protein serine/threonine phosphatase regulator activity ; GO:0008597 | calmodulin binding ; GO:0005516
				FBgn0015295	SH2 ankyrin repeat kinase	Shark	maintenance of epithelial cell apical/basal polarity ; GO:0045199 | eggshell chorion assembly ; GO:0007306 | JNK cascade ; GO:0007254 | apoptotic cell clearance ; GO:0043277 | dorsal appendage formation ; GO:0046843 | dorsal closure ; GO:0007391 | dorsal closure, elongation of leading edge cells ; GO:0007394	ATP binding ; GO:0005524 | protein tyrosine kinase activity ; GO:0004713
				FBgn0017581	Lk6 kinase	Lk6	positive regulation of peptidyl-serine phosphorylation ; GO:0033138 | microtubule-based process ; GO:0007017 | protein autophosphorylation ; GO:0046777 | peptidyl-serine phosphorylation ; GO:0018105 | protein phosphorylation ; GO:0006468 | signal transduction ; GO:0035556 | regulation of growth ; GO:0040008	ATP binding ; GO:0005524 | protein serine/threonine kinase activity ; GO:0004674 | calcium-dependent protein serine/threonine kinase activity ; GO:0009931 | protein kinase activity ; GO:0004672 | kinase activity ; GO:0016301 | mitogen-activated protein kinase binding ; GO:0051019 | calmodulin binding ; GO:0005516
				FBgn0028990	Serpin 27A	Spn27A	dorsal/ventral pattern formation ; GO:0009953 | negative regulation of proteolysis ; GO:0045861 | negative regulation of melanization defense response ; GO:0035009 | negative regulation of Toll signaling pathway ; GO:0045751 | melanization defense response ; GO:0035006 | melanotic encapsulation of foreign target ; GO:0035011 | negative regulation of endopeptidase activity ; GO:0010951 | behaviora…	serine-type endopeptidase inhibitor activity ; GO:0004867
				FBgn0010786	lethal (3) 02640	l(3)02640	peptidyl-pyrromethane cofactor linkage ; GO:0018160 | heme biosynthetic process ; GO:0006783	hydroxymethylbilane synthase activity ; GO:0004418
				FBgn0015222	Ferritin 1 heavy chain homologue	Fer1HCH	intracellular sequestering of iron ion ; GO:0006880 | detoxification of iron ion ; GO:1990461 | response to fungus ; GO:0009620 | cellular iron ion homeostasis ; GO:0006879 | iron ion import across plasma membrane ; GO:0098711	iron ion binding ; GO:0005506 | ferrous iron binding ; GO:0008198 | ferric iron binding ; GO:0008199 | ferroxidase activity ; GO:0004322
				FBgn0015614	Calcineurin B2	CanB2	sleep ; GO:0030431 | protein dephosphorylation ; GO:0006470 | skeletal muscle myosin thick filament assembly ; GO:0030241 | neurotransmitter secretion ; GO:0007269 | vesicle-mediated transport ; GO:0016192 | meiotic cell cycle ; GO:0051321 | sarcomere organization ; GO:0045214	calcium ion binding ; GO:0005509 | calmodulin binding ; GO:0005516 | protein binding ; GO:0005515 | calcium-dependent protein serine/threonine phosphatase regulator activity ; GO:0008597
				FBgn0002719	Malic enzyme	Men	malate metabolic process ; GO:0006108 | pyruvate metabolic process ; GO:0006090 | oxidation-reduction process ; GO:0055114 | sleep ; GO:0030431 | regulation of cell death ; GO:0010941 | determination of adult lifespan ; GO:0008340	NAD binding ; GO:0051287 | malate dehydrogenase (decarboxylating) (NAD+) activity ; GO:0004471 | malate dehydrogenase (decarboxylating) (NADP+) activity ; GO:0004473 | malic enzyme activity ; GO:0004470
				FBgn0086370	sarah	sra	sleep ; GO:0030431 | egg activation ; GO:0007343 | long-term memory ; GO:0007616 | regulation of female receptivity ; GO:0045924 | regulation of calcineurin-NFAT signaling cascade ; GO:0070884 | female meiotic nuclear division ; GO:0007143 | regulation of female receptivity, post-mating ; GO:0046008 | male pronucleus assembly ; GO:0035039 | meiotic cell cycle ; GO:0051321 | olfactory learning ; G…	nucleic acid binding ; GO:0003676 | protein binding ; GO:0005515 | calcium-dependent protein serine/threonine phosphatase regulator activity ; GO:0008597
				FBgn0000079	Amylase proximal	Amy-p	carbohydrate metabolic process ; GO:0005975	cation binding ; GO:0043169 | catalytic activity ; GO:0003824 | alpha-amylase activity ; GO:0004556 | calcium ion binding ; GO:0005509
				FBgn0000477	Deoxyribonuclease II	DNaseII	apoptotic DNA fragmentation ; GO:0006309 | nurse cell apoptotic process ; GO:0045476 | NA catabolic process ; GO:0006308	deoxyribonuclease II activity ; GO:0004531 | endodeoxyribonuclease activity ; GO:0004520
				FBgn0002174	-	CG5504	protein folding ; GO:0006457 | response to heat ; GO:0009408 | mitochondrion organization ; GO:0007005 | negative regulation of smoothened signaling pathway ; GO:0045879 | regulation of apoptotic process ; GO:0042981	ATP binding ; GO:0005524 | unfolded protein binding ; GO:0051082 | heat shock protein binding ; GO:0031072 | patched binding ; GO:0005113
				FBgn0001977	Cytokine induced apoptosis inhibitor 1	CIAPIN1	negative regulation of apoptotic process ; GO:0043066 | ovarian follicle cell development ; GO:0030707 | iron-sulfur cluster assembly ; GO:0016226	iron-sulfur cluster binding ; GO:0051536
				FBgn0040732	-	CG16926	-	-
				FBgn0040071	taranis	tara	sleep ; GO:0030431 | wing disc dorsal/ventral pattern formation ; GO:0048190 | chromatin-mediated maintenance of transcription ; GO:0048096 | locomotor rhythm ; GO:0045475	-
				FBgn0052281	-	CG32281	tRNA N1-guanine methylation ; GO:0002939 | tRNA methylation ; GO:0030488 | mitochondrial tRNA methylation ; GO:0070901	tRNA methyltransferase activity ; GO:0008175 | tRNA (guanine-N1-)-methyltransferase activity ; GO:0009019
				FBgn0260499	quiver	qvr	positive regulation of voltage-gated potassium channel activity ; GO:1903818 | sleep ; GO:0030431 | positive regulation of circadian sleep/wake cycle, sleep ; GO:0045938 | negative regulation of acetylcholine-gated cation channel activity ; GO:1903049 | regulation of circadian sleep/wake cycle, sleep ; GO:0045187 | regulation of synaptic transmission, cholinergic ; GO:0032222 | negative regulatio…	GPI anchor binding ; GO:0034235
				FBgn0041723	rhomboid-5	rho-5	regulation of epidermal growth factor receptor signaling pathway ; GO:0042058 | regulation of protein secretion ; GO:0050708 | negative regulation of epidermal growth factor receptor signaling pathway ; GO:0042059 | positive regulation of circadian sleep/wake cycle, wakefulness ; GO:0010841	serine-type endopeptidase activity ; GO:0004252
				FBgn0044048	Insulin-like peptide 5	Ilp5	insulin receptor signaling pathway ; GO:0008286 | negative regulation of entry into reproductive diapause ; GO:0061964 | sleep ; GO:0030431 | carbohydrate homeostasis ; GO:0033500 | locomotory behavior ; GO:0007626 | female mating behavior ; GO:0060180 | circadian rhythm ; GO:0007623	hormone activity ; GO:0005179 | protein binding ; GO:0005515 | receptor ligand activity ; GO:0048018 | insulin receptor binding ; GO:0005158
		GO:0006730	one-carbon metabolic process | one carbon metabolic process | one carbon metabolism | one-carbon metabolism | one-carbon transfer metabolic process | one-carbon transfer metabolism. he chemical reactions and pathways involving the transfer of one-carbon units in various oxidation states.	FBgn0014455	Adenosylhomocysteinase	Ahcy	S-adenosylhomocysteine catabolic process ; GO:0019510 | S-adenosylmethionine cycle ; GO:0033353	adenosylhomocysteinase activity ; GO:0004013
				FBgn0027844	Carbonic anhydrase 1	CAH1	one-carbon metabolic process ; GO:0006730	zinc ion binding ; GO:0008270 | carbonate dehydratase activity ; GO:0004089
				FBgn0032945	-	CG8665	oxidation-reduction process ; GO:0055114 | 10-formyltetrahydrofolate catabolic process ; GO:0009258 | one-carbon metabolic process ; GO:0006730 | biosynthetic process ; GO:0009058	hydroxymethyl-, formyl- and related transferase activity ; GO:0016742 | formyltetrahydrofolate dehydrogenase activity ; GO:0016155 | aldehyde dehydrogenase (NAD+) activity ; GO:0004029
				FBgn0035371	Adenosylhomocysteinase like 1	AhcyL1	S-adenosylmethionine cycle ; GO:0033353 | S-adenosylhomocysteine catabolic process ; GO:0019510	adenosylhomocysteinase activity ; GO:0004013
				FBgn0036157	-	CG7560	oxidation-reduction process ; GO:0055114 | methionine biosynthetic process ; GO:0009086 | tetrahydrofolate interconversion ; GO:0035999 | one-carbon metabolic process ; GO:0006730	methylenetetrahydrofolate reductase (NAD(P)H) activity ; GO:0004489 | FAD binding ; GO:0071949
				FBgn0027843	Carbonic anhydrase 2	CAH2	one-carbon metabolic process ; GO:0006730	zinc ion binding ; GO:0008270 | carbonate dehydratase activity ; GO:0004089
				FBgn0037646	Carbonic anhydrase beta	CAHbeta	one-carbon metabolic process ; GO:0006730	zinc ion binding ; GO:0008270 | carbonate dehydratase activity ; GO:0004089
				FBgn0037788	Carbonic anhydrase 7	CAH7	-	carbonate dehydratase activity ; GO:0004089 | zinc ion binding ; GO:0008270
				FBgn0015011	Adenosylhomocysteinase like 2	AhcyL2	S-adenosylmethionine cycle ; GO:0033353	adenosylhomocysteinase activity ; GO:0004013
				FBgn0038956	Carbonic anhydrase 8	CAH8	-	carbonate dehydratase activity ; GO:0004089 | zinc ion binding ; GO:0008270
				FBgn0039235	Carbonic anhydrase 4	CAH4	-	carbonate dehydratase activity ; GO:0004089 | zinc ion binding ; GO:0008270
				FBgn0039486	Carbonic anhydrase 9	CAH9	-	carbonate dehydratase activity ; GO:0004089 | zinc ion binding ; GO:0008270
				FBgn0010222	NAD-dependent methylenetetrahydrofolate dehydrogenase	Nmdmc	oxidation-reduction process ; GO:0055114 | tetrahydrofolate interconversion ; GO:0035999 | carbohydrate metabolic process ; GO:0005975 | tetrahydrofolate metabolic process ; GO:0046653 | one-carbon metabolic process ; GO:0006730 | 10-formyltetrahydrofolate metabolic process ; GO:0009256	methenyltetrahydrofolate cyclohydrolase activity ; GO:0004477 | methylenetetrahydrofolate dehydrogenase (NAD+) activity ; GO:0004487 | methylenetetrahydrofolate dehydrogenase (NADP+) activity ; GO:0004488 | magnesium ion binding ; GO:0000287 | phosphate ion binding ; GO:0042301
				FBgn0040628	Carbonic anhydrase 16	CAH16	-	carbonate dehydratase activity ; GO:0004089 | zinc ion binding ; GO:0008270
				FBgn0040629	Carbonic anhydrase 5	CAH5	-	carbonate dehydratase activity ; GO:0004089 | zinc ion binding ; GO:0008270
		GO:0008084	imaginal disc growth factor receptor binding | imaginal disc growth factor. Interacting selectively and non-covalently with an imaginal disc growth factor receptor.	FBgn0026415	Imaginal disc growth factor 4	Idgf4	carbohydrate metabolic process ; GO:0005975 | imaginal disc development ; GO:0007444 | wound healing ; GO:0042060 | ecdysis, chitin-based cuticle ; GO:0018990 | chitin catabolic process ; GO:0006032 | chitin-based cuticle development ; GO:0040003	chitinase activity ; GO:0004568 | imaginal disc growth factor receptor binding ; GO:0008084 | chitin binding ; GO:0008061
				FBgn0020416	Imaginal disc growth factor 1	Idgf1	carbohydrate metabolic process ; GO:0005975 | regulation of stem cell division ; GO:2000035 | chitin-based cuticle development ; GO:0040003 | chitin catabolic process ; GO:0006032 | imaginal disc development ; GO:0007444 | wound healing ; GO:0042060 | ecdysis, chitin-based cuticle ; GO:0018990 | epithelium regeneration ; GO:1990399	chitinase activity ; GO:0004568 | chitin binding ; GO:0008061 | imaginal disc growth factor receptor binding ; GO:0008084
				FBgn0020415	Imaginal disc growth factor 2	Idgf2	carbohydrate metabolic process ; GO:0005975 | positive regulation of cell population proliferation ; GO:0008284 | negative regulation of apoptotic process ; GO:0043066 | chitin catabolic process ; GO:0006032 | imaginal disc development ; GO:0007444	chitin binding ; GO:0008061 | imaginal disc growth factor receptor binding ; GO:0008084 | chitinase activity ; GO:0004568
				FBgn0020414	Imaginal disc growth factor 3	Idgf3	carbohydrate metabolic process ; GO:0005975 | imaginal disc development ; GO:0007444 | chitin-based cuticle development ; GO:0040003 | ecdysis, chitin-based cuticle ; GO:0018990 | chitin catabolic process ; GO:0006032 | wound healing ; GO:0042060	imaginal disc growth factor receptor binding ; GO:0008084 | chitinase activity ; GO:0004568 | chitin binding ; GO:0008061
				FBgn0013763	Imaginal disc growth factor 6	Idgf6	carbohydrate metabolic process ; GO:0005975 | imaginal disc development ; GO:0007444 | ecdysis, chitin-based cuticle ; GO:0018990 | chitin-based cuticle development ; GO:0040003 | wound healing ; GO:0042060 | chitin catabolic process ; GO:0006032 | cuticle chitin catabolic process ; GO:0006036	chitinase activity ; GO:0004568 | chitin binding ; GO:0008061 | imaginal disc growth factor receptor binding ; GO:0008084
				FBgn0064237	Imaginal disc growth factor 5	Idgf5	carbohydrate metabolic process ; GO:0005975 | chitin-based cuticle development ; GO:0040003 | chitin catabolic process ; GO:0006032 | wound healing ; GO:0042060 | imaginal disc development ; GO:0007444	imaginal disc growth factor receptor binding ; GO:0008084 | chitinase activity ; GO:0004568 | chitin binding ; GO:0008061
Starvation Resistance	Females	GO:0032870	cellular response to hormone stimulus. Any process that results in a change in state or activity of a cell (in terms of movement, secretion, enzyme production, gene expression, etc.) as a result of a hormone stimulus.	FBgn0025625	Salt-inducible kinase 2	Sik2	protein phosphorylation ; GO:0006468 | cellular response to insulin stimulus ; GO:0032869 | insulin receptor signaling pathway ; GO:0008286 | intracellular signal transduction ; GO:0035556 | response to starvation ; GO:0042594 | protein phosphorylation ; GO:0006468	ATP binding ; GO:0005524 | protein serine/threonine kinase activity ; GO:0004674
				FBgn0085410	Trissin receptor	TrissinR	G protein-coupled receptor signaling pathway ; GO:0007186 | cellular response to hormone stimulus ; GO:0032870 | G protein-coupled receptor signaling pathway ; GO:0007186	neuropeptide receptor activity ; GO:0008188 | G protein-coupled peptide receptor activity ; GO:0008528 | peptide binding ; GO:0042277 | G protein-coupled receptor activity ; GO:0004930
				FBgn0041092	taiman	tai	positive regulation of transcription by RNA polymerase II ; GO:0045944 | border follicle cell migration ; GO:0007298 | cellular response to hormone stimulus ; GO:0032870 | positive regulation of growth ; GO:0045927 | germ-line stem-cell niche homeostasis ; GO:0060250 | axon extension ; GO:0048675 | positive regulation of border follicle cell migration ; GO:1903688 | regulation of transcription, D…	protein dimerization activity ; GO:0046983 | steroid hormone receptor binding ; GO:0035258 | nuclear receptor transcription coactivator activity ; GO:0030374 | nuclear receptor binding ; GO:0016922 | nuclear hormone receptor binding ; GO:0035257
				FBgn0001291	Jun-related antigen	Jra	positive regulation of transcription by RNA polymerase II ; GO:0045944 | MAPK cascade ; GO:0000165 | multicellular organism aging ; GO:0010259 | regulation of cell population proliferation ; GO:0042127 | chorion micropyle formation ; GO:0046844 | dorsal closure ; GO:0007391 | positive regulation of transcription by RNA polymerase II ; GO:0045944 | negative regulation of transcription by RNA polym…	protein binding ; GO:0005515 | RNA polymerase II proximal promoter sequence-specific DNA binding ; GO:0000978 | DNA-binding transcription factor activity, RNA polymerase II-specific ; GO:0000981 | transcription factor binding ; GO:0008134 | transcription coactivator activity ; GO:0003713 | protein heterodimerization activity ; GO:0046982
				FBgn0025595	Adipokinetic hormone receptor	AkhR	carbohydrate homeostasis ; GO:0033500 | G protein-coupled receptor signaling pathway ; GO:0007186 | lipid homeostasis ; GO:0055088 | G protein-coupled receptor signaling pathway ; GO:0007186 | glucose homeostasis ; GO:0042593 | cellular response to starvation ; GO:0009267 | lipid catabolic process ; GO:0016042 | G protein-coupled receptor signaling pathway ; GO:0007186 | triglyceride homeostasis …	peptide binding ; GO:0042277 | adipokinetic hormone receptor activity ; GO:0097003 | adipokinetic hormone binding ; GO:0097004 | neuropeptide receptor activity ; GO:0008188 | adipokinetic hormone receptor activity ; GO:0097003 |G protein-coupled receptor activity ; GO:0004930 | G protein-coupled receptor activity ; GO:0004930
				FBgn0262103	Salt-inducible kinase 3	Sik3	negative regulation of triglyceride catabolic process ; GO:0010897 | lipid homeostasis ; GO:0055088 | insulin receptor signaling pathway ; GO:0008286 | positive regulation of pentose-phosphate shunt ; GO:1905857 | circadian sleep/wake cycle, sleep ; GO:0050802 | intracellular signal transduction ; GO:0035556 | protein phosphorylation ; GO:0006468 | peptidyl-threonine phosphorylation ; GO:0018107 …	ATP binding ; GO:0005524 | protein serine/threonine kinase activity ; GO:0004674
		GO:0033500	carbohydrate homeostasis. A homeostatic process involved in the maintenance of an internal steady state of a carbohydrate within an organism or cell.	FBgn0010303	hemipterous	hep	chorion micropyle formation ; GO:0046844 | establishment of planar polarity ; GO:0001736 | dorsal closure ; GO:0007391 | positive regulation of gene expression ; GO:0010628 | ovarian follicle cell development ; GO:0030707 | melanization defense response ; GO:0035006 | imaginal disc fusion, thorax closure ; GO:0046529 | response to heat ; GO:0009408 | positive regulation of actin filament bundle a…	ATP binding ; GO:0005524 | MAP-kinase scaffold activity ; GO:0005078 | JUN kinase kinase activity ; GO:0008545 | protein binding ; GO:0005515 | protein kinase binding ; GO:0019901 | MAP kinase kinase activity ; GO:0004708 | protein kinase activity ; GO:0004672
				FBgn0053126	Neural Lazarillo	NLaz	multicellular organism reproduction ; GO:0032504 | carbohydrate homeostasis ; GO:0033500 | determination of adult lifespan ; GO:0008340 | response to reactive oxygen species ; GO:0000302 | triglyceride homeostasis ; GO:0070328 | response to oxidative stress ; GO:0006979 | lipid metabolic process ; GO:0006629	pigment binding ; GO:0031409
				FBgn0004552	Adipokinetic hormone	Akh	glucose homeostasis ; GO:0042593 | lipid homeostasis ; GO:0055088 | response to starvation ; GO:0042594 | carbohydrate homeostasis ; GO:0033500 | neuropeptide signaling pathway ; GO:0007218 | response to carbohydrate ; GO:0009743 | positive regulation of triglyceride catabolic process ; GO:0010898 | positive regulation of insulin secretion ; GO:0032024	adipokinetic hormone receptor binding ; GO:0097005 | neuropeptide hormone activity ; GO:0005184
				FBgn0025595	Adipokinetic hormone receptor	AkhR	carbohydrate homeostasis ; GO:0033500 | G protein-coupled receptor signaling pathway ; GO:0007186 | lipid homeostasis ; GO:0055088 | G protein-coupled receptor signaling pathway ; GO:0007186 | glucose homeostasis ; GO:0042593 | cellular response to starvation ; GO:0009267 | lipid catabolic process ; GO:0016042 | G protein-coupled receptor signaling pathway ; GO:0007186 | triglyceride homeostasis …	peptide binding ; GO:0042277 | adipokinetic hormone receptor activity ; GO:0097003 | adipokinetic hormone binding ; GO:0097004 | neuropeptide receptor activity ; GO:0008188 | adipokinetic hormone receptor activity ; GO:0097003 |G protein-coupled receptor activity ; GO:0004930 | G protein-coupled receptor activity ; GO:0004930
				FBgn0023179	amontillado	amon	instar larval or pupal development ; GO:0002165 | hatching behavior ; GO:0035187 | proteolysis ; GO:0006508 | larval wandering behavior ; GO:0035180 | R8 cell fate specification ; GO:0045464 | carbohydrate homeostasis ; GO:0033500 | peptide hormone processing ; GO:0016486 | protein processing ; GO:0016485	serine-type endopeptidase activity ; GO:0004252 | peptidase activity ; GO:0008233
		GO:0008586	imaginal disc-derived wing vein morphogenesis | wing vein morphogenesis. The process in which anatomical structures of the veins on an imaginal disc-derived wing are generated and organized.	FBgn0003079	Raf oncogene	Raf	terminal region determination ; GO:0007362 | epidermal growth factor receptor signaling pathway ; GO:0007173 | terminal branching, open tracheal system ; GO:0007430 | regulation of cellular pH ; GO:0030641 | R7 cell fate commitment ; GO:0007465 | positive regulation of ERK1 and ERK2 cascade ; GO:0070374 | positive regulation of cell population proliferation ; GO:0008284 | regulation of multicellu…	ATP binding ; GO:0005524 | protein serine/threonine kinase activity ; GO:0004674 | MAP kinase kinase kinase activity ; GO:0004709 | protein binding ; GO:0005515 | kinase binding ; GO:0019900
				FBgn0003463	short gastrulation	sog	negative regulation of BMP signaling pathway ; GO:0030514 | positive regulation of BMP signaling pathway ; GO:0030513 | maternal specification of dorsal/ventral axis, oocyte, soma encoded ; GO:0007313 | ring gland development ; GO:0035271 | imaginal disc-derived wing vein morphogenesis ; GO:0008586 | posterior Malpighian tubule development ; GO:0061328 | amnioserosa formation ; GO:0007378 | seque…	BMP binding ; GO:0036122 | collagen binding ; GO:0005518
				FBgn0260938	tay bridge	tay	imaginal disc-derived wing vein morphogenesis ; GO:0008586 | negative regulation of epidermal growth factor receptor signaling pathway ; GO:0042059 | adult walking behavior ; GO:0007628 | pattern orientation ; GO:0007633	-
				FBgn0031005	Heparan sulfate 3-O sulfotransferase-B	Hs3st-B	chaeta morphogenesis ; GO:0008407 | imaginal disc-derived wing vein specification ; GO:0007474 | imaginal disc-derived wing vein morphogenesis ; GO:0008586 | imaginal disc-derived leg joint morphogenesis ; GO:0016348 | wing disc dorsal/ventral pattern formation ; GO:0048190 | negative regulation of neurogenesis ; GO:0050768 | lysosome organization ; GO:0007040 | imaginal disc-derived wing morphog…	[heparan sulfate]-glucosamine 3-sulfotransferase 1 activity ; GO:0008467
				FBgn0015905	asteroid	ast	imaginal disc-derived wing vein morphogenesis ; GO:0008586 | compound eye morphogenesis ; GO:0001745 | compound eye photoreceptor fate commitment ; GO:0001752 | imaginal disc-derived wing morphogenesis ; GO:0007476 | larval somatic muscle development ; GO:0007526	-
				FBgn0003557	Suppressor of deltex	Su(dx)	negative regulation of Notch signaling pathway ; GO:0045746 | regulation of protein localization ; GO:0032880 | receptor internalization ; GO:0031623 | imaginal disc-derived wing margin morphogenesis ; GO:0008587 | protein ubiquitination ; GO:0016567 | ubiquitin-dependent protein catabolic process ; GO:0006511 | imaginal disc-derived wing vein morphogenesis ; GO:0008586 | lipid storage ; GO:00199…	ubiquitin-protein transferase activity ; GO:0004842 | WW domain binding ; GO:0050699 | Notch binding ; GO:0005112 | ubiquitin protein ligase activity ; GO:0061630
				FBgn0000490	decapentaplegic	dpp	SMAD protein signal transduction ; GO:0060395 | Malpighian tubule morphogenesis ; GO:0007443 | BMP signaling pathway ; GO:0030509 | germ-line stem cell population maintenance ; GO:0030718 | cell chemotaxis involved in Malpighian tubule morphogenesis ; GO:0061352 | dorsal closure ; GO:0007391 | imaginal disc growth ; GO:0007446 | progression of morphogenetic furrow involved in compound eye morphog…	growth factor activity ; GO:0008083 | heparin binding ; GO:0008201 | morphogen activity ; GO:0016015 | collagen binding ; GO:0005518 | BMP receptor binding ; GO:0070700 | receptor ligand activity ; GO:0048018 | cytokine activity ; GO:0005125 | protein heterodimerization activity ; GO:0046982 | protein homodimerization activity ; GO:0042803 | protein binding ; GO:0005515
				FBgn0011648	Mothers against dpp	Mad	positive regulation of transcription by RNA polymerase II ; GO:0045944 | BMP signaling pathway ; GO:0030509 | imaginal disc-derived wing morphogenesis ; GO:0007476 | negative regulation of salivary gland boundary specification ; GO:0045705 | negative regulation of transcription by RNA polymerase II ; GO:0000122 | positive regulation of synaptic growth at neuromuscular junction ; GO:0045887 | imag…	sequence-specific DNA binding ; GO:0043565 | DNA-binding transcription activator activity, RNA polymerase II-specific ; GO:0001228 | RNA polymerase II proximal promoter sequence-specific DNA binding ; GO:0000978 | DNA-binding transcription repressor activity, RNA polymerase II-specific ; GO:0001227 | protein binding ; GO:0005515 | RNA polymerase II regulatory region sequence-specific DNA binding …
				FBgn0262029	dachs	d	establishment of ommatidial planar polarity ; GO:0042067 | negative regulation of hippo signaling ; GO:0035331 | protein localization involved in establishment of planar polarity ; GO:0090251 | wing disc development ; GO:0035220 | establishment of planar polarity ; GO:0001736 | positive regulation of growth ; GO:0045927 | leg disc development ; GO:0035218 | imaginal disc-derived wing vein morphog…	motor activity ; GO:0003774 | ATPase activity ; GO:0016887 | actin filament binding ; GO:0051015 | microfilament motor activity ; GO:0000146 | protein binding ; GO:0005515 | molecular adaptor activity ; GO:0060090 | ATP binding ; GO:0005524
				FBgn0261983	lethal (2) giant discs 1	l(2)gd1	negative regulation of Notch signaling pathway ; GO:0045746 | negative regulation of transcription by RNA polymerase II ; GO:0000122 | sensory organ precursor cell division ; GO:0045035 | imaginal disc-derived wing vein morphogenesis ; GO:0008586 | endosomal transport ; GO:0016197 | wing disc morphogenesis ; GO:0007472 | female germ-line stem cell asymmetric division ; GO:0048132 | intracellular …	DNA-binding transcription repressor activity, RNA polymerase II-specific ; GO:0001227 | phospholipid binding ; GO:0005543 |DNA-binding transcription factor activity, RNA polymerase II-specific ; GO:0000981
				FBgn0000287	spalt-related	salr	antennal joint development ; GO:0048098 | imaginal disc-derived wing vein morphogenesis ; GO:0008586 | male genitalia development ; GO:0030539 | sensory perception of sound ; GO:0007605 | sensory organ development ; GO:0007423 | regulation of transcription, DNA-templated ; GO:0006355 | negative regulation of transcription by RNA polymerase II ; GO:0000122 | male gonad development ; GO:0008584	RNA polymerase II regulatory region sequence-specific DNA binding ; GO:0000977 | DNA-binding transcription factor activity ; GO:0003700
				FBgn0261648	spalt major	salm	negative regulation of terminal cell fate specification, open tracheal system ; GO:0035155 | open tracheal system development ; GO:0007424 | regulation of cell fate specification ; GO:0042659 | muscle organ morphogenesis ; GO:0048644 | glial cell development ; GO:0021782 | compound eye photoreceptor cell differentiation ; GO:0001751 | somatic muscle development ; GO:0007525 | male gonad developme…	nucleic acid binding ; GO:0003676 | DNA-binding transcription factor activity ; GO:0003700
				FBgn0004837	Suppressor of Hairless	Su(H)	Notch signaling pathway ; GO:0007219 | positive regulation of transcription by RNA polymerase II ; GO:0045944 | negative regulation of transcription, DNA-templated ; GO:0045892 | dorsal/ventral lineage restriction, imaginal disc ; GO:0007451 | positive regulation of G1/S transition of mitotic cell cycle ; GO:1900087 | wing disc dorsal/ventral pattern formation ; GO:0048190 | crystal cell differen…	DNA binding ; GO:0003677 | RNA polymerase II proximal promoter sequence-specific DNA binding ; GO:0000978 | DNA-binding transcription factor activity, RNA polymerase II-specific ; GO:0000981 | sequence-specific DNA binding ; GO:0043565 | RNA polymerase II regulatory region sequence-specific DNA binding ; GO:0000977 | protein binding ; GO:0005515 | RNA polymerase II-specific DNA-binding transcript…
				FBgn0000317	crinkled	ck	antennal development ; GO:0007469 | antennal morphogenesis ; GO:0048800 | chitin-based larval cuticle pattern formation ; GO:0035293 | actin filament-based movement ; GO:0030048 | actin filament organization ; GO:0007015 | imaginal disc-derived wing hair organization ; GO:0035317 | chaeta morphogenesis ; GO:0008407 | imaginal disc-derived wing hair organization ; GO:0035317 | sensory organ develo…	actin filament binding ; GO:0051015 | ATP binding ; GO:0005524 | myosin light chain binding ; GO:0032027 | actin-dependent ATPase activity ; GO:0030898 | cadherin binding ; GO:0045296 |motor activity ; GO:0003774
				FBgn0041184	Suppressor of cytokine signaling at 36E	Socs36E	negative regulation of receptor signaling pathway via JAK-STAT ; GO:0046426 | intracellular signal transduction ; GO:0035556 | negative regulation of R7 cell differentiation ; GO:0045677 | haltere development ; GO:0007482 | positive regulation of lysosomal protein catabolic process ; GO:1905167 | border follicle cell migration ; GO:0007298 | notum morphogenesis ; GO:0048802 | negative regulation …	1-phosphatidylinositol-3-kinase regulator activity ; GO:0046935 | sevenless binding ; GO:0005118 | cytokine receptor binding ; GO:0005126
				FBgn0086779	steppke	step	positive regulation of ARF protein signal transduction ; GO:0032014 | regulation of actin cytoskeleton organization ; GO:0032956 | positive regulation of ERK1 and ERK2 cascade ; GO:0070374 | positive regulation of insulin receptor signaling pathway ; GO:0046628 | imaginal disc-derived wing vein specification ; GO:0007474 | regulation of actomyosin structure organization ; GO:0110020 | dorsal clos…	ARF guanyl-nucleotide exchange factor activity ; GO:0005086 | phosphatidylinositol-3,4,5-trisphosphate binding ; GO:0005547 | protein homodimerization activity ; GO:0042803
				FBgn0042085	Brahma associated protein 170kD	Bap170	imaginal disc-derived wing margin morphogenesis ; GO:0008587 | positive regulation of transcription, DNA-templated ; GO:0045893 | imaginal disc-derived leg morphogenesis ; GO:0007480 | protein stabilization ; GO:0050821 | imaginal disc-derived wing vein morphogenesis ; GO:0008586 | negative regulation of chromatin silencing ; GO:0031936	DNA binding ; GO:0003677 | protein binding ; GO:0005515
				FBgn0003396	schnurri	shn	negative regulation of transcription by RNA polymerase II ; GO:0000122 | negative regulation of transcription by RNA polymerase II ; GO:0000122 | BMP signaling pathway ; GO:0030509 | positive regulation of transcription by RNA polymerase II ; GO:0045944 | imaginal disc-derived wing vein morphogenesis ; GO:0008586 | dorsal closure ; GO:0007391 | midgut development ; GO:0007494 | wing disc dorsal/v…	zinc ion binding ; GO:0008270 | nucleic acid binding ; GO:0003676 | transcription coactivator activity ; GO:0003713 | transcription corepressor activity ; GO:0003714 | RNA polymerase II activating transcription factor binding ; GO:0001102 | DNA-binding transcription factor activity, RNA polymerase II-specific ; GO:0000981
				FBgn0021818
				FBgn0003731	Epidermal growth factor receptor	Egfr	cell-cell adhesion ; GO:0098609 | notum development ; GO:0007477 | epithelial cell proliferation involved in Malpighian tubule morphogenesis ; GO:0061331 | eye-antennal disc morphogenesis ; GO:0007455 | negative regulation of G1/S transition of mitotic cell cycle ; GO:2000134 | morphogenesis of follicular epithelium ; GO:0016333 | ommatidial rotation ; GO:0016318 | imaginal disc-derived wing morp…	protein domain specific binding ; GO:0019904 | ATP binding ; GO:0005524 | epidermal growth factor-activated receptor activity ; GO:0005006 | protein binding ; GO:0005515 | transmembrane receptor protein tyrosine kinase activity ; GO:0004714
				FBgn0003175	plexus	px	imaginal disc-derived wing vein morphogenesis ; GO:0008586	-
				FBgn0263667	Lost PHDs of trr	Lpt	ecdysis, chitin-based cuticle ; GO:0018990 | inferred from mutant phenotype <newline> imaginal disc-derived wing vein morphogenesis ; GO:0008586 | inferred from mutant phenotype inferred from genetic interaction with dpp <newline> positive regulation of histone H3-K9 trimethylation ; GO:1900114 | inferred from mutant phenotype <newline> imaginal disc-derived wing vein specification ; GO:0007474 |…	histone binding ; GO:0042393 | inferred from biological aspect of ancestor with PANTHER:PTN002505160 <newline> nuclear receptor transcription coactivator activity ; GO:0030374 | inferred from direct assay <newline> transcription coactivator activity ; GO:0003713 | inferred from biological aspect of ancestor with PANTHER:PTN002505160 <newline> zinc ion binding ; GO:0008270 | inferred from sequence…
				FBgn0004101	blistered	bs	short-term memory ; GO:0007614 | inferred from mutant phenotype <newline> pupal development ; GO:0035209 | inferred from mutant phenotype <newline> imaginal disc-derived wing vein morphogenesis ; GO:0008586 | inferred from mutant phenotype <newline> instar larval development ; GO:0002168 | inferred from mutant phenotype <newline> cell differentiation ; GO:0030154 | inferred from mutant phenotype …	protein dimerization activity ; GO:0046983 | inferred from electronic annotation with InterPro:IPR002100 <newline> proximal promoter sequence-specific DNA binding ; GO:0000987 | inferred from electronic annotation with InterPro:IPR033897 <newline> activating transcription factor binding ; GO:0033613 | inferred from physical interaction with Mrtf <newline> DNA-binding transcription activator activ…
				FBgn0035142	Homeodomain interacting protein kinase	Hipk	imaginal disc-derived wing vein morphogenesis ; GO:0008586 | positive regulation of canonical Wnt signaling pathway ; GO:0090263 | protein stabilization ; GO:0050821 | protein phosphorylation ; GO:0006468 | positive regulation of gene expression ; GO:0010628 | peptidyl-serine phosphorylation ; GO:0018105 | compound eye development ; GO:0048749 | positive regulation of smoothened signaling pathway…	ATP binding ; GO:0005524 | protein serine/threonine kinase activity ; GO:0004674 | beta-catenin binding ; GO:0008013 | transcription factor binding ; GO:0008134 | protein tyrosine kinase activity ; GO:0004713
				FBgn0000575	extra macrochaetae	emc	compound eye cone cell differentiation ; GO:0042675 | head involution ; GO:0008258 | photoreceptor cell fate commitment ; GO:0046552 | sex determination ; GO:0007530 | R7 cell differentiation ; GO:0045466 | progression of morphogenetic furrow involved in compound eye morphogenesis ; GO:0007458 | imaginal disc-derived wing morphogenesis ; GO:0007476 | circadian regulation of gene expression ; GO:0…	transcription corepressor activity ; GO:0003714 | protein heterodimerization activity ; GO:0046982
				FBgn0004635	rhomboid	rho	epidermal growth factor receptor ligand maturation ; GO:0038004 | photoreceptor cell fate determination ; GO:0043703 | peptide bond cleavage involved in epidermal growth factor receptor ligand maturation ; GO:0038005 | compound eye photoreceptor fate commitment ; GO:0001752 | positive regulation of phosphorylation ; GO:0042327 | imaginal disc-derived wing morphogenesis ; GO:0007476 | cell-cell ad…	serine-type endopeptidase activity ; GO:0004252
				FBgn0003984	vein	vn	positive regulation of cell population proliferation ; GO:0008284 | epidermal growth factor receptor signaling pathway ; GO:0007173 | epidermal growth factor receptor signaling pathway ; GO:0007173 | haltere development ; GO:0007482 | notum cell fate specification ; GO:0035310 | intracellular signal transduction ; GO:0035556 | open tracheal system development ; GO:0007424 | olfactory learning ; G…	epidermal growth factor receptor binding ; GO:0005154 | heparin binding ; GO:0008201 | receptor ligand activity ; GO:0048018 | signaling receptor binding ; GO:0005102
				FBgn0011817	nemo	nmo	protein autophosphorylation ; GO:0046777 | gravitaxis ; GO:0042332 | wing disc dorsal/ventral pattern formation ; GO:0048190 | ommatidial rotation ; GO:0016318 | imaginal disc-derived wing vein specification ; GO:0007474 | compound eye development ; GO:0048749 | regulation of gene expression ; GO:0010468 | imaginal disc-derived wing morphogenesis ; GO:0007476 | intracellular signal transduction ;…	ATP binding ; GO:0005524 | MAP kinase activity ; GO:0004707 | protein serine/threonine kinase activity ; GO:0004674 | protein kinase activity ; GO:0004672
				FBgn0263930	division abnormally delayed	dally	imaginal disc-derived wing vein morphogenesis ; GO:0008586 | positive regulation of canonical Wnt signaling pathway ; GO:0090263 | positive regulation of smoothened signaling pathway ; GO:0045880 | chaeta development ; GO:0022416 | epithelial cell migration, open tracheal system ; GO:0007427 | dendrite morphogenesis ; GO:0048813 | maintenance of protein location in extracellular region ; GO:00716…	protein binding ; GO:0005515
				FBgn0000212	brahma	brm	positive regulation of stem cell proliferation ; GO:2000648 | ATP-dependent chromatin remodeling ; GO:0043044 | hemocyte proliferation ; GO:0035172 | positive regulation of transcription, DNA-templated ; GO:0045893 | negative regulation of neuroblast proliferation ; GO:0007406 | regulation of transcription by RNA polymerase II ; GO:0006357 | cell dedifferentiation ; GO:0043697 | imaginal disc-der…	ATP binding ; GO:0005524 | histone binding ; GO:0042393 | transcription factor binding ; GO:0008134 | DNA-dependent ATPase activity ; GO:0008094 | protein binding ; GO:0005515 | transcription coactivator binding ; GO:0001223 | ATPase activity ; GO:0016887 | DNA binding ; GO:0003677
				FBgn0259174	Nedd4	Nedd4	protein ubiquitination ; GO:0016567 | positive regulation of protein catabolic process ; GO:0045732 | positive regulation of endocytosis ; GO:0045807 | regulation of dendrite morphogenesis ; GO:0048814 | negative regulation of Notch signaling pathway ; GO:0045746 | imaginal disc-derived wing vein morphogenesis ; GO:0008586 | ubiquitin-dependent protein catabolic process ; GO:0006511 | positive re…	Notch binding ; GO:0005112 | ubiquitin protein ligase activity ; GO:0061630 | protein binding ; GO:0005515 | protein domain specific binding ; GO:0019904 | ubiquitin-protein transferase activity ; GO:0004842 | myosin binding ; GO:0017022
				FBgn0011715	Snf5-related 1	Snr1	nucleosome disassembly ; GO:0006337 | imaginal disc-derived wing vein morphogenesis ; GO:0008586 | neuronal stem cell population maintenance ; GO:0097150 | negative regulation of cell population proliferation ; GO:0008285 | cell dedifferentiation ; GO:0043697 | positive regulation of transcription, DNA-templated ; GO:0045893 | negative regulation of neuroblast proliferation ; GO:0007406 | regulat…	SET domain binding ; GO:0070984 | transcription coactivator activity ; GO:0003713 | Tat protein binding ; GO:0030957 | <newline> protein binding ; GO:0005515
				FBgn0037657	hyrax	hyx	histone modification ; GO:0016570 | recruitment of 3'-end processing factors to RNA polymerase II holoenzyme complex ; GO:0034402 | positive regulation of smoothened signaling pathway ; GO:0045880 | imaginal disc-derived wing vein morphogenesis ; GO:0008586 | chaeta morphogenesis ; GO:0008407 | positive regulation of transcription by RNA polymerase II ; GO:0045944 | positive regulation of transcr…	RNA polymerase II complex binding ; GO:0000993 | transcription factor binding ; GO:0008134
				FBgn0003205	Ras oncogene at 85D	Ras85D	cell fate determination ; GO:0001709 | vascular endothelial growth factor receptor signaling pathway ; GO:0048010 |myoblast fate specification ; GO:0048626 | lymph gland plasmatocyte differentiation ; GO:0035169 | imaginal disc-derived wing vein specification ; GO:0007474 | positive regulation of cell population proliferation ; GO:0008284 | sevenless signaling pathway ; GO:0045500 | imaginal disc…	GTPase activity ; GO:0003924 | protein binding ; GO:0005515 | GTP binding ; GO:0005525 | GDP binding ; GO:0019003 | protein serine/threonine kinase activator activity ; GO:0043539
				FBgn0002783	moira	mor	imaginal disc-derived wing margin morphogenesis ; GO:0008587 | positive regulation of transcription, DNA-templated ; GO:0045893 | imaginal disc-derived wing vein specification ; GO:0007474 | ATP-dependent chromatin remodeling ; GO:0043044 | negative regulation of neuroblast proliferation ; GO:0007406 | regulation of transcription by RNA polymerase II ; GO:0006357 | imaginal disc-derived wing vein…	DNA binding ; GO:0003677 | protein binding ; GO:0005515 | histone binding ; GO:0042393
				FBgn0261885	osa	osa	regulation of transcription by RNA polymerase II ; GO:0006357 | imaginal disc-derived wing morphogenesis ; GO:0007476 | Wnt signaling pathway ; GO:0016055 | positive regulation of transcription, DNA-templated ; GO:0045893 | photoreceptor cell differentiation ; GO:0046530 | regulation of transcription, DNA-templated ; GO:0006355 | ATP-dependent chromatin remodeling ; GO:0043044 | segment specifica…	DNA binding ; GO:0003677
				FBgn0000463	Delta	Dl	apposition of dorsal and ventral imaginal disc-derived wing surfaces ; GO:0007475 | sensory organ development ; GO:0007423 | second mitotic wave involved in compound eye morphogenesis ; GO:0016330 | oogenesis ; GO:0048477 | mesoderm development ; GO:0007498 | antennal morphogenesis ; GO:0048800 | stem cell differentiation ; GO:0048863 | imaginal disc-derived wing margin morphogenesis ; GO:0008587…	calcium ion binding ; GO:0005509 | Notch binding ; GO:0005112 | receptor ligand activity ; GO:0048018 | protein binding ; GO:0005515 | glycosphingolipid binding ; GO:0043208
				FBgn0260003	Dystrophin	Dys	regulation of short-term neuronal synaptic plasticity ; GO:0048172 | imaginal disc-derived wing vein morphogenesis ; GO:0008586 | muscle cell cellular homeostasis ; GO:0046716 | regulation of neurotransmitter secretion ; GO:0046928 | imaginal disc-derived wing vein specification ; GO:0007474 | establishment of cell polarity ; GO:0030010 | neuromuscular synaptic transmission ; GO:0007274 | muscle …	zinc ion binding ; GO:0008270 | WW domain binding ; GO:0050699 | structural constituent of muscle ; GO:0008307 | actin binding ; GO:0003779 | protein binding ; GO:0005515
				FBgn0001169	Hairless	H	sensory organ precursor cell fate determination ; GO:0016360 | somatic stem cell population maintenance ; GO:0035019 | wing disc dorsal/ventral pattern formation ; GO:0048190 | negative regulation of transcription by RNA polymerase II ; GO:0000122 | negative regulation of Notch signaling pathway ; GO:0045746 | intestinal stem cell homeostasis ; GO:0036335 | sensory organ boundary specification ; …	protein binding ; GO:0005515 | transcription corepressor activity ; GO:0003714
				FBgn0004885	tolkin	tok	protein processing ; GO:0016485 | axon guidance ; GO:0007411 | positive regulation of BMP signaling pathway ; GO:0030513 | imaginal disc-derived wing vein morphogenesis ; GO:0008586 | motor neuron axon guidance ; GO:0008045 | defasciculation of motor neuron axon ; GO:0007415 | positive regulation of activin receptor signaling pathway ; GO:0032927	zinc ion binding ; GO:0008270 | calcium ion binding ; GO:0005509 | metalloendopeptidase activity ; GO:0004222
				FBgn0003719	tolloid	tld	positive regulation of BMP signaling pathway ; GO:0030513 | amnioserosa formation ; GO:0007378 | positive regulation of BMP signaling pathway ; GO:0030513 | protein processing ; GO:0016485 | proteolysis ; GO:0006508 | R8 cell fate specification ; GO:0045464 | maternal specification of dorsal/ventral axis, oocyte, soma encoded ; GO:0007313 | imaginal disc-derived wing vein morphogenesis ; GO:00085…	zinc ion binding ; GO:0008270 | calcium ion binding ; GO:0005509 | metalloendopeptidase activity ; GO:0004222 | collagen binding ; GO:0005518
				FBgn0016977	split ends	spen	transcription, DNA-templated ; GO:0006351 | segment specification ; GO:0007379 | establishment of thoracic bristle planar orientation ; GO:0048106 | imaginal disc-derived wing vein morphogenesis ; GO:0008586 | defense response to fungus ; GO:0050832 | wing disc pattern formation ; GO:0035222 | positive regulation of canonical Wnt signaling pathway ; GO:0090263 | axon guidance ; GO:0007411 | epide…	nucleic acid binding ; GO:0003676
				FBgn0026252	moleskin	msk	protein import into nucleus ; GO:0006606 | imaginal disc-derived wing vein morphogenesis ; GO:0008586 | ommatidial rotation ; GO:0016318 | muscle attachment ; GO:0016203 | compound eye cone cell differentiation ; GO:0042675 | negative regulation of neuron apoptotic process ; GO:0043524 | imaginal disc-derived wing morphogenesis ; GO:0007476 | rhabdomere development ; GO:0042052 | R8 cell differen…	Ran GTPase binding ; GO:0008536 | U4 snRNA binding ; GO:0030621 | protein binding ; GO:0005515 | U1 snRNA binding ; GO:0030619 | U2 snRNA binding ; GO:0030620
				FBgn0002931	net	net	cell differentiation ; GO:0030154 | imaginal disc-derived wing vein specification ; GO:0007474 | negative regulation of transcription by RNA polymerase II ; GO:0000122 | imaginal disc-derived wing vein morphogenesis ; GO:0008586 | regulation of transcription, DNA-templated ; GO:0006355	protein dimerization activity ; GO:0046983 | DNA-binding transcription factor activity ; GO:0003700
				FBgn0010825	Grunge	Gug	segmentation ; GO:0035282 | segment specification ; GO:0007379 | imaginal disc-derived leg morphogenesis ; GO:0007480 | imaginal disc-derived wing vein morphogenesis ; GO:0008586 | larval somatic muscle development ; GO:0007526 | inter-male aggressive behavior ; GO:0002121 | embryonic pattern specification ; GO:0009880 | regulation of histone acetylation ; GO:0035065 | negative regulation of smoo…	transcription corepressor activity ; GO:0003714 | DNA binding ; GO:0003677 | histone deacetylase activity ; GO:0004407 | repressing transcription factor binding ; GO:0070491 | RNA polymerase II transcription factor binding ; GO:0001085
				FBgn0011224	hephaestus	heph	mRNA processing ; GO:0006397 | spermatid development ; GO:0007286 | imaginal disc-derived wing vein morphogenesis ; GO:0008586 | imaginal disc-derived wing margin morphogenesis ; GO:0008587 | negative regulation of oskar mRNA translation ; GO:0007319 | sperm individualization ; GO:0007291 | regulation of translation ; GO:0006417 | regulation of RNA splicing ; GO:0043484 | oocyte microtubule cytos…	mRNA binding ; GO:0003729 | translation repressor activity, mRNA regulatory element binding ; GO:0000900 | mRNA 3'-UTR binding ; GO:0003730
	Males	GO:0007485	imaginal disc-derived male genitalia development | male genital development. The process whose specific outcome is the progression of the male genitalia over time, from formation as part of the genital disc to the mature structure. An example of this is found in Drosophila melanogaster.	FBgn0003502	Btk family kinase at 29A	Btk29A	intracellular signal transduction ; GO:0035556 | actin cytoskeleton organization ; GO:0030036 | DNA endoreduplication ; GO:0042023 | female germline ring canal formation ; GO:0007301 | courtship behavior ; GO:0007619 | head involution ; GO:0008258 | regulation of actin filament polymerization ; GO:0030833 | determination of adult lifespan ; GO:0008340 | cellularization ; GO:0007349 | imaginal dis…	ATP binding ; GO:0005524 | protein tyrosine kinase activity ; GO:0004713 | non-membrane spanning protein tyrosine kinase activity ; GO:0004715
				FBgn0000577	engrailed	en	anterior head segmentation ; GO:0035288 | segment polarity determination ; GO:0007367 | compartment pattern specification ; GO:0007386 | gonad development ; GO:0008406 | genital disc anterior/posterior pattern formation ; GO:0035224 | ventral midline development ; GO:0007418 | wing disc anterior/posterior pattern formation ; GO:0048100 | compartment pattern specification ; GO:0007386 | trunk segm…	RNA polymerase II proximal promoter sequence-specific DNA binding ; GO:0000978 | DNA-binding transcription repressor activity, RNA polymerase II-specific ; GO:0001227 | sequence-specific DNA binding ; GO:0043565 | RNA polymerase II regulatory region sequence-specific DNA binding ; GO:0000977
				FBgn0000157	Distal-less	Dll	imaginal disc-derived appendage morphogenesis ; GO:0035114 | analia development ; GO:0007487 | antennal development ; GO:0007469 | imaginal disc-derived male genitalia development ; GO:0007485 | leg disc proximal/distal pattern formation ; GO:0007479 | regulation of transcription by RNA polymerase II ; GO:0006357 | olfactory nerve development ; GO:0021553 | determination of ventral identity ; GO:…	sequence-specific DNA binding ; GO:0043565 | RNA polymerase II proximal promoter sequence-specific DNA binding ; GO:0000978 | DNA-binding transcription factor activity ; GO:0003700
				FBgn0000504	doublesex	dsx	sex-specific pigmentation ; GO:0048071 | sex comb development ; GO:0045498 | male sex differentiation ; GO:0046661 | regulation of transcription by RNA polymerase II ; GO:0006357 | axon midline choice point recognition ; GO:0016199 | female analia development ; GO:0045497 | sex determination ; GO:0007530 | courtship behavior ; GO:0007619 | male courtship behavior, veined wing generated song produ…	RNA polymerase II regulatory region sequence-specific DNA binding ; GO:0000977 | protein binding ; GO:0005515 | DNA-binding transcription activator activity, RNA polymerase II-specific ; GO:0001228 | zinc ion binding ; GO:0008270 | protein homodimerization activity ; GO:0042803 | DNA-binding transcription repressor activity, RNA polymerase II-specific ; GO:0001227
				FBgn0265778	PDZ domain-containing guanine nucleotide exchange factor	PDZ-GEF	small GTPase mediated signal transduction ; GO:0007264 | oogenesis ; GO:0048477 | germ-line stem cell population maintenance ; GO:0030718 | MAPK cascade ; GO:0000165 | positive regulation of sevenless signaling pathway ; GO:0045874 | adherens junction assembly ; GO:0034333 | hemocyte migration ; GO:0035099 | substrate-dependent cell migration, cell extension ; GO:0006930 | compound eye developmen…	Rap guanyl-nucleotide exchange factor activity ; GO:0017034 | Ras GTPase binding ; GO:0017016
				FBgn0000492	Drop	Dr	regulation of transcription, DNA-templated ; GO:0006355 | ventral cord development ; GO:0007419 | ectoderm development ; GO:0007398 | glial cell development ; GO:0021782 | central nervous system development ; GO:0007417 | regulation of cell fate specification ; GO:0042659 | brain development ; GO:0007420 | wing and notum subfield formation ; GO:0035309 | imaginal disc-derived male genitalia devel…	DNA-binding transcription factor activity, RNA polymerase II-specific ; GO:0000981 | RNA polymerase II regulatory region sequence-specific DNA binding ; GO:0000977 | sequence-specific DNA binding ; GO:0043565
		GO:0016327	apicolateral plasma membrane | apical lateral plasma membrane. The apical end of the lateral plasma membrane of epithelial cells.	FBgn0024361	Tetraspanin 2A	Tsp2A	establishment of endothelial intestinal barrier ; GO:0090557 | establishment of endothelial barrier ; GO:0061028 | glial cell migration ; GO:0008347 | smooth septate junction assembly ; GO:0090528	protein binding ; GO:0005515
				FBgn0000117	armadillo	arm	segment polarity determination ; GO:0007367 | zonula adherens assembly ; GO:0045186 | positive regulation of transcription by RNA polymerase II ; GO:0045944 | nervous system development ; GO:0007399 | epithelial cell type specification, open tracheal system ; GO:0035153 | long-term memory ; GO:0007616 | wing disc morphogenesis ; GO:0007472 | branch fusion, open tracheal system ; GO:0035147 | cano…	protein phosphatase binding ; GO:0019903 | protein binding ; GO:0005515 | transcription coactivator activity ; GO:0003713 | nuclear hormone receptor binding ; GO:0035257 | cadherin binding ; GO:0045296 | kinase binding ; GO:0019900 | transcription factor binding ; GO:0008134 | alpha-catenin binding ; GO:0045294
				FBgn0027108	Innexin 2	Inx2	male germ-line stem cell population maintenance ; GO:0036098 | germarium-derived female germ-line cyst formation ; GO:0030727 | germarium-derived egg chamber formation ; GO:0007293 | morphogenesis of embryonic epithelium ; GO:0016331 | phototransduction ; GO:0007602 | intercellular transport ; GO:0010496 | foregut morphogenesis ; GO:0007440 | spermatogenesis ; GO:0007283 | cell communication ; GO…	gap junction channel activity ; GO:0005243
				FBgn0001624	discs large 1	dlg1	establishment or maintenance of polarity of follicular epithelium ; GO:0016334 | positive regulation of synaptic growth at neuromuscular junction ; GO:0045887 | negative regulation of imaginal disc growth ; GO:0045571 | establishment or maintenance of epithelial cell apical/basal polarity ; GO:0045197 | synaptic growth at neuromuscular junction ; GO:0051124 | gravitaxis ; GO:0042332 | nervous sys…	guanylate kinase activity ; GO:0004385 | epidermal growth factor receptor binding ; GO:0005154 | protein binding ; GO:0005515
				FBgn0000163	bazooka	baz	asymmetric protein localization involved in cell fate determination ; GO:0045167 | border follicle cell delamination ; GO:0030709 | apical protein localization ; GO:0045176 | establishment or maintenance of epithelial cell apical/basal polarity ; GO:0045197 | establishment of apical/basal cell polarity ; GO:0035089 | branching involved in open tracheal system development ; GO:0060446 | establishm…	phosphatidic acid binding ; GO:0070300 | protein binding ; GO:0005515 | phosphatidylinositol binding ; GO:0035091
				FBgn0002121	lethal (2) giant larvae	l(2)gl	establishment of epithelial cell planar polarity ; GO:0090163 | asymmetric protein localization involved in cell fate determination ; GO:0045167 | basal protein localization ; GO:0045175 | apical protein localization ; GO:0045176 | establishment of protein localization ; GO:0045184 | septate junction assembly ; GO:0019991 | establishment or maintenance of polarity of follicular epithelium ; GO:00…	SNARE binding ; GO:0000149 | protein kinase inhibitor activity ; GO:0004860 | myosin II binding ; GO:0045159 | Rab GTPase binding ; GO:0017137 | myosin binding ; GO:0017022 | GTPase activator activity ; GO:0005096 | syntaxin binding ; GO:0019905
				FBgn0001075	fat	ft	homophilic cell adhesion via plasma membrane adhesion molecules ; GO:0007156 | imaginal disc growth ; GO:0007446 | positive regulation of apoptotic process ; GO:0043065 | imaginal disc pattern formation ; GO:0007447 | establishment of ommatidial planar polarity ; GO:0042067 | negative regulation of cell population proliferation ; GO:0008285 | establishment of imaginal disc-derived wing hair orien…	myosin binding ; GO:0017022 | protein binding ; GO:0005515 | calcium ion binding ; GO:0005509 | protein binding ; GO:0005515 | cadherin binding ; GO:0045296
				FBgn0262029	dachs	d	establishment of ommatidial planar polarity ; GO:0042067 | negative regulation of hippo signaling ; GO:0035331 | protein localization involved in establishment of planar polarity ; GO:0090251 | wing disc development ; GO:0035220 | establishment of planar polarity ; GO:0001736 | positive regulation of growth ; GO:0045927 | leg disc development ; GO:0035218 | imaginal disc-derived wing vein morphog…	motor activity ; GO:0003774 | ATPase activity ; GO:0016887 | actin filament binding ; GO:0051015 | microfilament motor activity ; GO:0000146 | protein binding ; GO:0005515 | molecular adaptor activity ; GO:0060090 | ATP binding ; GO:0005524
				FBgn0034264	Dachs ligand with SH3s	Dlish	protein localization involved in establishment of planar polarity ; GO:0090251 | establishment of planar polarity ; GO:0001736 | negative regulation of hippo signaling ; GO:0035331 | establishment of epithelial cell planar polarity ; GO:0090163	cadherin binding ; GO:0045296 | protein binding ; GO:0005515
				FBgn0034590	Magi	Magi	adherens junction organization ; GO:0034332 | signal transduction ; GO:0007165	Ral GTPase binding ; GO:0017160
				FBgn0004167	karst	kst	endosome transport via multivesicular body sorting pathway ; GO:0032509 | endocytosis ; GO:0006897 | ovarian follicle cell development ; GO:0030707 | wound healing ; GO:0042060 | plasma membrane organization ; GO:0007009 | regulation of multivesicular body size involved in endosome transport ; GO:0010797 | zonula adherens assembly ; GO:0045186	phospholipid binding ; GO:0005543 | protein binding ; GO:0005515 | actin binding ; GO:0003779 | microtubule binding ; GO:0008017
				FBgn0035976	Peptidoglycan recognition protein LC	PGRP-LC	peptidoglycan recognition protein signaling pathway ; GO:0061057 | immune response ; GO:0006955 | response to bacterium ; GO:0009617 | defense response to Gram-negative bacterium ; GO:0050829 | positive regulation of biosynthetic process of antibacterial peptides active against Gram-negative bacteria ; GO:0006964 | regulation of humoral immune response ; GO:0002920 | peptidoglycan catabolic proce…	zinc ion binding ; GO:0008270 | peptidoglycan binding ; GO:0042834 | N-acetylmuramoyl-L-alanine amidase activity ; GO:0008745 | peptidoglycan receptor activity ; GO:0016019 | protein binding ; GO:0005515
				FBgn0259685	crumbs	crb	apical constriction ; GO:0003383 | protein stabilization ; GO:0050821 | centrosome localization ; GO:0051642 | establishment or maintenance of polarity of embryonic epithelium ; GO:0016332 | establishment or maintenance of cell polarity ; GO:0007163 | cell morphogenesis involved in Malpighian tubule morphogenesis ; GO:0061336 | zonula adherens assembly ; GO:0045186 | rhabdomere development ; GO:0…	calcium ion binding ; GO:0005509 | spectrin binding ; GO:0030507 | protein kinase C binding ; GO:0005080 | Notch binding ; GO:0005112
				FBgn0261873	stardust	sdt	establishment or maintenance of epithelial cell apical/basal polarity ; GO:0045197 | chitin-based cuticle development ; GO:0040003 | apical protein localization ; GO:0045176 | zonula adherens assembly ; GO:0045186 | morphogenesis of an epithelium ; GO:0002009 | morphogenesis of a polarized epithelium ; GO:0001738 | cell-cell junction assembly ; GO:0007043 | establishment or maintenance of polarit…	protein binding ; GO:0005515 | guanylate kinase activity ; GO:0004385
				FBgn0265778	PDZ domain-containing guanine nucleotide exchange factor	PDZ-GEF	small GTPase mediated signal transduction ; GO:0007264 | oogenesis ; GO:0048477 | germ-line stem cell population maintenance ; GO:0030718 | MAPK cascade ; GO:0000165 | positive regulation of sevenless signaling pathway ; GO:0045874 | adherens junction assembly ; GO:0034333 | hemocyte migration ; GO:0035099 | substrate-dependent cell migration, cell extension ; GO:0006930 | compound eye developmen…	Rap guanyl-nucleotide exchange factor activity ; GO:0017034 | Ras GTPase binding ; GO:0017016
				FBgn0261854	atypical protein kinase C	aPKC	branching involved in open tracheal system development ; GO:0060446 | maintenance of cell polarity ; GO:0030011 | spermatogenesis ; GO:0007283 | compound eye retinal cell programmed cell death ; GO:0046667 | adherens junction organization ; GO:0034332 | terminal branching, open tracheal system ; GO:0007430 | establishment or maintenance of neuroblast polarity ; GO:0045196 | synapse assembly ; GO:…	ATP binding ; GO:0005524 | protein serine/threonine kinase activity ; GO:0004674 | inferred from direct assay <newline> myosin binding ; GO:0017022 | protein binding ; GO:0005515
		GO:0034333	adherens junction assembly | adherens junction formation. The aggregation, arrangement and bonding together of a set of components to form an adherens junction. An adherens junction is a cell-cell junction composed of the epithelial cadherin-catenin complex at which the cytoplasmic face of the plasma membrane is attached to actin filaments.	FBgn0027509	tubulin folding cofactor D	TBCD	post-chaperonin tubulin folding pathway ; GO:0007023 | tubulin complex assembly ; GO:0007021 | establishment or maintenance of neuroblast polarity ; GO:0045196 | adherens junction assembly ; GO:0034333 | dendrite morphogenesis ; GO:0048813 | microtubule cytoskeleton organization ; GO:0000226 | axonogenesis ; GO:0007409 | bicellular tight junction assembly ; GO:0070830 | microtubule cytoskeleton o…	beta-tubulin binding ; GO:0048487 | GTPase activator activity ; GO:0005096 | beta-tubulin binding ; GO:0048487
				FBgn0004636	Rap1 GTPase	Rap1	positive regulation of ERK1 and ERK2 cascade ; GO:0070374 | R7 cell fate commitment ; GO:0007465 | Rap protein signal transduction ; GO:0032486 | cellular response to cAMP ; GO:0071320 | positive regulation of sevenless signaling pathway ; GO:0045874 | dorsal closure ; GO:0007391 | adherens junction assembly ; GO:0034333 | germ-line stem cell population maintenance ; GO:0030718 | Rap protein sign…	protein binding ; GO:0005515 | GTPase activity ; GO:0003924 | GDP binding ; GO:0019003 | GTP binding ; GO:0005525
				FBgn0010215	alpha Catenin	alpha-Cat	cell adhesion ; GO:0007155 | adherens junction organization ; GO:0034332 | apical constriction ; GO:0003383 | dorsal closure, amnioserosa morphology change ; GO:0046664 | cytoskeletal anchoring at plasma membrane ; GO:0007016 | adherens junction assembly ; GO:0034333 | establishment or maintenance of cell polarity ; GO:0007163 | head morphogenesis ; GO:0060323	actin filament binding ; GO:0051015 | cadherin binding ; GO:0045296 | structural molecule activity ; GO:0005198 | protein binding ; GO:0005515
				FBgn0265778	PDZ domain-containing guanine nucleotide exchange factor	PDZ-GEF	small GTPase mediated signal transduction ; GO:0007264 | oogenesis ; GO:0048477 | germ-line stem cell population maintenance ; GO:0030718 | MAPK cascade ; GO:0000165 | positive regulation of sevenless signaling pathway ; GO:0045874 | adherens junction assembly ; GO:0034333 | hemocyte migration ; GO:0035099 | substrate-dependent cell migration, cell extension ; GO:0006930 | compound eye developmen…	Rap guanyl-nucleotide exchange factor activity ; GO:0017034 | Ras GTPase binding ; GO:0017016
				FBgn0027598	CIN85 and CD2AP related	cindr	intercellular bridge organization ; GO:0043063 | compound eye morphogenesis ; GO:0001745 | compound eye development ; GO:0048749 | actin filament organization ; GO:0007015 | border follicle cell migration ; GO:0007298 | positive regulation of receptor-mediated endocytosis ; GO:0048260 | adherens junction assembly ; GO:0034333 | regulation of cytokinesis ; GO:0032465	cell adhesion molecule binding ; GO:0050839 | SH3 domain binding ; GO:0017124 | GTPase activating protein binding ; GO:0032794

## Sheet: Sheet1
#SUBMITTED ID	GO_BIOLOGICAL_PROCESS	GO_MOLECULAR_FUNCTION	NAME	SYMBOL
FBgn0029662	cell redox homeostasis ; GO:0045454 | inferred from electronic annotation with InterPro:IPR002109 <newline> biological_process ; GO:0008150 | no biological data available	electron transfer activity ; GO:0009055 | inferred from electronic annotation with InterPro:IPR002109 <newline> protein disulfide oxidoreductase activity ; GO:0015035 | inferred from electronic annotation with InterPro:IPR002109 <newline> molecular_function ; GO:0003674 | no biological data available	-	CG12206
FBgn0011761	glycerol ether metabolic process ; GO:0006662 | inferred from electronic annotation with InterPro:IPR005746 <newline> cell redox homeostasis ; GO:0045454 | inferred from electronic annotation with InterPro:IPR005746, InterPro:IPR013766, InterPro:IPR017937 <newline> fertilization, exchange of chromosomal proteins ; GO:0035042 | inferred from mutant phenotype <newline> head development ; GO:0060322…	protein disulfide oxidoreductase activity ; GO:0015035 | inferred from electronic annotation with InterPro:IPR005746 <newline> disulfide oxidoreductase activity ; GO:0015036 | inferred from sequence or structural similarity with SGD:S000004033 <newline> disulfide oxidoreductase activity ; GO:0015036 | inferred from direct assay	deadhead	dhd
FBgn0030584	cell redox homeostasis ; GO:0045454 | inferred from electronic annotation with InterPro:IPR002109	electron transfer activity ; GO:0009055 | inferred from electronic annotation with InterPro:IPR002109 <newline> protein disulfide oxidoreductase activity ; GO:0015035 | inferred from electronic annotation with InterPro:IPR002109	-	CG14407
FBgn0040070	glycerol ether metabolic process ; GO:0006662 | inferred from electronic annotation with InterPro:IPR005746 <newline> defense response to fungus ; GO:0050832 | inferred from mutant phenotype <newline> response to oxidative stress ; GO:0006979 | inferred from mutant phenotype <newline> cell redox homeostasis ; GO:0045454 | inferred from direct assay <newline> determination of adult lifespan ; GO:0…	protein disulfide oxidoreductase activity ; GO:0015035 | inferred from electronic annotation with InterPro:IPR005746 <newline> disulfide oxidoreductase activity ; GO:0015036 | inferred from direct assay	thioredoxin-2	Trx-2
FBgn0261274	oxidation-reduction process ; GO:0055114 | inferred from electronic annotation with InterPro:IPR007266 <newline> protein folding in endoplasmic reticulum ; GO:0034975 | inferred from mutant phenotype <newline> protein folding in endoplasmic reticulum ; GO:0034975 | inferred from biological aspect of ancestor with PANTHER:PTN000289179 <newline> chaperone cofactor-dependent protein refolding ; GO:0…	oxidoreductase activity, acting on a sulfur group of donors, disulfide as acceptor ; GO:0016671 | inferred from electronic annotation with InterPro:IPR007266 <newline> protein disulfide isomerase activity ; GO:0003756 | inferred from mutant phenotype <newline> protein disulfide isomerase activity ; GO:0003756 | inferred from biological aspect of ancestor with PANTHER:PTN000289179 <newline> protei…	Endoplasmic reticulum oxidoreductin-1-like	Ero1L
FBgn0035631	cell redox homeostasis ; GO:0045454 | inferred from electronic annotation with InterPro:IPR013766, InterPro:IPR017937	disulfide oxidoreductase activity ; GO:0015036 | inferred from sequence or structural similarity with UniProtKB:O43396	Thioredoxin-like	Txl
FBgn0004465	cell redox homeostasis ; GO:0045454 | inferred from electronic annotation with InterPro:IPR002109, InterPro:IPR011767	electron transfer activity ; GO:0009055 | inferred from electronic annotation with InterPro:IPR002109, InterPro:IPR011767 <newline> protein disulfide oxidoreductase activity ; GO:0015035 | inferred from electronic annotation with InterPro:IPR002109 <newline> prostaglandin-E synthase activity ; GO:0050220 | inferred from sequence or structural similarity with UniProtKB:Q9H7Z7	Suppressor of ref(2)P sterility	Su(P)
FBgn0036820	cell redox homeostasis ; GO:0045454 | inferred from electronic annotation with InterPro:IPR002109, InterPro:IPR011899 <newline> response to copper ion ; GO:0046688 | inferred from mutant phenotype <newline> copper ion homeostasis ; GO:0055070 | inferred from genetic interaction with ATP7 inferred from genetic interaction with Ctr1B inferred from genetic interaction with Ctr1A <newline> cellular r…	electron transfer activity ; GO:0009055 | inferred from electronic annotation with InterPro:IPR002109 <newline> protein disulfide oxidoreductase activity ; GO:0015035 | inferred from electronic annotation with InterPro:IPR002109 <newline> glutathione-disulfide reductase activity ; GO:0004362 | inferred from biological aspect of ancestor with PANTHER:PTN000018533	Glutaredoxin 1	Grx1
FBgn0261524	positive regulation of protein phosphorylation ; GO:0001934 | inferred from genetic interaction with gig <newline> activation of MAPK activity ; GO:0000187 | inferred from direct assay <newline> stress-activated protein kinase signaling cascade ; GO:0031098 | inferred from biological aspect of ancestor with PANTHER:PTN000684825 <newline> p38MAPK cascade ; GO:0038066 | inferred from mutant phenoty…	ATP binding ; GO:0005524 | inferred from electronic annotation with InterPro:IPR000719 <newline> MAP kinase kinase activity ; GO:0004708 | inferred from direct assay <newline> mitogen-activated protein kinase kinase kinase binding ; GO:0031435 | inferred from physical interaction with Mekk1 <newline> protein kinase activity ; GO:0004672 | inferred from direct assay <newline> MAP kinase kinase act…	licorne	lic
FBgn0000163	asymmetric protein localization involved in cell fate determination ; GO:0045167 | inferred from mutant phenotype <newline> border follicle cell delamination ; GO:0030709 | inferred from mutant phenotype <newline> apical protein localization ; GO:0045176 | non-traceable author statement <newline> establishment or maintenance of epithelial cell apical/basal polarity ; GO:0045197 | inferred from bi…	phosphatidic acid binding ; GO:0070300 | inferred from direct assay <newline> protein binding ; GO:0005515 | inferred from physical interaction with Traf4 <newline> phosphatidylinositol binding ; GO:0035091 | inferred from direct assay <newline> phosphatidylinositol binding ; GO:0035091 | inferred from biological aspect of ancestor with PANTHER:PTN001046835	bazooka	baz
FBgn0026192	zonula adherens assembly ; GO:0045186 | traceable author statement <newline> positive regulation of lamellipodium assembly ; GO:0010592 | inferred from mutant phenotype <newline> border follicle cell migration ; GO:0007298 | inferred from mutant phenotype <newline> establishment or maintenance of neuroblast polarity ; GO:0045196 | non-traceable author statement <newline> positive regulation of fi…	Rho GTPase binding ; GO:0017048 | inferred from biological aspect of ancestor with PANTHER:PTN001019968 <newline> protein binding ; GO:0005515 | inferred from physical interaction with sdt <newline> protein kinase C binding ; GO:0005080 | inferred from biological aspect of ancestor with PANTHER:PTN001019968	par-6	par-6
FBgn0001137	epidermal growth factor receptor signaling pathway ; GO:0007173 | inferred from mutant phenotype <newline> chorion-containing eggshell pattern formation ; GO:0030381 | inferred from high throughput mutant phenotype <newline> epidermal growth factor receptor signaling pathway ; GO:0007173 | inferred from genetic interaction with Cbl <newline> oocyte dorsal/ventral axis specification ; GO:0007310 |…	epidermal growth factor receptor binding ; GO:0005154 | inferred from direct assay <newline> receptor ligand activity ; GO:0048018 | inferred from biological aspect of ancestor with PANTHER:PTN000960795 <newline> protein binding ; GO:0005515 | inferred from physical interaction with UniProtKB:P49858 <newline> receptor ligand activity ; GO:0048018 | inferred from direct assay	gurken	grk
FBgn0000183	oogenesis ; GO:0048477 | traceable author statement <newline> oogenesis ; GO:0048477 | inferred from mutant phenotype <newline> regulation of endocytosis ; GO:0030100 | inferred from mutant phenotype <newline> synaptic vesicle endocytosis ; GO:0048488 | inferred from genetic interaction with EndoA <newline> germarium-derived oocyte fate determination ; GO:0007294 | traceable author statement <new…	cytoskeletal adaptor activity ; GO:0008093 | inferred from electronic annotation with InterPro:IPR018477 <newline> dynein complex binding ; GO:0070840 | inferred from electronic annotation with InterPro:IPR018477 <newline> Rab GTPase binding ; GO:0017137 | inferred from physical interaction with Rab2 inferred from physical interaction with Rab39 inferred from physical interaction with Rab30 <newl…	Bicaudal D	BicD
FBgn0034072	cytoskeletal anchoring at plasma membrane ; GO:0007016 | inferred from electronic annotation with InterPro:IPR008465 <newline> oocyte axis specification ; GO:0007309 | inferred from mutant phenotype <newline> establishment or maintenance of cell polarity ; GO:0007163 | inferred from mutant phenotype <newline> muscle cell cellular homeostasis ; GO:0046716 | inferred from mutant phenotype <newline>…	calcium ion binding ; GO:0005509 | inferred from electronic annotation with InterPro:IPR015919 <newline> protein binding ; GO:0005515 | inferred from physical interaction with Dys <newline> structural constituent of muscle ; GO:0008307 | inferred from sequence or structural similarity with HGNC:2666 <newline> protein binding ; GO:0005515 | inferred from physical interaction with UniProtKB:Q0KI50 …	Dystroglycan	Dg
FBgn0034451	establishment of apical/basal cell polarity ; GO:0035089 | inferred from mutant phenotype <newline> cytoplasmic microtubule organization ; GO:0031122 | inferred from mutant phenotype <newline> oocyte axis specification ; GO:0007309 | inferred from mutant phenotype	-	tubulin-binding cofactor B	TBCB
FBgn0003731	cell-cell adhesion ; GO:0098609 | inferred from mutant phenotype <newline> notum development ; GO:0007477 | inferred from mutant phenotype <newline> epithelial cell proliferation involved in Malpighian tubule morphogenesis ; GO:0061331 | inferred from mutant phenotype <newline> eye-antennal disc morphogenesis ; GO:0007455 | inferred from mutant phenotype <newline> negative regulation of G1/S tran…	protein domain specific binding ; GO:0019904 | inferred from electronic annotation with InterPro:IPR000308 <newline> ATP binding ; GO:0005524 | inferred from electronic annotation with InterPro:IPR000719, InterPro:IPR006211, InterPro:IPR017441 <newline> epidermal growth factor-activated receptor activity ; GO:0005006 | inferred from direct assay <newline> protein binding ; GO:0005515 | inferred f…	Epidermal growth factor receptor	Egfr
FBgn0003205	cell fate determination ; GO:0001709 | inferred from mutant phenotype <newline> vascular endothelial growth factor receptor signaling pathway ; GO:0048010 | inferred from genetic interaction with Pvr <newline> myoblast fate specification ; GO:0048626 | inferred from genetic interaction with htl <newline> lymph gland plasmatocyte differentiation ; GO:0035169 | inferred from mutant phenotype <newli…	GTPase activity ; GO:0003924 | inferred from direct assay <newline> protein binding ; GO:0005515 | inferred from physical interaction with Rgl <newline> GTPase activity ; GO:0003924 | inferred from biological aspect of ancestor with PANTHER:PTN000631348 <newline> GTP binding ; GO:0005525 | inferred from biological aspect of ancestor with PANTHER:PTN000631348 <newline> GDP binding ; GO:0019003 | i…	Ras oncogene at 85D	Ras85D
FBgn0004882	pole plasm oskar mRNA localization ; GO:0045451 | inferred from mutant phenotype <newline> regulation of oskar mRNA translation ; GO:0046011 | inferred from mutant phenotype <newline> mRNA polyadenylation ; GO:0006378 | inferred from mutant phenotype <newline> dorsal/ventral axis specification, ovarian follicular epithelium ; GO:0008069 | inferred from mutant phenotype inferred from genetic inter…	mRNA binding ; GO:0003729 | traceable author statement <newline> translation factor activity, RNA binding ; GO:0008135 | inferred from biological aspect of ancestor with PANTHER:PTN000286163 <newline> protein binding ; GO:0005515 | inferred from physical interaction with bru1 inferred from physical interaction with BicC <newline> translation repressor activity, mRNA regulatory element binding ; G…	oo18 RNA-binding protein	orb
FBgn0086362	chaeta morphogenesis ; GO:0008407 | inferred from mutant phenotype <newline> oocyte anterior/posterior axis specification ; GO:0007314 | inferred from mutant phenotype <newline> positive regulation of neuron remodeling ; GO:1904801 | inferred from mutant phenotype <newline> cellular protein localization ; GO:0034613 | inferred from mutant phenotype <newline> oocyte axis specification ; GO:0007309…	protein binding ; GO:0005515 | inferred from physical interaction with UniProtKB:Q9V3Y8 <newline> protein binding ; GO:0005515 | inferred from physical interaction with UniProtKB:Q24117 inferred from physical interaction with UniProtKB:Q9V3Y8 <newline> ATP-dependent microtubule motor activity, minus-end-directed ; GO:0008569 | inferred from direct assay	spn-F	spn-F
FBgn0026181	regulation of actin filament bundle assembly ; GO:0032231 | inferred from mutant phenotype inferred from genetic interaction with dsh inferred from genetic interaction with fz <newline> mitotic cytokinesis ; GO:0000281 | inferred from mutant phenotype <newline> mitotic cytokinesis ; GO:0000281 | inferred from direct assay <newline> regulation of phosphorylation ; GO:0042325 | inferred from direct…	ATP binding ; GO:0005524 | inferred from electronic annotation with InterPro:IPR000719, InterPro:IPR000961, InterPro:IPR002290, InterPro:IPR017441 <newline> GTPase binding ; GO:0051020 | inferred from physical interaction with Rho1 <newline> protein binding ; GO:0005515 | inferred from physical interaction with UniProtKB:A1Z9P3 <newline> Rho-dependent protein serine/threonine kinase activity ; GO…	Rho kinase	Rok
FBgn0261854	branching involved in open tracheal system development ; GO:0060446 | inferred from mutant phenotype <newline> maintenance of cell polarity ; GO:0030011 | inferred from mutant phenotype <newline> spermatogenesis ; GO:0007283 | inferred from mutant phenotype <newline> compound eye retinal cell programmed cell death ; GO:0046667 | inferred from direct assay <newline> adherens junction organization …	ATP binding ; GO:0005524 | inferred from electronic annotation with InterPro:IPR000719, InterPro:IPR000961, InterPro:IPR002290, InterPro:IPR012233, InterPro:IPR017441, InterPro:IPR017892 <newline> protein serine/threonine kinase activity ; GO:0004674 | inferred from direct assay <newline> myosin binding ; GO:0017022 | inferred from physical interaction with Myo10A <newline> protein serine/threoni…	atypical protein kinase C	aPKC
FBgn0030696	mitotic spindle organization ; GO:0007052 | inferred from biological aspect of ancestor with PANTHER:PTN000000630	protein tyrosine phosphatase activator activity ; GO:0008160 | inferred from biological aspect of ancestor with PANTHER:PTN000000630 <newline> peptidyl-prolyl cis-trans isomerase activity ; GO:0003755 | inferred from biological aspect of ancestor with PANTHER:PTN000000630	-	CG8509
FBgn0004432	protein peptidyl-prolyl isomerization ; GO:0000413 | inferred from electronic annotation with InterPro:IPR002130 <newline> protein refolding ; GO:0042026 | inferred from biological aspect of ancestor with PANTHER:PTN002594282	peptidyl-prolyl cis-trans isomerase activity ; GO:0003755 | inferred from biological aspect of ancestor with PANTHER:PTN002594282 <newline> peptidyl-prolyl cis-trans isomerase activity ; GO:0003755 | inferred from sequence or structural similarity <newline> unfolded protein binding ; GO:0051082 | inferred from biological aspect of ancestor with PANTHER:PTN002594282 <newline> cyclosporin A binding…	Cyclophilin 1	Cyp1
FBgn0015379	regulation of locomotor rhythm ; GO:1904059 | inferred from mutant phenotype <newline> positive regulation of protein ubiquitination ; GO:0031398 | inferred from direct assay	peptidyl-prolyl cis-trans isomerase activity ; GO:0003755 | inferred from sequence or structural similarity with HGNC:8988 inferred from sequence or structural similarity with SGD:S000003778 <newline> peptidyl-prolyl cis-trans isomerase activity ; GO:0003755 | inferred from biological aspect of ancestor with PANTHER:PTN000069608 <newline> transcription factor binding ; GO:0008134 | inferred from …	dodo	dod
FBgn0002936	protein peptidyl-prolyl isomerization ; GO:0000413 | inferred from electronic annotation with InterPro:IPR002130 <newline> phototransduction ; GO:0007602 | inferred from physical interaction with ninaE <newline> rhodopsin biosynthetic process ; GO:0016063 | inferred from mutant phenotype <newline> intrinsic apoptotic signaling pathway in response to endoplasmic reticulum stress ; GO:0070059 | inf…	peptidyl-prolyl cis-trans isomerase activity ; GO:0003755 | traceable author statement <newline> peptidyl-prolyl cis-trans isomerase activity ; GO:0003755 | inferred from biological aspect of ancestor with PANTHER:PTN002594282 <newline> cyclosporin A binding ; GO:0016018 | inferred from biological aspect of ancestor with PANTHER:PTN002594282 <newline> cyclosporin A binding ; GO:0016018 | inferred…	neither inactivation nor afterpotential A	ninaA
FBgn0016698	regulation of asymmetric protein localization involved in cell fate determination ; GO:1904785 | inferred from mutant phenotype <newline> basal protein localization ; GO:0045175 | inferred from mutant phenotype <newline> mitotic spindle organization ; GO:0007052 | inferred from biological aspect of ancestor with PANTHER:PTN000000630	protein tyrosine phosphatase activator activity ; GO:0008160 | inferred from biological aspect of ancestor with PANTHER:PTN000000630 <newline> peptidyl-prolyl cis-trans isomerase activity ; GO:0003755 | inferred from biological aspect of ancestor with PANTHER:PTN000000630	Phosphotyrosyl phosphatase activator	Ptpa
FBgn0033089	protein peptidyl-prolyl isomerization ; GO:0000413 | inferred from electronic annotation with InterPro:IPR002130 <newline> positive regulation of viral genome replication ; GO:0045070 | inferred from biological aspect of ancestor with PANTHER:PTN000870406 <newline> mRNA splicing, via spliceosome ; GO:0000398 | inferred by curator from GO:0071011 <newline> protein refolding ; GO:0042026 | inferred…	cyclosporin A binding ; GO:0016018 | inferred from biological aspect of ancestor with PANTHER:PTN002594282 <newline> unfolded protein binding ; GO:0051082 | inferred from biological aspect of ancestor with PANTHER:PTN002594282 <newline> ribonucleoprotein complex binding ; GO:0043021 | inferred from biological aspect of ancestor with PANTHER:PTN000870406 <newline> peptidyl-prolyl cis-trans isomera…	-	CG17266
FBgn0033527	protein peptidyl-prolyl isomerization ; GO:0000413 | inferred from biological aspect of ancestor with PANTHER:PTN000116297 <newline> protein polyubiquitination ; GO:0000209 | inferred from sequence or structural similarity with HGNC:9261	peptidyl-prolyl cis-trans isomerase activity ; GO:0003755 | inferred from biological aspect of ancestor with PANTHER:PTN000116297	-	CG11777
FBgn0034109	protein folding ; GO:0006457 | inferred from electronic annotation with InterPro:IPR002130, InterPro:IPR020892, InterPro:IPR024936 <newline> protein peptidyl-prolyl isomerization ; GO:0000413 | inferred from biological aspect of ancestor with PANTHER:PTN000116297 <newline> mRNA splicing, via spliceosome ; GO:0000398 | inferred by curator from GO:0071013 <newline> protein polyubiquitination ; GO:0…	ubiquitin-ubiquitin ligase activity ; GO:0034450 | inferred from biological aspect of ancestor with PANTHER:PTN000116300 <newline> peptidyl-prolyl cis-trans isomerase activity ; GO:0003755 | inferred from biological aspect of ancestor with PANTHER:PTN000116297 <newline> ubiquitin-protein transferase activity ; GO:0004842 | inferred from sequence or structural similarity with HGNC:9261	-	CG7747
FBgn0028382	protein peptidyl-prolyl isomerization ; GO:0000413 | inferred from electronic annotation with InterPro:IPR002130 <newline> protein refolding ; GO:0042026 | inferred from biological aspect of ancestor with PANTHER:PTN002594282 <newline> mRNA splicing, via spliceosome ; GO:0000398 | inferred by curator from GO:0071011,GO:0071013	RNA binding ; GO:0003723 | inferred from electronic annotation with InterPro:IPR016304 <newline> unfolded protein binding ; GO:0051082 | inferred from biological aspect of ancestor with PANTHER:PTN002594282 <newline> mRNA binding ; GO:0003729 | inferred from sequence or structural similarity <newline> cyclosporin A binding ; GO:0016018 | inferred from biological aspect of ancestor with PANTHER:PT…	cyclophilin-33	cyp33
FBgn0034368	-	-	zonda	zda
FBgn0013954	protein peptidyl-prolyl isomerization ; GO:0000413 | inferred from biological aspect of ancestor with PANTHER:PTN000054102 <newline> chaperone-mediated protein folding ; GO:0061077 | inferred from biological aspect of ancestor with PANTHER:PTN000054102	peptidyl-prolyl cis-trans isomerase activity ; GO:0003755 | inferred from biological aspect of ancestor with PANTHER:PTN000054102	FK506-binding protein 12kD	Fkbp12
FBgn0010470	imaginal disc-derived wing margin morphogenesis ; GO:0008587 | inferred from mutant phenotype <newline> chaeta development ; GO:0022416 | inferred from mutant phenotype <newline> positive regulation of Notch signaling pathway ; GO:0045747 | inferred from genetic interaction with Dl inferred from genetic interaction with Psn <newline> imaginal disc development ; GO:0007444 | inferred from mutant p…	calcium ion binding ; GO:0005509 | inferred from electronic annotation with InterPro:IPR002048	FK506-binding protein 14	Fkbp14
FBgn0034753	protein peptidyl-prolyl isomerization ; GO:0000413 | inferred from electronic annotation with InterPro:IPR002130 <newline> multicellular organism reproduction ; GO:0032504 | inferred from high throughput expression pattern <newline> protein refolding ; GO:0042026 | inferred from biological aspect of ancestor with PANTHER:PTN002594282	peptidyl-prolyl cis-trans isomerase activity ; GO:0003755 | inferred from biological aspect of ancestor with PANTHER:PTN002594282 <newline> unfolded protein binding ; GO:0051082 | inferred from biological aspect of ancestor with PANTHER:PTN002594282 <newline> cyclosporin A binding ; GO:0016018 | inferred from biological aspect of ancestor with PANTHER:PTN002594282	-	CG2852
FBgn0035027	protein peptidyl-prolyl isomerization ; GO:0000413 | inferred from biological aspect of ancestor with PANTHER:PTN000116297	peptidyl-prolyl cis-trans isomerase activity ; GO:0003755 | inferred from biological aspect of ancestor with PANTHER:PTN000116297	-	CG3511
FBgn0035141	protein folding ; GO:0006457 | inferred from electronic annotation with InterPro:IPR002130, InterPro:IPR020892, InterPro:IPR024936 <newline> mRNA splicing, via spliceosome ; GO:0000398 | inferred by curator from GO:0071011,GO:0071013 <newline> protein peptidyl-prolyl isomerization ; GO:0000413 | inferred from biological aspect of ancestor with PANTHER:PTN000116297	peptidyl-prolyl cis-trans isomerase activity ; GO:0003755 | inferred from biological aspect of ancestor with PANTHER:PTN000116297	Cyclophilin-like	Cypl
FBgn0036020	protein peptidyl-prolyl isomerization ; GO:0000413 | inferred from electronic annotation with InterPro:IPR002130 <newline> protein refolding ; GO:0042026 | inferred from biological aspect of ancestor with PANTHER:PTN002594282 <newline> regulation of apoptotic process ; GO:0042981 | inferred from biological aspect of ancestor with PANTHER:PTN000869969	peptidyl-prolyl cis-trans isomerase activity ; GO:0003755 | inferred from biological aspect of ancestor with PANTHER:PTN002594282 <newline> cyclosporin A binding ; GO:0016018 | inferred from biological aspect of ancestor with PANTHER:PTN002594282 <newline> unfolded protein binding ; GO:0051082 | inferred from biological aspect of ancestor with PANTHER:PTN002594282	-	CG8336
FBgn0036207	protein folding ; GO:0006457 | inferred from electronic annotation with InterPro:IPR002130, InterPro:IPR020892, InterPro:IPR024936 <newline> protein peptidyl-prolyl isomerization ; GO:0000413 | inferred from biological aspect of ancestor with PANTHER:PTN000116297 <newline> mRNA splicing, via spliceosome ; GO:0000398 | inferred by curator from GO:0071011,GO:0071013	peptidyl-prolyl cis-trans isomerase activity ; GO:0003755 | inferred from biological aspect of ancestor with PANTHER:PTN000116297	-	CG10907
FBgn0036415	protein peptidyl-prolyl isomerization ; GO:0000413 | inferred from electronic annotation with InterPro:IPR002130 <newline> protein refolding ; GO:0042026 | inferred from biological aspect of ancestor with PANTHER:PTN002594282	cyclosporin A binding ; GO:0016018 | inferred from biological aspect of ancestor with PANTHER:PTN002594282 <newline> peptidyl-prolyl cis-trans isomerase activity ; GO:0003755 | inferred from biological aspect of ancestor with PANTHER:PTN002594282 <newline> unfolded protein binding ; GO:0051082 | inferred from biological aspect of ancestor with PANTHER:PTN002594282	-	CG7768
FBgn0037930	-	-	-	CG14715
FBgn0013269	negative regulation of macroautophagy ; GO:0016242 | inferred from mutant phenotype <newline> negative regulation of autophagy ; GO:0010507 | inferred from mutant phenotype <newline> juvenile hormone mediated signaling pathway ; GO:0035626 | inferred from mutant phenotype	juvenile hormone response element binding ; GO:0070594 | inferred from direct assay <newline> FK506 binding ; GO:0005528 | inferred from direct assay <newline> protein binding ; GO:0005515 | inferred from physical interaction with Chd64	FK506-binding protein 39kD	Fkbp39
FBgn0038857	regulation of post-translational protein modification ; GO:1901873 | inferred from mutant phenotype <newline> chaperone-mediated protein folding ; GO:0061077 | inferred from biological aspect of ancestor with PANTHER:PTN000054102 <newline> protein peptidyl-prolyl isomerization ; GO:0000413 | inferred from biological aspect of ancestor with PANTHER:PTN000054102 <newline> locomotor rhythm ; GO:0045…	protein binding ; GO:0005515 | inferred from physical interaction with dco <newline> peptidyl-prolyl cis-trans isomerase activity ; GO:0003755 | NOT inferred from key residues <newline> peptidyl-prolyl cis-trans isomerase activity ; GO:0003755 | inferred from biological aspect of ancestor with PANTHER:PTN000054102	Bride of doubletime	Bdbt
FBgn0027617	protein peptidyl-prolyl isomerization ; GO:0000413 | inferred from electronic annotation with InterPro:IPR002130 <newline> mRNA splicing, via spliceosome ; GO:0000398 | inferred by curator from GO:0071011,GO:0071013 <newline> regulation of phosphorylation of RNA polymerase II C-terminal domain ; GO:1901407 | inferred from biological aspect of ancestor with PANTHER:PTN000116816	nucleic acid binding ; GO:0003676 | inferred from electronic annotation with InterPro:IPR000504 <newline> peptidyl-prolyl cis-trans isomerase activity ; GO:0003755 | inferred from electronic annotation with InterPro:IPR002130, InterPro:IPR024936 <newline> mRNA binding ; GO:0003729 | inferred from sequence or structural similarity	-	CG5808
FBgn0039347	protein peptidyl-prolyl isomerization ; GO:0000413 | inferred from electronic annotation with InterPro:IPR002130 <newline> protein refolding ; GO:0042026 | inferred from biological aspect of ancestor with PANTHER:PTN002594282	zinc ion binding ; GO:0008270 | inferred from electronic annotation with InterPro:IPR000315, InterPro:IPR001841 <newline> zinc ion binding ; GO:0008270 | inferred from sequence model <newline> cyclosporin A binding ; GO:0016018 | inferred from biological aspect of ancestor with PANTHER:PTN002594282 <newline> unfolded protein binding ; GO:0051082 | inferred from biological aspect of ancestor with …	-	CG5071
FBgn0039581	protein peptidyl-prolyl isomerization ; GO:0000413 | inferred from electronic annotation with InterPro:IPR002130 <newline> protein refolding ; GO:0042026 | inferred from biological aspect of ancestor with PANTHER:PTN002594282 <newline> mRNA splicing, via spliceosome ; GO:0000398 | inferred by curator from GO:0071011,GO:0071013	peptidyl-prolyl cis-trans isomerase activity ; GO:0003755 | inferred from biological aspect of ancestor with PANTHER:PTN002594282 <newline> peptidyl-prolyl cis-trans isomerase activity ; GO:0003755 | inferred from direct assay <newline> cyclosporin A binding ; GO:0016018 | inferred from biological aspect of ancestor with PANTHER:PTN002594282 <newline> unfolded protein binding ; GO:0051082 | infer…	Moca-cyp	Moca-cyp
FBgn0003401	oogenesis ; GO:0048477 | inferred from high throughput mutant phenotype <newline> piRNA metabolic process ; GO:0034587 | inferred from mutant phenotype <newline> oogenesis ; GO:0048477 | inferred from mutant phenotype	-	shutdown	shu
FBgn0029174	chaperone-mediated protein folding ; GO:0061077 | inferred from biological aspect of ancestor with PANTHER:PTN000054102 <newline> detection of light stimulus involved in visual perception ; GO:0050908 | inferred from physical interaction with inaD inferred from physical interaction with trpl <newline> protein peptidyl-prolyl isomerization ; GO:0000413 | inferred from biological aspect of ancestor…	heat shock protein binding ; GO:0031072 | inferred from electronic annotation with InterPro:IPR031212 <newline> FK506 binding ; GO:0005528 | inferred from sequence or structural similarity with HGNC:3720 <newline> protein binding ; GO:0005515 | inferred from physical interaction with inaD inferred from physical interaction with trpl <newline> peptidyl-prolyl cis-trans isomerase activity ; GO:0003…	FK506-binding protein 59kD	Fkbp59
